# Supplementary material for: Direct C–H borylation of vinylporphyrins via copper catalysis
Source: Royal Society of Chemistry journal article supplement (doi:10.1039/d1ob02005f), 2022-01-01
Supplement: d1ob02005f1.pdf [file d1ob02005f1.pdf]

## Electronic Supplementary Information

### Direct C-H borylation of vinylporphyrins *via* copper catalysis

Evgeny S. Belyaev,<sup>a</sup> Grigory L. Kozhemyakin,<sup>a</sup> Vladimir S. Tyurin,<sup>\*a</sup> Victoria V. Frolova,<sup>a</sup> Ivan S. Lonin,<sup>a</sup> Gellii V. Ponomarev,<sup>b</sup> Aleksey K. Buryak<sup>a</sup> and Ilya A. Zamilatskov<sup>\*a</sup>

<sup>a</sup> *Frumkin Institute of Physical chemistry and Electrochemistry Russian academy of sciences, Leninsky prospect, 31-4, Moscow, 119071, Russian Federation. E-mail: vst-1970@mail.ru (V.S. Tyurin), joz@mail.ru (I.A. Zamilatskov).*

<sup>b</sup> *Research Institute of Biomedical Chemistry, Pogodinskaya street, 10-8, 119121, Moscow, Russian Federation*

### Contents

|                                                   |    |
|---------------------------------------------------|----|
| 1. Synthesis and characteristics of the compounds | 1  |
| 2. NMR spectra                                    | 6  |
| 3. UV-Vis absorption spectra                      | 40 |
| 4. References                                     | 42 |

### Synthesis and characteristics of the compounds

**General.** Reactions were carried out under argon atmosphere using commercially available reagents that were purchased and used as received. Starting methyl pyropheophorbide-*a* (**1a**), dimethyl protoporphyrin IX, and 2,3,7,8,12,13,17,18-octaethylporphyrin were obtained from commercial sources. Heating reaction vessels was performed with oil bath. Column chromatography was performed using 40-63  $\mu\text{m}$  silica gel, preparative thin layer chromatography (TLC) was performed using glass plates coated with 5-40  $\mu\text{m}$  silica gel (5 mm thick). Control of the reactions was provided by TLC using aluminum-backed Silica Gel 60 F254 pre-coated plates. <sup>1</sup>H and <sup>13</sup>C NMR spectra were recorded with a Bruker Avance III 600 MHz spectrometer at room temperature in CDCl<sub>3</sub>. Chemical shifts are reported relative to signals of residual protons of solvents (CDCl<sub>3</sub> – 7.26 ppm). Mass spectra were recorded with UltrafleXtreme mass spectrometer (Bruker Daltonics) in a positive-ion mode using reflection mode with 20 MV voltage without matrix. Electronic absorption spectra were recorded with U-2900 (Hitachi) spectrophotometer in quartz rectangular cells of 10 mm path length at concentration 10<sup>-5</sup> M in CH<sub>2</sub>Cl<sub>2</sub>.

**Synthesis.** Zn(II) methyl pyropheophorbide-*a* (**1b**),<sup>1</sup> Ni(II) methyl pyropheophorbide-*a* (**1c**),<sup>2, 3</sup> and methyl (*E*)-3<sup>2</sup>-bromopyropheophorbide-*a* (**2a**),<sup>4</sup> Zn(II) dimethyl protoporphyrin IX (**6b**) and Ni(II) dimethyl protoporphyrin IX (**6c**)<sup>5</sup> were synthesized according to reported procedures. *meso*-Vinylporphyrinoids **8** and **10** were obtained as follows. The 2,3,7,8,12,13,17,18-octaethylporphyrin was converted to the corresponding iron(III) chloride complex and reduced to the 2,3,7,8,12,13,17,18-octaethyl-17,18-*trans*-dihydroporphyrin with sodium in amyl alcohol as reported.<sup>6</sup> Nickel(II) complexes of 2,3,7,8,12,13,17,18-octaethylporphyrin and 2,3,7,8,12,13,17,18-octaethyl-17,18-*trans*-dihydroporphyrin were obtained and formylated via the Vilsmeier-Haack reaction,<sup>7, 8</sup> followed by the Wittig reaction with triphenylmethylphosphonium iodide to give the 5-vinyl-2,3,7,8,12,13,17,18-octaethylporphyrin (**8**) and 5-vinyl-2,3,7,8,12,13,17,18-octaethyl-17,18-*trans*-dihydroporphyrin (**10**) correspondingly.<sup>9</sup>

#### Zn(II) methyl (*E*)-3<sup>2</sup>-bromopyropheophorbide-*a* (**2b**)

A solution of Zn(OAc)<sub>2</sub>•2H<sub>2</sub>O (2 g, 9 mmol) in CH<sub>3</sub>OH (25 ml) was added to a solution of methyl (*E*)-3<sup>2</sup>-bromopyropheophorbide-*a* (**2a**) (300 mg, 0.48 mmol) in CH<sub>2</sub>Cl<sub>2</sub> (200 ml). The reaction was heated at reflux for 1 h, and then the crude mixture was washed with water (3 x 100 ml). The organic layer was dried over Na<sub>2</sub>SO<sub>4</sub>, filtered and evaporated in vacuum to give the crude product which was purified by flash column chromatography with silica gel using CH<sub>2</sub>Cl<sub>2</sub> as the eluent to give the product **2b** (310 mg, 94%) as a green solid.

<sup>1</sup>H NMR (600 MHz, CD<sub>2</sub>Cl<sub>2</sub>),  $\delta$ , ppm: 9.18 (1H, s, 10-H), 8.83 (1H, s, 5-H), 8.48 (1H, s, 20-H), 8.30 (1H, d, *J* = 14.5 Hz, 3<sup>1</sup>-H), 7.21 (1H, d, *J* = 14.5 Hz, 3<sup>2</sup>-H), 4.80 (1H, d, *J* = 19.0 Hz, 13<sup>2</sup>-H<sup>a</sup>), 4.69 (1H, d, *J* = 19.0 Hz, 13<sup>2</sup>-H<sup>b</sup>), 4.46 (1H, q, *J* = 7.5 Hz, 18-H), 4.22 (1H, m, 17-H), 3.46 (5H, m, 12-CH<sub>3</sub>, 8<sup>1</sup>-CH<sub>2</sub>), 3.42 (3H, s, 17<sup>2</sup>-CO<sub>2</sub>CH<sub>3</sub>), 3.30 (3H, s, 2-CH<sub>3</sub>), 3.01 (3H, s, 7-CH<sub>3</sub>), 2.57 (1H, m, 17<sup>1</sup>-H<sup>a</sup>), 2.51 (1H, m, 17<sup>2</sup>-H<sup>a</sup>), 2.25 (2H, m, 17<sup>1</sup>-H<sup>b</sup>, 17<sup>2</sup>-H<sup>b</sup>), 1.87 (3H, d, *J* = 7.5 Hz, 18-CH<sub>3</sub>), 1.57 (3H, t, *J* = 7.8 Hz, 8<sup>2</sup>-CH<sub>3</sub>). <sup>13</sup>C NMR (150 MHz, CD<sub>2</sub>Cl<sub>2</sub>),  $\delta$ , ppm: 196.1, 173.3, 168.4, 160.9, 156.7, 150.2, 147.1, 145.8, 143.6, 136.2, 134.7, 134.4, 133.4, 131.6, 130.4, 129.6, 110.4, 106.0, 98.3, 92.7, 62.8, 51.4, 50.6, 48.6, 47.8, 30.5, 29.7, 29.5, 23.2, 19.1, 17.0, 12.3, 12.1, 10.4. HRMS (MALDI-TOF), *m/z* found: 688.1037; calc. C<sub>34</sub>H<sub>33</sub>BrN<sub>4</sub>O<sub>3</sub>Zn (M<sup>+</sup>): 688.1028. UV-Vis (CH<sub>2</sub>Cl<sub>2</sub>),  $\lambda_{\text{max}}$ , nm (A<sub>rel.</sub>): 424 (1.00), 517 (0.05), 559 (0.06), 610 (0.12), 659 (0.69).

## The borylation of methyl (*E*)-3<sup>2</sup>-bromopyrophephorbide-*a* (2)

### Methyl (*E*)-3<sup>2</sup>-(4,4,5,5-tetramethyl-1,3,2-dioxaborolane-2-yl)pyrophephorbide-*a* (3a)

A mixture of methyl (*E*)-3<sup>2</sup>-bromopyrophephorbide-*a* (**2a**) (20 mg, 0.032 mmol), bis(pinacolato)diboron (80 mg, 0.315 mmol), Pd(PPh<sub>3</sub>)<sub>4</sub> (7.3 mg, 0.006 mmol) and Cs<sub>2</sub>CO<sub>3</sub> (47 mg, 0.144 mmol) in 1,4-dioxane (2 mL) was stirred at 60 °C for 24 h. Then the solvent was evaporated in vacuum, and the residue was purified by preparative TLC in a CH<sub>2</sub>Cl<sub>2</sub>/EtOH system (100:1) to give the product **3a** (8.6 mg, 40%) as a brown solid.

<sup>1</sup>H NMR (600 MHz, CDCl<sub>3</sub>), δ, ppm: 9.46 (1H, s, 10-H), 9.43 (1H, s, 5-H), 8.69 (1H, d, *J* = 18.7 Hz, 3<sup>1</sup>-H), 8.53 (1H, s, 20-H), 6.72 (1H, d, *J* = 18.7 Hz, 3<sup>2</sup>-H), 5.20 (1H, d, *J* = 19.3 Hz, 13<sup>2</sup>-H<sup>a</sup>), 5.05 (1H, d, *J* = 19.3 Hz, 13<sup>2</sup>-H<sup>b</sup>), 4.42 (1H, q, *J* = 7.5 Hz, 18-H), 4.23 (1H, m, 17-H), 3.65 (2H, q, *J* = 7.8 Hz, 8<sup>1</sup>-CH<sub>2</sub>), 3.61 (3H, s, 12-CH<sub>3</sub>), 3.53 (3H, s, 17<sup>2</sup>-CO<sub>2</sub>CH<sub>3</sub>), 3.41 (3H, s, 2-CH<sub>3</sub>), 3.21 (3H, s, 7-CH<sub>3</sub>), 2.63 (1H, m, 17<sup>1</sup>-H<sup>a</sup>), 2.49 (1H, m, 17<sup>2</sup>-H<sup>a</sup>), 2.22 (2H, m, 17<sup>1</sup>-H<sup>b</sup>, 17<sup>2</sup>-H<sup>b</sup>), 1.74 (3H, d, *J* = 7.5 Hz, 18-CH<sub>3</sub>), 1.64 (3H, t, *J* = 7.8 Hz, 8<sup>2</sup>-CH<sub>3</sub>), 1.43 (12H, s, CH<sub>3</sub>(pin)), 0.10 (1H, s, NH), -1.71 (1H, s, NH). <sup>13</sup>C NMR (150 MHz, CDCl<sub>3</sub>), δ, ppm: 196.1, 173.5, 171.1, 160.5, 155.2, 151.0, 148.9, 145.0, 141.4, 141.2, 138.0, 136.4, 135.6, 132.8, 130.6, 129.2, 128.5, 106.1, 103.9, 97.4, 93.3, 83.8, 82.7, 51.7, 51.6, 50.0, 48.0, 30.9, 29.9, 29.7, 24.9, 24.8, 23.2, 19.5, 17.4, 12.5, 11.4. HRMS (MALDI-TOF), *m/z* found: 675.3702; calc. C<sub>40</sub>H<sub>48</sub>BN<sub>4</sub>O<sub>5</sub> (MH<sup>+</sup>): 675.3718. UV-Vis (CH<sub>2</sub>Cl<sub>2</sub>), λ<sub>max</sub>, nm (A<sub>rel.</sub>): 415 (1.00), 515 (0.11), 544 (0.06), 617 (0.08), 673 (0.51).

### Zn(II) methyl (*E*)-3<sup>2</sup>-(4,4,5,5-tetramethyl-1,3,2-dioxaborolane-2-yl)pyrophephorbide-*a* (3b)

A mixture of PdCl<sub>2</sub>(CH<sub>3</sub>CN)<sub>2</sub> (1.9 mg, 0.007 mmol), dppp (3.6 mg, 0.009 mmol), Cs<sub>2</sub>CO<sub>3</sub> (140 mg, 0.43 mmol) and bis(pinacolato)diboron (368 mg, 1.45 mmol) in 1,4-dioxane (15 mL) was stirred at room temperature for one hour, then it was heated to 80 °C and solution of Zn(II) methyl (*E*)-3<sup>2</sup>-bromopyrophephorbide-*a* (**2b**) (100 mg, 0.14 mmol) in 1,4-dioxane (5 mL) was added dropwise over a period of 15 min and stirred at 80 °C for 3 h. The solvent was evaporated *in vacuo*, the residue was dissolved in CH<sub>2</sub>Cl<sub>2</sub> (20 mL) and washed with water (2x10 mL), then the solvent was evaporated *in vacuo* to give the crude product, which was purified by preparative TLC in a CH<sub>2</sub>Cl<sub>2</sub>/EtOH system (100:1) to give the product **3b** (75 mg, 70%) as a green solid.

<sup>1</sup>H NMR (600 MHz, CDCl<sub>3</sub>), δ, ppm: 9.10 (1H, s, 10-H), 9.08 (1H, s, 5-H), 8.69 (1H, d, *J* = 18.7 Hz, 3<sup>1</sup>-H), 8.45 (1H, s, 20-H), 6.68 (1H, d, *J* = 18.7 Hz, 3<sup>2</sup>-H), 4.49 (1H, d, *J* = 19.3 Hz, 13<sup>2</sup>-H<sup>a</sup>), 4.70 (1H, d, *J* = 19.3 Hz, 13<sup>2</sup>-H<sup>b</sup>), 4.41 (1H, m, 18-H), 4.17 (1H, m, 17-H), 3.46 (2H, q, *J* = 7.8 Hz, 8<sup>1</sup>-CH<sub>2</sub>), 3.42 (3H, s, 12-CH<sub>3</sub>), 3.43 (3H, s, 17<sup>2</sup>-CO<sub>2</sub>CH<sub>3</sub>), 3.42 (3H, s, 2-CH<sub>3</sub>), 3.05 (3H, s, 7-CH<sub>3</sub>), 2.51 (1H, m, 17<sup>1</sup>-H<sup>a</sup>), 2.44 (1H, m, 17<sup>2</sup>-H<sup>a</sup>), 2.19 (2H, m, 17<sup>1</sup>-H<sup>b</sup>, 17<sup>2</sup>-H<sup>b</sup>), 1.88 (3H, d, *J* = 7.5 Hz, 18-CH<sub>3</sub>), 1.59 (3H, t, *J* = 7.8 Hz, 8<sup>2</sup>-CH<sub>3</sub>), 1.55 (12H, s, CH<sub>3</sub>(pin)). <sup>13</sup>C NMR (150 MHz, CDCl<sub>3</sub>), δ, ppm: 196.5, 173.4, 168.0, 161.0, 156.2, 150.6, 147.1, 147.0, 144.8, 143.6, 142.4, 138.7, 136.2, 134.4, 133.5, 131.5, 106.1, 105.3, 99.2, 92.5, 83.7, 51.6, 50.6, 48.6, 47.8, 30.6, 29.7, 29.5, 25.1, 24.7, 24.6, 23.5, 19.2, 12.8, 12.4. HRMS (MALDI-TOF), *m/z* found: 737.2834; calc. C<sub>40</sub>H<sub>46</sub>BN<sub>4</sub>O<sub>5</sub>Zn (MH<sup>+</sup>): 737.2853. UV-Vis (CH<sub>2</sub>Cl<sub>2</sub>), λ<sub>max</sub>, nm (A<sub>rel.</sub>): 426 (1.00), 520 (0.05), 561 (0.07), 611 (0.12), 661 (0.57).

### The methyl pyrophephorbide-*a* dimer (4)

A mixture of methyl (*E*)-3<sup>2</sup>-bromopyrophephorbide-*a* (**2a**) (40 mg, 0.064 mmol), bis(pinacolato)diboron (81.2 mg, 0.32 mmol), Pd(PPh<sub>3</sub>)<sub>4</sub> (14.8 mg, 0.013 mmol) and Cs<sub>2</sub>CO<sub>3</sub> (104 mg, 0.32 mmol) in 1,4-dioxane (3 mL) was stirred at 50 °C for 4 h, then the solvent was evaporated in vacuum, and the residue was purified by preparative TLC in a CH<sub>2</sub>Cl<sub>2</sub>/EtOH system (100:1) to give the product **4** (21 mg, 60%) as a brown solid.

<sup>1</sup>H NMR (600 MHz, CDCl<sub>3</sub>), δ, ppm: 9.49 (1H, s, 10-H), 9.48 (1H, s, 5-H), 8.69 (1H, s, 20-H), 8.09 (1H, d, *J* = 13.5 Hz, 3<sup>1</sup>-H), 7.76 (1H, d, *J* = 13.5 Hz, 3<sup>2</sup>-H), 5.30 (1H, d, *J* = 18.7 Hz, 13<sup>2</sup>-H<sup>a</sup>), 5.15 (1H, d, *J* = 18.7 Hz, 13<sup>2</sup>-H<sup>b</sup>), 4.59 (1H, q, *J* = 7.8 Hz, 18-H), 4.38 (1H, m, 17-H), 3.76 (2H, q, *J* = 7.8 Hz, 8<sup>1</sup>-CH<sub>2</sub>), 3.68 (3H, s, 17<sup>2</sup>-CO<sub>2</sub>CH<sub>3</sub>), 3.60 (3H, s, 2-CH<sub>3</sub>), 3.59 (3H, s, 12-CH<sub>3</sub>), 3.37 (3H, s, 7-CH<sub>3</sub>), 2.77 (1H, m, 17<sup>1</sup>-H<sup>a</sup>), 2.65 (1H, m, 17<sup>2</sup>-H<sup>a</sup>), 2.38 (2H, m, 17<sup>1</sup>-H<sup>b</sup> и 17<sup>2</sup>-H<sup>b</sup>), 1.93 (3H, d, *J* = 7.8 Hz, 18-CH<sub>3</sub>), 1.77 (3H, t, *J* = 7.8 Hz, 8<sup>2</sup>-CH<sub>3</sub>), 0.52 (1H, s, NH), -1.58 (1H, s, NH). <sup>13</sup>C NMR (150 MHz, CDCl<sub>3</sub>), δ, ppm: 196.0, 173.5, 171.3, 160.7, 155.1, 151.0, 149.0, 145.1, 141.5, 138.1, 137.3, 136.2, 136.1, 134.9, 131.0, 130.7, 128.6, 126.0, 106.2, 104.1, 96.8, 93.2, 51.9, 51.7, 50.0, 48.1, 31.0, 29.9, 23.2, 19.6, 17.5, 12.8, 12.0, 11.4. HRMS (MALDI-TOF), *m/z* found: 1095.5516; calc. C<sub>68</sub>H<sub>71</sub>N<sub>8</sub>O<sub>6</sub> (MH<sup>+</sup>): 1095.5497. UV-Vis (CH<sub>2</sub>Cl<sub>2</sub>), λ<sub>max</sub>, nm (A<sub>rel.</sub>): 413 (1.00), 514 (0.21), 554 (0.17), 625 (0.12), 692 (0.67).

## General procedure of the direct borylation of vinylporphyrins.

CuSCN (0.017 mmol, 0.2 eq.) and (2-biphenyl)dicyclohexylphosphine (CyJohnPhos) (0.036 mmol, 0.44 eq.) were added to 1 mL of freshly distilled 1,2-dichloroethane and stirred at room temperature for 30 minutes, then Li<sup>o</sup>Bu (0.17 mmol, 2 eq.), Ni(II) methyl pyrophephorbide-*a* (**1c**) 50 mg (0.083 mmol, 1 eq.), (2,2,6,6-tetramethylpiperidin-1-yl)oxyl (TEMPO) (0.33 mmol, 4 eq.), bispinacolborane ((Bpin)<sub>2</sub>) (0.33 mmol, 4 eq.) and 4 mL of 1,2-dichloroethane were added. The reaction mixture was stirred and refluxed for 15 hours, then the solvent was evaporated and the product was purified by column chromatography with CH<sub>2</sub>Cl<sub>2</sub> / MeOH (100:1) eluent, to yield 36.6 mg (60%) of Ni(II) methyl (*E*)-3<sup>2</sup>-(4,4,5,5-tetramethyl-1,3,2-dioxaborolane-2-yl)pyrophephorbide-*a* (**3c**) as a green powder.

**Ni(II) methyl (*E*)-3<sup>2</sup>-(4,4,5,5-tetramethyl-1,3,2-dioxaborolane-2-yl)pyrophephorbide-*a* (3c).** <sup>1</sup>H NMR (600 MHz, CDCl<sub>3</sub>), δ, ppm: 9.31 (1H, s, 10-H), 9.19 (1H, s, 5-H), 8.52 (1H, d, *J* = 18.7 Hz, Bpin-CH=CH), 8.21 (1H, s, 20-H), 6.52 (1H, d, *J* = 18.7 Hz, Bpin-CH=CH), 4.87 (1H, d, *J* = 19.2 Hz, 13<sup>2</sup>-H<sup>a</sup>), 4.8 (1H, d, *J* = 19.2 Hz, 13<sup>2</sup>-H<sup>b</sup>), 4.30 (1H, m, 18-H), 4.01 (1H, m, 17-H), 3.62 (3H, s, 12-CH<sub>3</sub>), 3.61 (2H, q, *J* = 7.8 Hz, 8<sup>1</sup>-CH<sub>2</sub>), 3.49 (3H, s, 17<sup>2</sup>-CO<sub>2</sub>CH<sub>3</sub>), 3.23 (3H, s, 2-CH<sub>3</sub>), 3.17 (3H, s, 7-CH<sub>3</sub>), 2.46 (1H, m, 17<sup>1</sup>-H<sup>a</sup>), 2.28 (2H, m, 17<sup>1</sup>-H<sup>b</sup>, 17<sup>2</sup>-H<sup>b</sup>), 2.13 (1H, m, 17<sup>2</sup>-H<sup>a</sup>), 1.63 (3H, t, *J* = 7.7 Hz, 8<sup>2</sup>-CH<sub>3</sub>), 1.55 (3H, d, *J* = 7.2 Hz, 18-CH<sub>3</sub>), 1.493 (6H, s, CH<sub>3</sub>), 1.488 (6H, s, CH<sub>3</sub>). <sup>13</sup>C NMR (150 MHz, CDCl<sub>3</sub>), δ, ppm: 195.4, 173.2, 161.8, 156.3, 148.9, 147.9, 144.6, 143.8, 141.4, 140.7, 140.0, 139.4, 136.4, 134.7, 133.8, 133.0, 129.7, 106.3, 105.1,

100.3, 93.4, 83.7, 51.7, 49.2, 48.7, 47.2, 30.6, 29.7, 25.0, 22.2, 19.4, 17.2, 12.5, 11.1. HRMS (MALDI-TOF),  $m/z$  found: 730.2855; calc.  $C_{40}H_{45}BN_4NiO_5$  ( $M^+$ ): 730.2836. UV-Vis ( $CH_2Cl_2$ ),  $\lambda_{max}$ , nm (log ( $\epsilon$  [ $L mol^{-1} cm^{-1}$ ])): 379 (4.56), 401 (4.68), 424 (4.67), 502 (3.43), 657 (4.72).

**Zn(II) dimethyl (*E,E*)-3<sup>2</sup>,8<sup>2</sup>-bis(4,4,5,5-tetramethyl-1,3,2-dioxaborolane-2-yl)protoporphyrin IX (7b).** Yield was 13 mg (38%) (deep dark red powder) from 25 mg (0.038 mmol) of the Zn(II) dimethyl protoporphyrin IX (6b).

<sup>1</sup>H NMR (600 MHz,  $CDCl_3$ ),  $\delta$ , ppm: 9.36 (1H, s, *meso*-H), 9.29 (1H, s, *meso*-H), 8.92 (1H, s, *meso*-H), 8.91 (1H, s, *meso*-H), 8.84 (1H, d,  $J = 18.6$  Hz, Bpin-CH=CH), 8.76 (1H, d,  $J = 18.6$  Hz, Bpin-CH=CH), 6.78 (1H, d,  $J = 18.6$  Hz, Bpin-CH=CH), 6.73 (1H, d,  $J = 18.6$  Hz, Bpin-CH=CH), 4.08 (4H, m,  $CH_2CH_2COOCH_3$ ), 3.65 (3H, s,  $CH_2CH_2COOCH_3$ ), 3.61 (3H, s,  $CH_2CH_2COOCH_3$ ), 3.51 (3H, s,  $CH_3$ ), 3.43 (3H, s,  $CH_3$ ), 3.41 (3H, s,  $CH_3$ ), 3.25 (3H, s,  $CH_3$ ), 3.09 (4H, m,  $CH_2CH_2COOCH_3$ ), 1.68 (24H, br.s,  $CH_3$ ). <sup>13</sup>C NMR (150 MHz,  $CDCl_3$ ),  $\delta$ , ppm: 173.6, 173.5, 147.4, 146.6, 146.2, 146.0, 145.0, 143.1, 143.0, 138.4, 138.2, 138.0, 137, 4,137.0, 136.5, 136.0, 135.8, 98.0, 97.1, 96.9, 95.4, 83.6, 51.6, 51.6, 36.8, 29, 7, 25.2, 21.7, 21.6, 13.3, 13.1, 11.7, 11.3. HRMS (MALDI-TOF),  $m/z$  found: 904.3756; calc.  $C_{48}H_{58}B_2N_4ZnO_8$  ( $M^+$ ): 904.3732. UV-Vis ( $CH_2Cl_2$ ),  $\lambda_{max}$ , nm ( $A_{rel}$ ): 417 (1.00), 544 (0.07), 583 (0.11).

**Ni(II) dimethyl (*E,E*)-3<sup>2</sup>,8<sup>2</sup>-bis(4,4,5,5-tetramethyl-1,3,2-dioxaborolane-2-yl)protoporphyrin IX (7c).** Yield was 84 mg (49%) (maroon amorphous solid) from 123 mg (0.19 mmol) of the Ni(II) dimethyl protoporphyrin IX (6c).

<sup>1</sup>H NMR (600 MHz,  $CDCl_3$ ),  $\delta$ , ppm: 9.52 (1H, s, *meso*-H), 9.45 (1H, s, *meso*-H), 9.38 (2H, br.s, *meso*-H), 8.70 (1H, d,  $J = 18.0$  Hz, Bpin-CH=CH), 8.66 (1H, d,  $J = 18.0$  Hz, Bpin-CH=CH), 6.60 (1H, d,  $J = 18.0$  Hz, Bpin-CH=CH), 6.58 (1H, d,  $J = 18.0$  Hz, Bpin-CH=CH), 4.10 (4H, m,  $CH_2CH_2COOCH_3$ ), 3.71 (3H, s,  $CH_2CH_2COOCH_3$ ), 3.70 (3H, s,  $CH_2CH_2COOCH_3$ ), 3.45 (3H, s,  $CH_3$ ), 3.41 (3H, s,  $CH_3$ ), 3.38 (3H, s,  $CH_3$ ), 3.34 (3H, s,  $CH_3$ ), 3.10 (4H, m,  $CH_2CH_2COOCH_3$ ), 1.58 (24H, br.s,  $CH_3$ ). <sup>13</sup>C NMR (150 MHz,  $CDCl_3$ ),  $\delta$ , ppm: 173.3, 141.9, 141.8, 141.6, 141.1, 140.9, 140.4, 139.5, 139.3, 139.1, 138.2, 137.7, 137.6, 137.0, 136.7, 98.3, 97.7, 97.3, 96.1, 83.6, 51.5, 36.6, 29.7, 24.9, 21.5, 13.8, 12.7, 12.6, 11.4. HRMS (MALDI-TOF),  $m/z$  found: 898.3814; calc.  $C_{48}H_{58}B_2N_4NiO_8$  ( $M^+$ ): 898.3794. UV-Vis ( $CH_2Cl_2$ ),  $\lambda_{max}$ , nm (log ( $\epsilon$  [ $L mol^{-1} cm^{-1}$ ])): 406 (5.1), 528 (3.95), 566 (4.4).

**Ni(II) (*E*)-5-(2-(4,4,5,5-tetramethyl-1,3,2-dioxaborolane-2-yl)ethenyl)-2,3,7,8,12,13,17,18-octaethylporphyrin (9).** Yield was 9.7 mg (62%) (maroon amorphous solid) from 13 mg (0.021 mmol) of the Ni (II) 5-vinyl-2,3,7,8,12,13,17,18-octaethylporphyrin (8).

<sup>1</sup>H NMR (600 MHz,  $CDCl_3$ ),  $\delta$ , ppm: 9.92 (1H, d,  $J = 18$  Hz, Bpin-CH=CH), 9.47 (2H, br.s, *meso*-H), 9.46 (1H, s, *meso*-H), 5.04 (1H, d,  $J = 18$  Hz, Bpin-CH=CH), 3.85 (16H, m,  $CH_2$ ), 1.80 (12H, m,  $CH_3$ ), 1.75 (6H, t,  $J = 7.70$  Hz,  $CH_3$ ), 1.61 (6H, t,  $J = 7.70$  Hz,  $CH_3$ ), 1.39 (12H, t,  $CH_3$ ). <sup>13</sup>C NMR (150 MHz,  $CDCl_3$ ),  $\delta$ , ppm: 144.5, 143.1, 142.8, 140.2, 139.5, 138.4, 138.3, 96.6, 95.9, 83.4, 24.8, 22.0, 19.6, 19.6, 19.5. HRMS (MALDI-TOF),  $m/z$  found: 742.3935; calc.  $C_{44}H_{57}BN_4NiO_2$  ( $M^+$ ): 742.3928. UV-Vis ( $CH_2Cl_2$ ),  $\lambda_{max}$ , nm (log ( $\epsilon$  [ $L mol^{-1} cm^{-1}$ ])): 404 (5.3), 528 (4.06), 562 (4.25).

**Ni(II) (*E*)-5-(2-(4,4,5,5-tetramethyl-1,3,2-dioxaborolane-2-yl)ethenyl)-2,3,7,8,12,13,17,18-octaethyl-17,18-trans-dihydroporphyrin (11).** Yield was 24.7 mg (41%) (green amorphous solid) from 50 mg (0.081 mmol) of the Ni (II) 5-vinyl-2,3,7,8,12,13,17,18-octaethyl-17,18-trans-dihydroporphyrin (10).

<sup>1</sup>H NMR (600 MHz,  $CDCl_3$ ),  $\delta$ , ppm: 8.91 (1H, s, *meso*-H), 8.86 (1H, s, *meso*-H), 8.64 (1H, d,  $J = 18.0$  Hz, Bpin-CH=CH), 7.88 (1H, s, *meso*-H), 5.29 (1H, d,  $J = 18.0$  Hz, Bpin-CH=CH), 4.24 (1H, m, 17-H), 3.91 (1H, m, 18-H), 3.65-3.34 (12H, m,  $CH_2CH_3$ ), 1.81 (2H, m, 18- $CH_2CH_3$ ), 1.62 (18H, m,  $CH_2CH_3$ ), 1.45 (2H, m, 17- $CH_2CH_3$ ), 1.38 (6H, br.s,  $CH_3$ ), 1.37 (6H, br.s,  $CH_3$ ), 1.04 (3H, t,  $J = 7.5$  Hz, 17- $CH_2CH_3$ ), 0.89 (3H, t,  $J = 7.5$  Hz, 18- $CH_2CH_3$ ). <sup>13</sup>C NMR (150 MHz,  $CDCl_3$ ),  $\delta$ , ppm: 144.4, 133.6, 143.4, 139.5, 139.3, 138.4, 138.3, 138.1, 137.6, 136.7, 135.2, 106.4, 101.9, 100.7, 93.0, 83.2, 54.2, 53.9, 29.7, 27.5, 25.6, 24.9, 24.6, 20.9, 19.4, 19.3, 19.1, 19.0, 18.1. HRMS (MALDI-TOF),  $m/z$  found: 744.4098; calc.  $C_{44}H_{59}BN_4NiO_2$  ( $M^+$ ): 744.4085. UV-Vis ( $CH_2Cl_2$ ),  $\lambda_{max}$ , nm (log ( $\epsilon$  [ $L mol^{-1} cm^{-1}$ ])): 410 (4.99), 502 (3.71), 630 (4.49).

(*E*)-configuration of all the borylated C=C double bonds was confirmed by the large constant of the spin coupling between *trans*-protons (18 Hz) in the <sup>1</sup>H NMR spectra of the products.

### Demetalation of the metal porphyrin complex

Zn(II) dimethyl (*E,E*)-3<sup>2</sup>,8<sup>2</sup>-bis(4,4,5,5-tetramethyl-1,3,2-dioxaborolane-2-yl)protoporphyrin IX (7b) (12.8 mg, 0.014 mmol) was dissolved in  $CH_2Cl_2$  (3 mL) and a solution of 0.15% HCl in trifluoroacetic acid (12 mL) was added, and the mixture was stirred for 5 min at ambient temperature. Then the mixture was diluted with  $CH_2Cl_2$  (50 mL) and neutralized with aqueous  $NaHCO_3$ , the organic layer was dried over anhydrous sodium sulfate. The resulting supernatant was passed through a pad of silica gel and the solvent was evaporated. The residue was recrystallized from  $CH_2Cl_2/MeOH$  to yield 5 mg (50%) of dimethyl (*E,E*)-3<sup>2</sup>,8<sup>2</sup>-bis(4,4,5,5-tetramethyl-1,3,2-dioxaborolane-2-yl)protoporphyrin IX (7a) as a purple powder. <sup>1</sup>H NMR and UV-Vis spectra of 7a corresponds to the previously reported.<sup>10</sup>

**Dimethyl (*E,E*)-3<sup>2</sup>,8<sup>2</sup>-bis(4,4,5,5-tetramethyl-1,3,2-dioxaborolane-2-yl)protoporphyrin IX (7a).** <sup>1</sup>H NMR (600 MHz,  $CDCl_3$ ),  $\delta$ , ppm: 10.22 (1H, s, *meso*-H), 10.18 (1H, s, *meso*-H), 10.06 (1H, s, *meso*-H), 10.01 (1H, s, *meso*-H), 9.02 (1H, d,  $J = 18.6$  Hz, Bpin-CH=CH), 9.01 (1H, d,  $J = 18.6$  Hz, Bpin-CH=CH), 6.90 (1H, d,  $J = 18.6$  Hz, Bpin-CH=CH), 6.89 (1H, d,  $J = 18.6$  Hz, Bpin-CH=CH), 4.40 (4H, t,  $J = 7.86$  Hz,  $CH_2CH_2COOCH_3$ ), 3.77 (6H, br.s,  $CH_2CH_2COOCH_3$ ), 3.70 (3H, s,  $CH_3$ ), 3.69 (3H, s,  $CH_3$ ), 3.66 (3H, s,  $CH_3$ ), 3.64 (3H, s,  $CH_3$ ), 3.31 (4H, t,  $J = 7.86$  Hz,  $CH_2CH_2COOCH_3$ ), 1.56 (24H, br.s,  $CH_3$ ), -3.89 (2H, s, NH). UV-Vis ( $CH_2Cl_2$ ),  $\lambda_{max}$ , nm ( $A_{rel}$ ): 412 (1.00), 509 (0.09), 546 (0.08), 579 (0.04), 634 (0.03).

### General procedure of the Suzuki reaction on the example of methyl (*E*)-3<sup>2</sup>-phenylpyropheophorbide-*a* (**3a**)

To a 0.03M solution of borylated porphyrinoid in 1,4-dioxane 5 mol% Pd(PPh<sub>3</sub>)<sub>4</sub>, 2 eq. K<sub>2</sub>CO<sub>3</sub> and 2 eq. aryl iodide were consecutively added, and the mixture was stirred at 80 °C for 1 h. Then the solvent was evaporated in vacuum, the residue was dissolved in CH<sub>2</sub>Cl<sub>2</sub> (10 ml), washed by water (2x5 ml), the solvent was evaporated in vacuum, and the residue was purified by preparative TLC in a CH<sub>2</sub>Cl<sub>2</sub>/EtOH system (100:1) to give products.

**Methyl (*E*)-3<sup>2</sup>-phenylpyropheophorbide-*a* (**12a**).** The reaction was performed at 70 °C for 12 h. The product **12a** (12 mg, 65%) was obtained as a brown solid from (*E*)-3<sup>2</sup>-(4,4,5,5-tetramethyl-1,3,2-dioxaborolane-2-yl)pyropheophorbide-*a* (**3a**) (20 mg, 0.03 mmol) and iodobenzene (12 mg, 0.06 mmol). <sup>1</sup>H NMR spectrum of **12a** corresponds to the previously reported.<sup>4</sup>

<sup>1</sup>H NMR (600 MHz, CDCl<sub>3</sub>), δ, ppm: 9.59 (1H, s, 10-H), 9.50 (1H, s, 5-H), 8.65 (1H, s, 20-H), 8.37 (1H, d, *J* = 16.5 Hz, 3<sup>1</sup>-H), 7.89 (2H, d, *J* = 7.5 Hz, 3<sup>4a</sup>-H, 3<sup>4b</sup>-H), 7.64 (1H, d, *J* = 16.5 Hz, 3<sup>2</sup>-H), 7.59 (2H, t, *J* = 7.5 Hz, 3<sup>5a</sup>-H, 3<sup>5b</sup>-H), 7.49 (1H, m, 3<sup>6</sup>-H), 5.31 (1H, d, *J* = 19.3 Hz, 13<sup>2</sup>-H<sup>a</sup>), 5.15 (1H, d, *J* = 19.3 Hz, 13<sup>2</sup>-H<sup>b</sup>), 4.55 (1H, q, *J* = 7.5 Hz, 18-H), 4.34 (1H, m, 17-H), 3.74 (2H, q, *J* = 7.8 Hz, 8<sup>1</sup>-CH<sub>2</sub>), 3.71 (3H, s, 12-CH<sub>3</sub>), 3.65 (3H, s, 17<sup>2</sup>-CO<sub>2</sub>CH<sub>3</sub>), 3.49 (3H, s, 2-CH<sub>3</sub>), 3.27 (3H, s, 7-CH<sub>3</sub>), 2.75 (1H, m, 17<sup>1</sup>-H<sup>a</sup>), 2.61 (1H, m, 17<sup>2</sup>-H<sup>a</sup>), 2.35 (2H, m, 17<sup>1</sup>-H<sup>b</sup>, 17<sup>2</sup>-H<sup>b</sup>), 1.87 (3H, d, *J* = 7.5 Hz, 18-CH<sub>3</sub>), 1.73 (3H, t, *J* = 7.8 Hz, 8<sup>2</sup>-CH<sub>3</sub>), 0.36 (1H, s, NH), -1.65 (1H, s, NH). UV-Vis (CH<sub>2</sub>Cl<sub>2</sub>), λ<sub>max</sub>, nm (A<sub>rel.</sub>): 419 (1.00), 512 (0.11), 542 (0.09), 615 (0.08), 673 (0.44).

**Zn(II) methyl (*E*)-3<sup>2</sup>-phenylpyropheophorbide-*a* (**12b**).** PdCl<sub>2</sub>(CH<sub>3</sub>CN)<sub>2</sub> (1.2 mg, 0.0046 mmol) and dppp (2 mg, 0.005 mmol) were used as a precatalyst instead of Pd(PPh<sub>3</sub>)<sub>4</sub>. The product **12b** (14 mg, 75 %) was obtained as a green solid from Zn(II) methyl (*E*)-3<sup>2</sup>-bromopyropheophorbide-*a* (**2b**) (20 mg, 0.027 mmol) and iodobenzene (12 mg, 0.06 mmol).

<sup>1</sup>H NMR (600 MHz, CDCl<sub>3</sub>), δ, ppm: 9.06 (1H, s, 10-H), 8.87 (1H, s, 5-H), 8.39 (1H, s, 20-H), 8.14 (1H, d, *J* = 16.5 Hz, 3<sup>1</sup>-H), 7.82 (2H, d, *J* = 7.5 Hz, 3<sup>4a</sup>-H, 3<sup>4b</sup>-H), 7.58 (2H, t, *J* = 7.5 Hz, 3<sup>5a</sup>-H, 3<sup>5b</sup>-H), 7.47 (1H, t, *J* = 7.5 Hz, 3<sup>6</sup>-H), 7.39 (1H, d, *J* = 16.5 Hz, 3<sup>2</sup>-H), 4.78 (1H, d, *J* = 18.9 Hz, 13<sup>2</sup>-H<sup>a</sup>), 4.69 (1H, d, *J* = 18.9 Hz, 13<sup>2</sup>-H<sup>b</sup>), 4.41 (1H, m, 18-H), 4.15 (1H, m, 17-H), 3.46 (3H, s, 17<sup>2</sup>-CO<sub>2</sub>CH<sub>3</sub>), 3.41 (5H, m, 12-CH<sub>3</sub>, 8<sup>1</sup>-CH<sub>2</sub>), 3.32 (3H, s, 2-CH<sub>3</sub>), 2.30 (3H, s, 7-CH<sub>3</sub>), 2.53 (1H, m, 17<sup>1</sup>-H<sup>a</sup>), 2.47 (1H, m, 17<sup>2</sup>-H<sup>a</sup>), 2.22 (2H, m, 17<sup>1</sup>-H<sup>b</sup>, 17<sup>2</sup>-H<sup>b</sup>), 1.88 (3H, d, *J* = 7.5 Hz, 18-CH<sub>3</sub>), 1.55 (3H, t, *J* = 7.7 Hz, 8<sup>2</sup>-CH<sub>3</sub>). <sup>13</sup>C NMR (150 MHz, CDCl<sub>3</sub>), δ, ppm: 196.5, 173.4, 168.2, 165.3, 161.1, 156.1, 153.8, 150.5, 147.2, 146.9, 144.6, 143.6, 138.3, 138.0, 134.3, 134.2, 133.8, 133.1, 129.7, 129.0, 126.7, 121.4, 106.6, 105.2, 98.6, 92.4, 62.7, 51.6, 50.5, 18.6, 47.8, 30.7, 29.7, 29.5, 25.1, 23.5, 19.1, 17.3, 12.6, 10.7. HRMS (MALDI-TOF), *m/z* found: 687.2336; calc. C<sub>40</sub>H<sub>39</sub>N<sub>4</sub>O<sub>3</sub>Zn (MH<sup>+</sup>): 687.2314. UV-Vis (CH<sub>2</sub>Cl<sub>2</sub>), λ<sub>max</sub>, nm (log (ε [L mol<sup>-1</sup> cm<sup>-1</sup>])): 424 (6.90), 517 (5.48), 560 (5.63), 611 (5.96), 661 (6.69).

**Zn(II) methyl (*E*)-3<sup>2</sup>-(4-methylphenyl)pyropheophorbide-*a* (**13b**).** The product **13b** (10 mg, 53%) was obtained as a green solid from Zn(II) methyl (*E*)-3<sup>2</sup>-(4,4,5,5-tetramethyl-1,3,2-dioxaborolane-2-yl)pyropheophorbide-*a* (**3b**) (20 mg, 0.03 mmol) and 4-iodotoluene (13 mg, 0.06 mmol).

<sup>1</sup>H NMR (600 MHz, CDCl<sub>3</sub>), δ, ppm: 8.99 (1H, s, 10-H), 8.75 (1H, s, 5-H), 8.34 (1H, s, 20-H), 7.98 (1H, d, *J* = 16.5 Hz, 3<sup>1</sup>-H), 7.66 (2H, d, *J* = 7.6 Hz, 3<sup>4a</sup>-H, 3<sup>4b</sup>-H), 7.37 (2H, d, *J* = 7.6 Hz, 3<sup>5a</sup>-H, 3<sup>5b</sup>-H), 7.27 (1H, d, *J* = 16.5 Hz, 3<sup>2</sup>-H), 4.79 (1H, d, *J* = 18.6 Hz, 13<sup>2</sup>-H<sup>a</sup>), 4.69 (1H, d, *J* = 18.6 Hz, 13<sup>2</sup>-H<sup>b</sup>), 4.40 (1H, m, 18-H), 4.13 (1H, m, 17-H), 3.50 (3H, s, 17<sup>2</sup>-CO<sub>2</sub>CH<sub>3</sub>), 3.41 (3H, s, 12-CH<sub>3</sub>), 3.38 (2H, q, *J* = 7.7 Hz, 8<sup>1</sup>-CH<sub>2</sub>), 3.25 (3H, s, 2-CH<sub>3</sub>), 2.91 (3H, s, 7-CH<sub>3</sub>), 2.53 (4H, m, 3<sup>6</sup>-CH<sub>3</sub>, 17<sup>1</sup>-H<sup>a</sup>), 2.48 (1H, m, 17<sup>2</sup>-H<sup>a</sup>), 2.22 (2H, m, 17<sup>1</sup>-H<sup>b</sup>, 17<sup>2</sup>-H<sup>b</sup>), 1.89 (3H, d, *J* = 7.4 Hz, 18-CH<sub>3</sub>), 1.52 (3H, t, *J* = 7.7 Hz, 8<sup>2</sup>-CH<sub>3</sub>). <sup>13</sup>C NMR (150 MHz, CDCl<sub>3</sub>), δ, ppm: 196.5, 173.4, 168.1, 161.1, 156.1, 153.9, 146.8, 143.4, 138.1, 135.2, 135.0, 134.1, 133.8, 132.9, 129.6, 128.9, 126.6, 126.5, 120.3, 106.1, 105.2, 98.5, 92.3, 51.6, 50.6, 48.6, 47.8, 31.9, 30.7, 29.7, 29.5, 23.4, 22.7, 21.7, 21.4, 19.1, 17.2, 14.1, 12.5, 12.4, 10.6. HRMS (MALDI-TOF), *m/z* found: 701.2492; calc. C<sub>41</sub>H<sub>41</sub>N<sub>4</sub>O<sub>3</sub>Zn (MH<sup>+</sup>): 701.2470. UV-Vis (CH<sub>2</sub>Cl<sub>2</sub>), λ<sub>max</sub>, nm (log (ε [L mol<sup>-1</sup> cm<sup>-1</sup>])): 426 (6.69), 520 (5.40), 561 (5.49), 613 (5.77), 662 (6.52).

**Methyl (*E*)-3<sup>2</sup>-(3-nitrophenyl)pyropheophorbide-*a* (**14a**).** The reaction was performed at 75 °C for 22 h. The product **14a** (17 mg, 86 %) was obtained as a brown solid from methyl (*E*)-3<sup>2</sup>-(4,4,5,5-tetramethyl-1,3,2-dioxaborolane-2-yl)pyropheophorbide-*a* (**3a**) (20 mg, 0.03 mmol) and 3-nitroiodobenzene (15 mg, 0.06 mmol).

<sup>1</sup>H NMR (600 MHz, CDCl<sub>3</sub>), δ, ppm: 9.59 (1H, s, 10-H), 9.46 (1H, s, 5-H), 8.72 (1H, m, 3<sup>4</sup>-H), 8.67 (1H, s, 20-H), 8.51 (1H, d, *J* = 16.5 Hz, 3<sup>1</sup>-H), 8.31 (1H, m, 3<sup>6</sup>-H), 8.15 (1H, d, *J* = 7.8 Hz, 3<sup>8</sup>-H), 7.75 (1H, t, *J* = 7.8 Hz, 3<sup>7</sup>-H), 7.66 (1H, d, *J* = 16.5 Hz, 3<sup>2</sup>-H), 5.31 (1H, d, *J* = 19.2 Hz, 13<sup>2</sup>-H<sup>a</sup>), 5.16 (1H, d, *J* = 19.2 Hz, 13<sup>2</sup>-H<sup>b</sup>), 4.56 (1H, dq, *J* = 7.4 Hz, *J* = 1.9 Hz, 18-H), 4.36 (1H, m, 17-H), 3.75 (2H, q, *J* = 7.8 Hz, 8<sup>1</sup>-CH<sub>2</sub>), 3.72 (3H, s, 12-CH<sub>3</sub>), 3.65 (3H, s, 17<sup>2</sup>-CO<sub>2</sub>CH<sub>3</sub>), 3.53 (3H, s, 2-CH<sub>3</sub>), 3.30 (3H, s, 7-CH<sub>3</sub>), 2.75 (1H, m, 17<sup>1</sup>-H<sup>a</sup>), 2.61 (1H, m, 17<sup>2</sup>-H<sup>a</sup>), 2.35 (2H, m, 17<sup>1</sup>-H<sup>b</sup>, 17<sup>2</sup>-H<sup>b</sup>), 1.87 (3H, d, *J* = 7.4 Hz, 18-CH<sub>3</sub>), 1.75 (3H, t, *J* = 7.8 Hz, 8<sup>2</sup>-CH<sub>3</sub>), 0.10 (1H, s, NH), -1.68 (1H, s, NH). <sup>13</sup>C NMR (150 MHz, CDCl<sub>3</sub>), δ, ppm: 196.0, 173.4, 171.2, 149.0, 145.1, 141.1, 139.4, 138.2, 136.2, 135.9, 134.2, 134.0, 132.5, 132.0, 130.8, 128.9, 123.9, 122.7, 121.3, 106.4, 104.2, 97.0, 93.4, 51.8, 51.7, 50.0, 48.1, 31.0, 29.9, 29.7, 23.2, 19.5, 17.4, 12.6, 12.1, 11.4. HRMS (MALDI-TOF), *m/z* found: 670.2998; calc. C<sub>40</sub>H<sub>40</sub>N<sub>5</sub>O<sub>5</sub> (MH<sup>+</sup>): 670.3029. UV-Vis (CH<sub>2</sub>Cl<sub>2</sub>), λ<sub>max</sub>, nm (A<sub>rel.</sub>): 421 (1.00), 518 (0.09), 550 (0.08), 621 (0.06), 679 (0.42).

**Zn(II) methyl (*E*)-3<sup>2</sup>-(3-nitrophenyl)pyropheophorbide-*a* (**14b**).** The product **14b** (10 mg, 50 %) was obtained as a green solid from Zn(II) methyl (*E*)-3<sup>2</sup>-(4,4,5,5-tetramethyl-1,3,2-dioxaborolane-2-yl)pyropheophorbide-*a* (**3b**) (20 mg, 0.03 mmol) and 3-nitroiodobenzene (15 mg, 0.06 mmol).

<sup>1</sup>H NMR (600 MHz, CDCl<sub>3</sub>), δ, ppm: 9.53 (1H, s, 10-H), 9.27 (1H, s, 5-H), 8.58 (1H, s, 3<sup>4</sup>-H), 8.45 (1H, s, 20-H), 8.40 (1H, d, *J* = 16.4 Hz, 3<sup>1</sup>-H), 8.18 (1H, d, *J* = 7.8 Hz, 3<sup>6</sup>-H), 7.98 (1H, d, *J* = 7.8 Hz, 3<sup>8</sup>-H), 7.60 (1H, t, *J* = 7.8 Hz, 3<sup>7</sup>-H), 7.45 (1H, d, *J* = 16.4 Hz, 3<sup>2</sup>-H), 5.08 (1H, d, *J* = 18.9 Hz, 13<sup>2</sup>-CH<sup>2a</sup>), 4.92 (1H, d, *J* = 18.9 Hz, 13<sup>2</sup>-CH<sup>2b</sup>), 4.49 (1H, q, *J* = 7.3 Hz, 18-H), 4.29 (1H, m, 17-H), 3.76 (2H, q, *J* = 7.7 Hz, 8<sup>1</sup>-CH<sub>2</sub>), 3.52 (3H, s, 12-CH<sub>3</sub>), 3.45 (3H, s, 17<sup>2</sup>-CO<sub>2</sub>CH<sub>3</sub>), 3.41 (3H, s, 2-CH<sub>3</sub>), 3.28 (3H, s, 7-CH<sub>3</sub>), 2.64 (1H, m, 17<sup>1</sup>-CH<sup>2a</sup>), 2.52 (1H, m, 17<sup>2</sup>-CH<sup>2a</sup>), 2.29 (2H, m, 17<sup>1</sup>-CH<sup>2b</sup>, 17<sup>2</sup>-CH<sup>2b</sup>),

1.87 (3H, d,  $J = 7.3$  Hz, 18-CH<sub>3</sub>), 1.75 (3H, t,  $J = 7.7$  Hz, 8<sup>2</sup>-CH<sub>3</sub>). <sup>13</sup>C NMR (150 MHz, CDCl<sub>3</sub>),  $\delta$ , ppm: 197.0, 173.9, 168.2, 055.7, 151.3, 147.7, 147.3, 145.6, 143.9, 137.2, 135.4, 134.5, 133.6, 132.1, 131.8, 129.7, 125.0, 122.0, 121.0, 106.2, 105.3, 98.4, 92.2, 51.6, 50.7, 49.8, 49.5, 49.2, 48.8, 48.2, 31.9, 30.7, 23.5, 22.6, 19.5, 17.4, 14.0, 12.7, 12.5, 11.0. HRMS (MALDI-TOF),  $m/z$  found: 732.2176; calc. C<sub>40</sub>H<sub>38</sub>N<sub>5</sub>O<sub>5</sub>Zn (MH<sup>+</sup>): 732.2164. UV-Vis (CH<sub>2</sub>Cl<sub>2</sub>),  $\lambda_{\max}$ , nm (log  $\epsilon$  [L mol<sup>-1</sup> cm<sup>-1</sup>]): 379 (6.60), 427 (6.81), 522 (5.60), 559 (5.70), 616 (5.90), 665 (6.65).

**Zn(II) methyl (*E*)-3<sup>2</sup>-(4-acetophenyl)pyropheophorbide-*a* (15b).** The product **15b** (10 mg, 51%) was obtained as a green solid from methyl (*E*)-3<sup>2</sup>-(4,4,5,5-tetramethyl-1,3,2-dioxaborolane-2-yl)pyropheophorbide-*a* **3b** (20 mg, 0.03 mmol) and 4-iodoacetophenone (16 mg, 0.06 mmol).

<sup>1</sup>H NMR (600 MHz, CDCl<sub>3</sub>),  $\delta$ , ppm: 9.15 (1H, s, 10-H), 8.87 (1H, s, 5-H), 8.40 (1H, s, 20-H), 8.17 (1H, d,  $J = 16.3$  Hz, 3<sup>1</sup>-H), 8.07 (2H, d,  $J = 8.0$  Hz, 3<sup>5a</sup>-H, 3<sup>5b</sup>-H), 7.76 (2H, d,  $J = 8.0$  Hz, 3<sup>6a</sup>-H, 3<sup>6b</sup>-H), 7.30 (1H, d,  $J = 16.3$  Hz, 3<sup>2</sup>-H), 4.82 (1H, d,  $J = 18.7$  Hz, 13<sup>2</sup>-H<sup>a</sup>), 4.71 (1H, d,  $J = 18.7$  Hz, 13<sup>2</sup>-H<sup>b</sup>), 4.43 (1H, m, 18-H), 4.16 (1H, m, 17-H), 3.49 (5H, m, 8<sup>1</sup>-CH<sub>2</sub>, 17<sup>2</sup>-CO<sub>2</sub>CH<sub>3</sub>), 3.44 (3H, s, 12-CH<sub>3</sub>), 3.29 (3H, s, 2-CH<sub>3</sub>), 3.03 (3H, s, 7-CH<sub>3</sub>), 2.70 (3H, s, 3<sup>7</sup>-CH<sub>3</sub>), 2.55 (1H, m, 17<sup>1</sup>-H<sup>a</sup>), 2.49 (1H, m, 17<sup>2</sup>-H<sup>a</sup>), 2.25 (2H, m, 17<sup>1</sup>-H<sup>b</sup>, 17<sup>2</sup>-H<sup>b</sup>), 1.88 (3H, d,  $J = 7.4$  Hz, 18-CH<sub>3</sub>), 1.59 (3H, t,  $J = 7.8$  Hz, 8<sup>2</sup>-CH<sub>3</sub>). <sup>13</sup>C NMR (150 MHz, CDCl<sub>3</sub>),  $\delta$ , ppm: 197.5, 196.5, 173.4, 168.0, 161.1, 156.3, 153.4, 147.2, 146.8, 144.9, 143.6, 142.4, 137.4, 136.2, 134.8, 134.5, 133.3, 131.6, 129.0, 126.5, 124.1, 106.2, 105.3, 98.5, 92.4, 51.6, 50.6, 48.6, 47.9, 31.9, 30.7, 29.7, 29.6, 29.4, 26.6, 22.7, 29.2, 17.3, 14.1, 12.7, 12.5, 10.8. HRMS (MALDI-TOF),  $m/z$  found: 729.2433; calc. C<sub>42</sub>H<sub>41</sub>N<sub>4</sub>O<sub>4</sub>Zn (MH<sup>+</sup>): 729.2419. UV-Vis (CH<sub>2</sub>Cl<sub>2</sub>),  $\lambda_{\max}$ , nm (A<sub>rel.</sub>): 429 (1.00), 522 (0.03), 563 (0.05), 617 (0.12), 667 (0.74).

**Ni(II) (*E*)-5-(2-(3-nitrophenyl)ethenyl)-2,3,7,8,12,13,17,18-octaethylporphyrin (16).** The reaction was performed at 90 °C for 1.5 h, using 10 mol% Pd(PPh<sub>3</sub>)<sub>4</sub> and 6 eq. Cs<sub>2</sub>CO<sub>3</sub>. The product **16** (15 mg, 50%) was obtained as a green solid from Ni(II) (*E*)-5-(2-(4,4,5,5-tetramethyl-1,3,2-dioxaborolane-2-yl)ethenyl)-2,3,7,8,12,13,17,18-octaethylporphyrin (**9**) (30 mg, 0.04 mmol) and 3-nitroiodobenzene (20 mg, 0.08 mmol).

<sup>1</sup>H NMR (600 MHz, CD<sub>2</sub>Cl<sub>2</sub>),  $\delta$ , ppm: 9.63 (1H, d,  $J = 16$  Hz, Ar-CH = CH), 9.55 (2H, br.s, *meso*-H), 9.54 (1H, s, *meso*-H), 8.44 (1H, m, 3<sup>4</sup>-H), 8.17 (1H, m, 3<sup>6</sup>-H), 7.83 (1H, m, 3<sup>8</sup>-H), 7.58 (1H, t,  $J = 8$  Hz, 3<sup>7</sup>-H), 5.85 (1H, d,  $J = 16$  Hz, Ar-CH = CH), 3.89 (16H, m, CH<sub>2</sub>), 1.84 (12H, m, CH<sub>3</sub>), 1.77 (6H, t,  $J = 7.70$  Hz, CH<sub>3</sub>), 1.69 (6H, t,  $J = 7.70$  Hz, CH<sub>3</sub>). <sup>13</sup>C NMR (150 MHz, CD<sub>2</sub>Cl<sub>2</sub>),  $\delta$ , ppm: 148.98, 145.56, 144.30, 143.47, 143.16, 140.33, 139.69, 139.03, 138.92, 138.39, 131.98, 131.06, 129.90, 122.19, 120.49, 110.20, 96.91, 96.35, 29.69, 22.17, 19.47, 17.98, 16.25. HRMS (MALDI-TOF),  $m/z$  found: 738.3342; calc. C<sub>44</sub>H<sub>50</sub>N<sub>5</sub>O<sub>2</sub>Ni (MH<sup>+</sup>): 738.3318. UV-Vis (CH<sub>2</sub>Cl<sub>2</sub>),  $\lambda_{\max}$ , nm (A<sub>rel.</sub>): 405 (1.00), 529 (0.06), 563.5 (0.9).

**Ni(II) (*E*)-5-(2-(4-methylphenyl)ethenyl)-2,3,7,8,12,13,17,18-octaethylporphyrin (17) and Ni(II) (*E*)-5-(2-phenylethenyl)-2,3,7,8,12,13,17,18-octaethylporphyrin (18).**<sup>11</sup> The reaction was performed at 90 °C for 1.5 h, using 10 mol% Pd(PPh<sub>3</sub>)<sub>4</sub> and 6 eq. Cs<sub>2</sub>CO<sub>3</sub>. The mixture of products **17**, **18** (15 mg, total yield 53%) was obtained as a green solid from Ni(II) (*E*)-5-(2-(4,4,5,5-tetramethyl-1,3,2-dioxaborolane-2-yl)ethenyl)-2,3,7,8,12,13,17,18-octaethylporphyrin (**9**) (30 mg, 0.04 mmol) and 4-iodotoluene (18 mg, 0.08 mmol).

<sup>1</sup>H NMR (600 MHz, CD<sub>2</sub>Cl<sub>2</sub>),  $\delta$ , ppm: 9.553 (1H, s, *meso*-H (**18**)), 9.545 (2H, s, *meso*-H (**17**)), 9.54 (1H, s, *meso*-H (**18**)), 9.533 (1H, s, *meso*-H (**17**)), 9.50 (1H, d,  $J = 16$  Hz, Ph-CH = CH (**18**)), 9.43 (1H, d,  $J = 15.9$  Hz, Ar-CH = CH (**17**)), 7.61 (2H, m, C<sub>6</sub>H<sub>5</sub> (**18**)), 7.50 (2H, m, C<sub>6</sub>H<sub>4</sub> (**17**)), 7.47 (2H, m, C<sub>6</sub>H<sub>5</sub> (**18**)), 7.37 (1H, m, C<sub>6</sub>H<sub>5</sub> (**18**)), 7.28 (2H, m, C<sub>6</sub>H<sub>4</sub> (**17**)), 5.79 (1H, d,  $J = 16$  Hz, Ph-CH = CH (**18**)), 5.75 (1H, d,  $J = 15.9$  Hz, Ar-CH = CH (**17**)), 3.90 (16H, m, CH<sub>2</sub> (**17**, **18**)), 2.44 (3H, s, CH<sub>3</sub>-C<sub>6</sub>H<sub>4</sub> (**17**, **18**)), 1.84 (12H, m, CH<sub>3</sub> (**17**, **18**)), 1.77 (6H, m, CH<sub>3</sub> (**17**, **18**)), 1.71 (6H, m, CH<sub>3</sub> (**17**, **18**)). <sup>13</sup>C NMR (150 MHz, CD<sub>2</sub>Cl<sub>2</sub>),  $\delta$ , ppm: 148.98, 145.56, 144.30, 143.47, 143.16, 140.33, 139.69, 139.03, 138.92, 138.39, 131.98, 131.06, 129.90, 122.19, 120.49, 110.20, 96.91, 96.35, 29.69, 22.17, 19.47, 17.98, 16.25, 145.25, 145.19, 144.73, 144.69, 143.29, 143.24, 143.01, 141.07, 141.03, 140.24, 139.53, 139.49, 139.18, 139.12, 138.25, 138.22, 137.92, 137.59, 134.92, 129.54, 128.87, 127.90, 127.83, 126.87, 126.25, 126.16, 112.06, 111.75, 96.71, 96.68, 95.99, 29.70, 22.16, 20.98, 19.50, 19.45, 18.03, 17.98, 17.96, 16.59. HRMS (MALDI-TOF),  $m/z$  found: 693.3492, 707.3655; calc. **17** C<sub>45</sub>H<sub>53</sub>N<sub>4</sub>Ni (MH<sup>+</sup>): 707.3624, **18** C<sub>44</sub>H<sub>51</sub>N<sub>4</sub>Ni (MH<sup>+</sup>): 693.3467.

NMR spectra

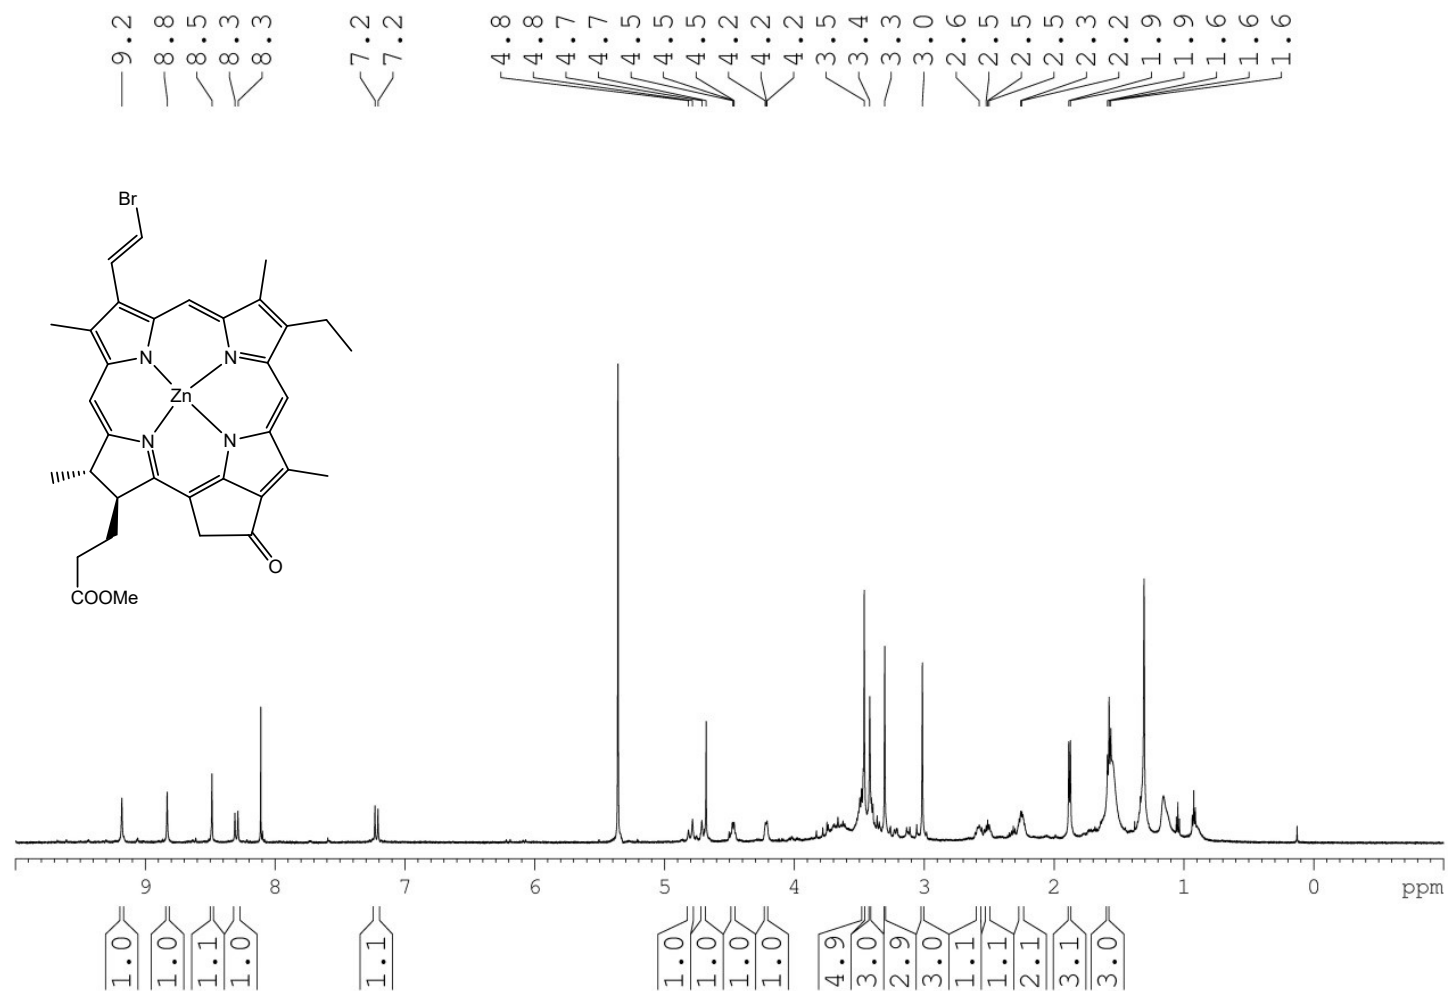

Fig. S1. <sup>1</sup>H NMR spectrum of Zn(II) methyl (*E*)-3<sup>2</sup>-bromopyropheophorbide-*a* (**2b**) in CDCl<sub>3</sub>.

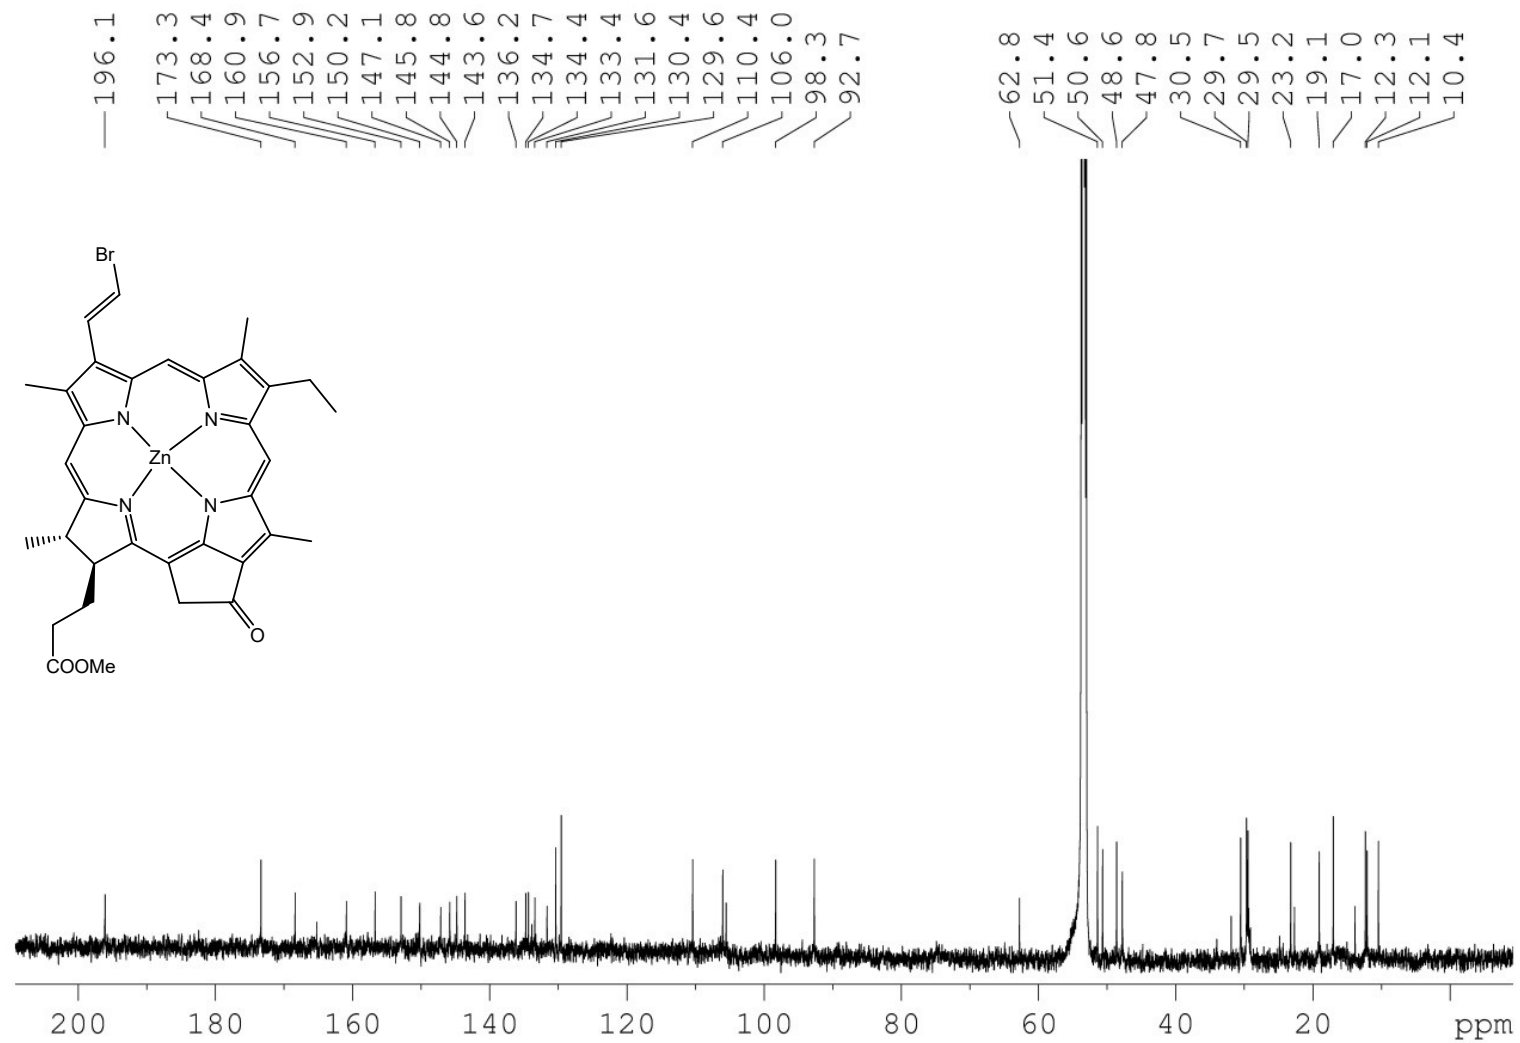

**Fig. S2.** <sup>13</sup>C NMR spectrum of Zn(II) methyl (*E*)-3<sup>2</sup>-bromopyropheophorbide-*a* (**2b**) in CDCl<sub>3</sub>.

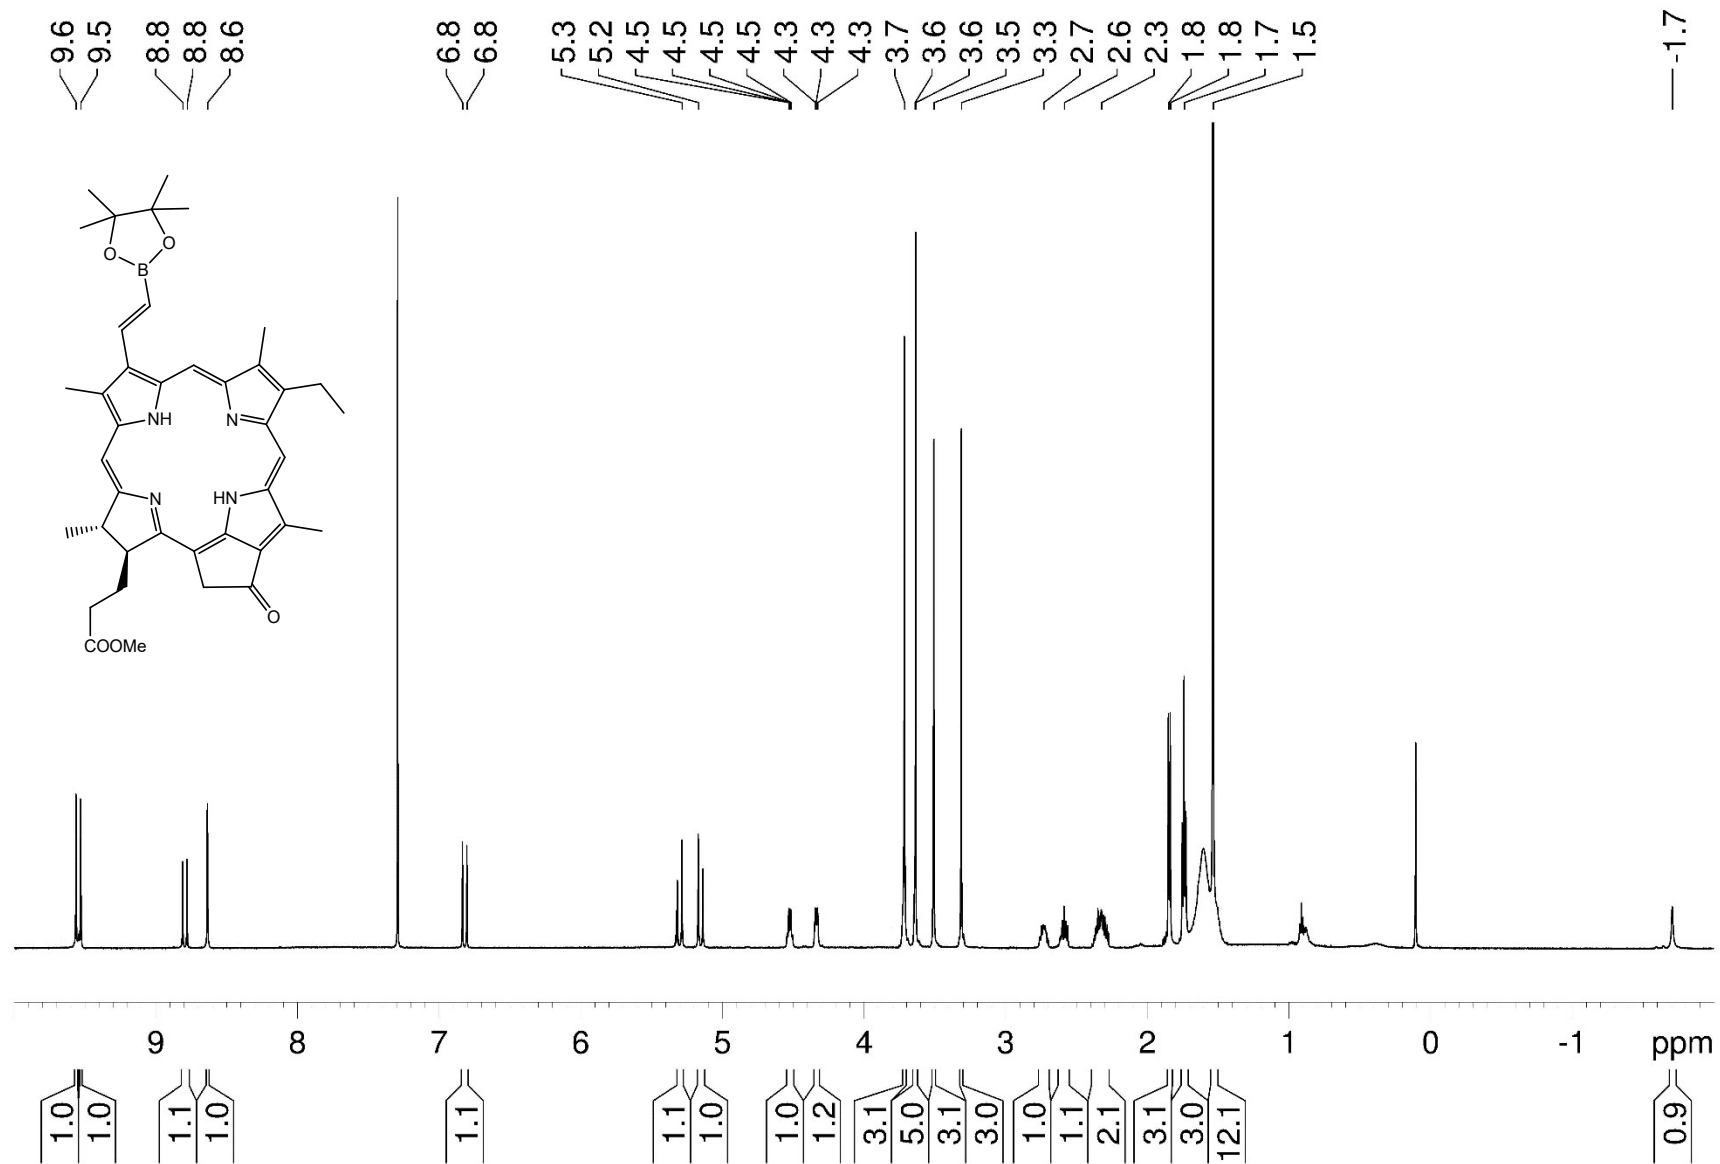

Fig. S3. <sup>1</sup>H NMR spectrum of methyl (*E*)-3<sup>2</sup>-(4,4,5,5-tetramethyl-1,3,2-dioxaborolane-2-yl)pyropheophorbide-*a* (3a) in CDCl<sub>3</sub>.



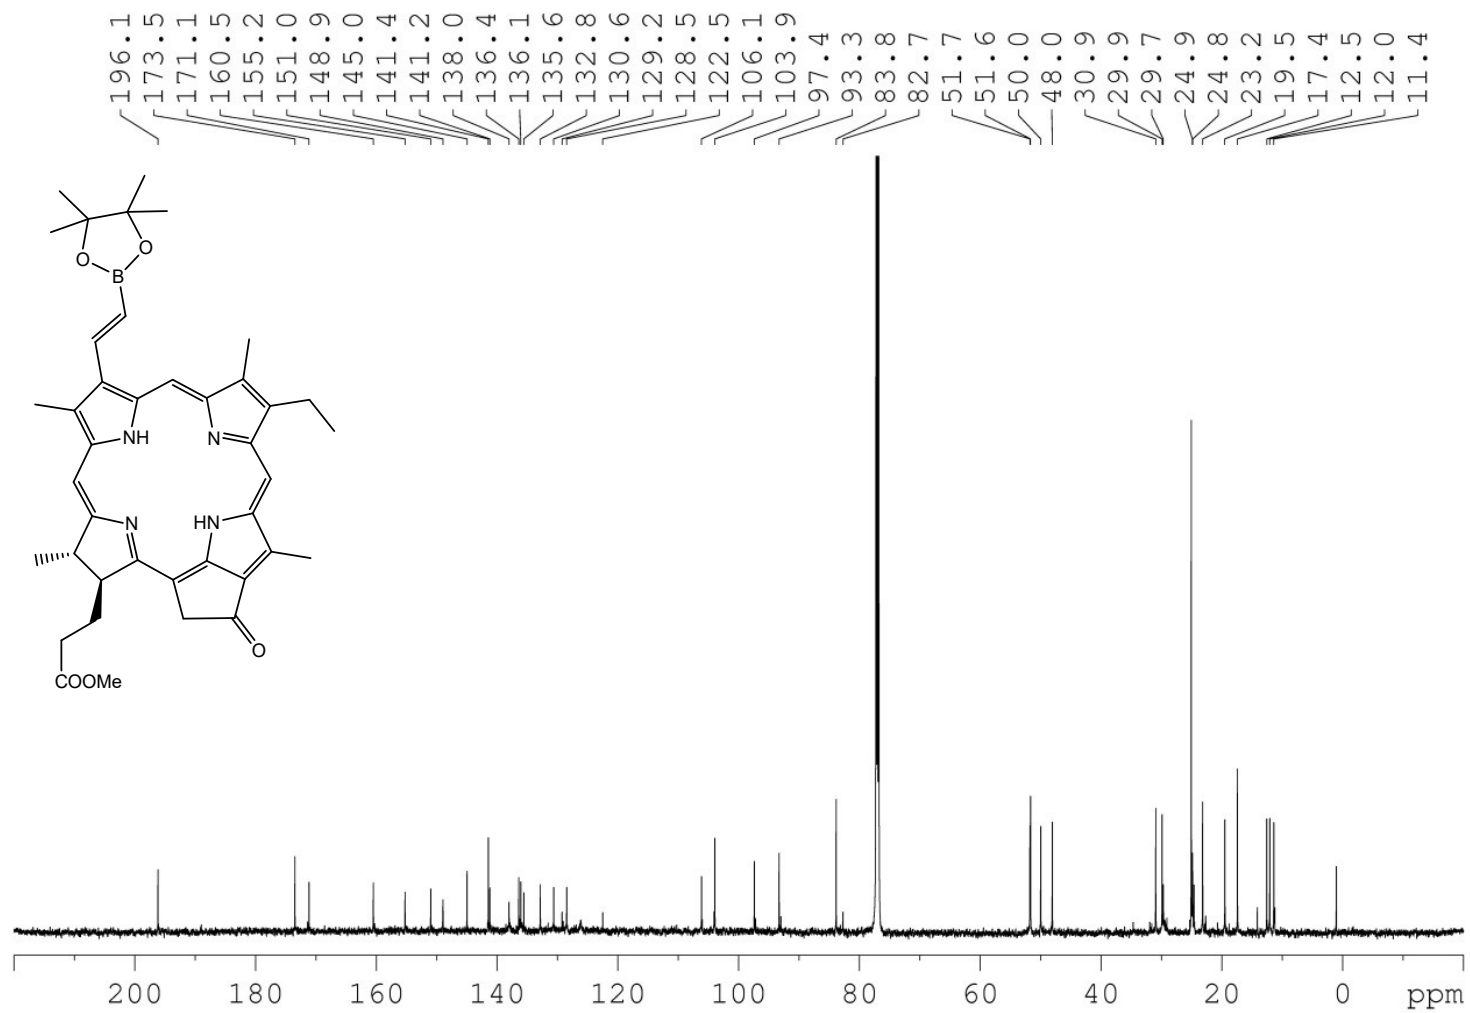

**Fig. S4.** <sup>13</sup>C NMR spectrum of methyl (*E*)-3'-(4,4,5,5-tetramethyl-1,3,2-dioxaborolane-2-yl)pyropheophorbide-*a* (**3a**) in CDCl<sub>3</sub>.

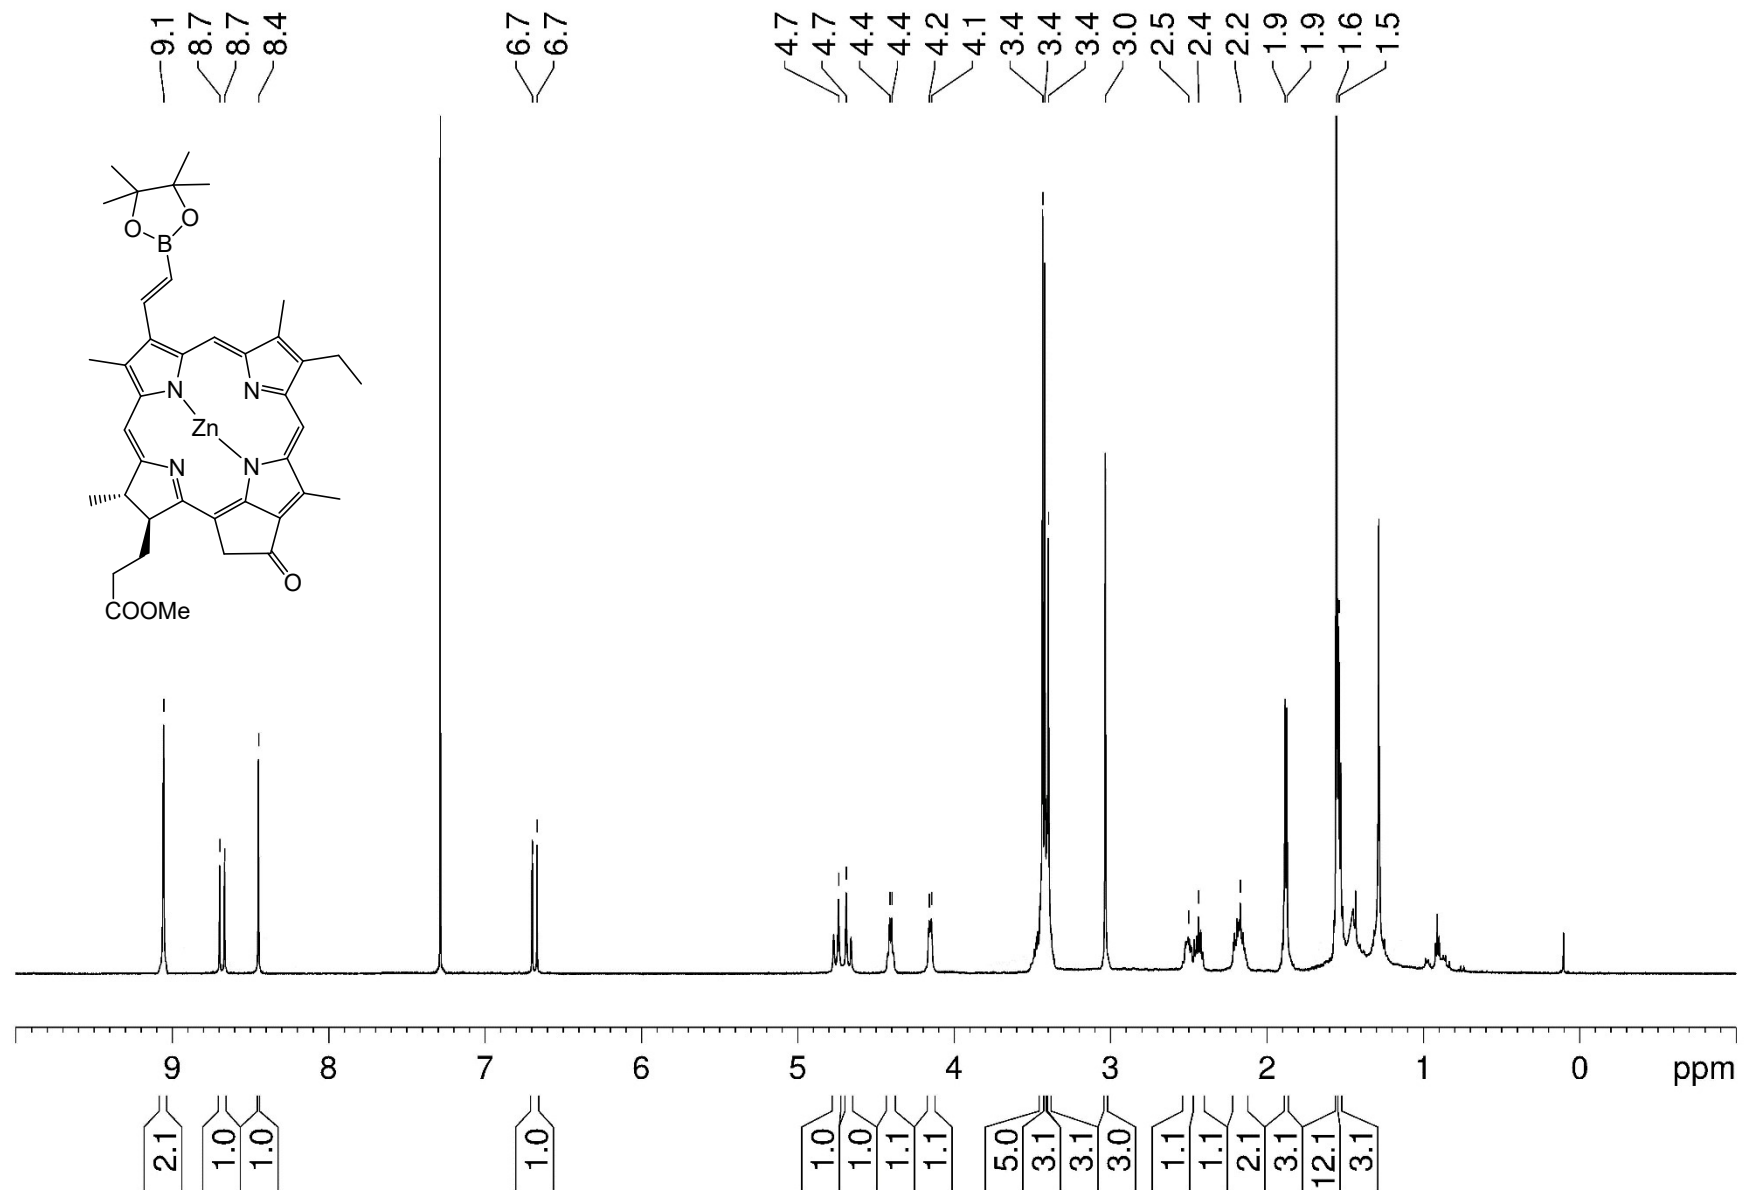

Fig. S5. <sup>1</sup>H NMR spectrum of Zn(II) methyl (*E*)-3<sup>2</sup>-(4,4,5,5-tetramethyl-1,3,2-dioxaborolane-2-yl)pyropheophorbide-*a* (**3b**) in CDCl<sub>3</sub>.

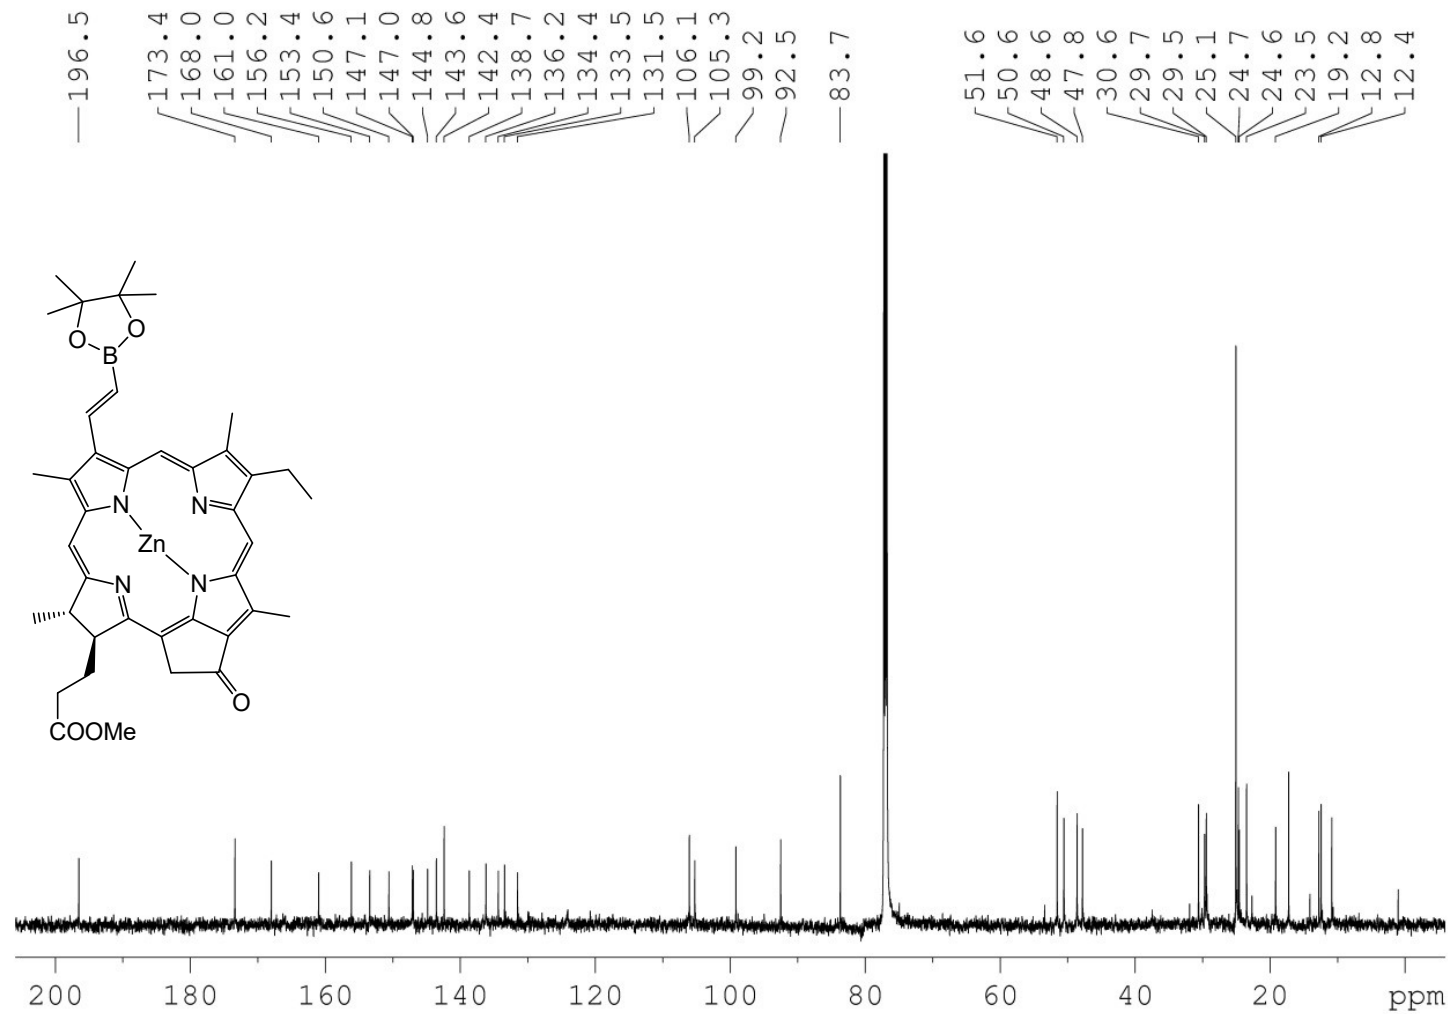

**Fig. S6.** <sup>13</sup>C NMR spectrum of Zn(II) methyl (*E*)-3<sup>2</sup>-(4,4,5,5-tetramethyl-1,3,2-dioxaborolane-2-yl)pyropheophorbide-*a* (**3b**) in CDCl<sub>3</sub>.

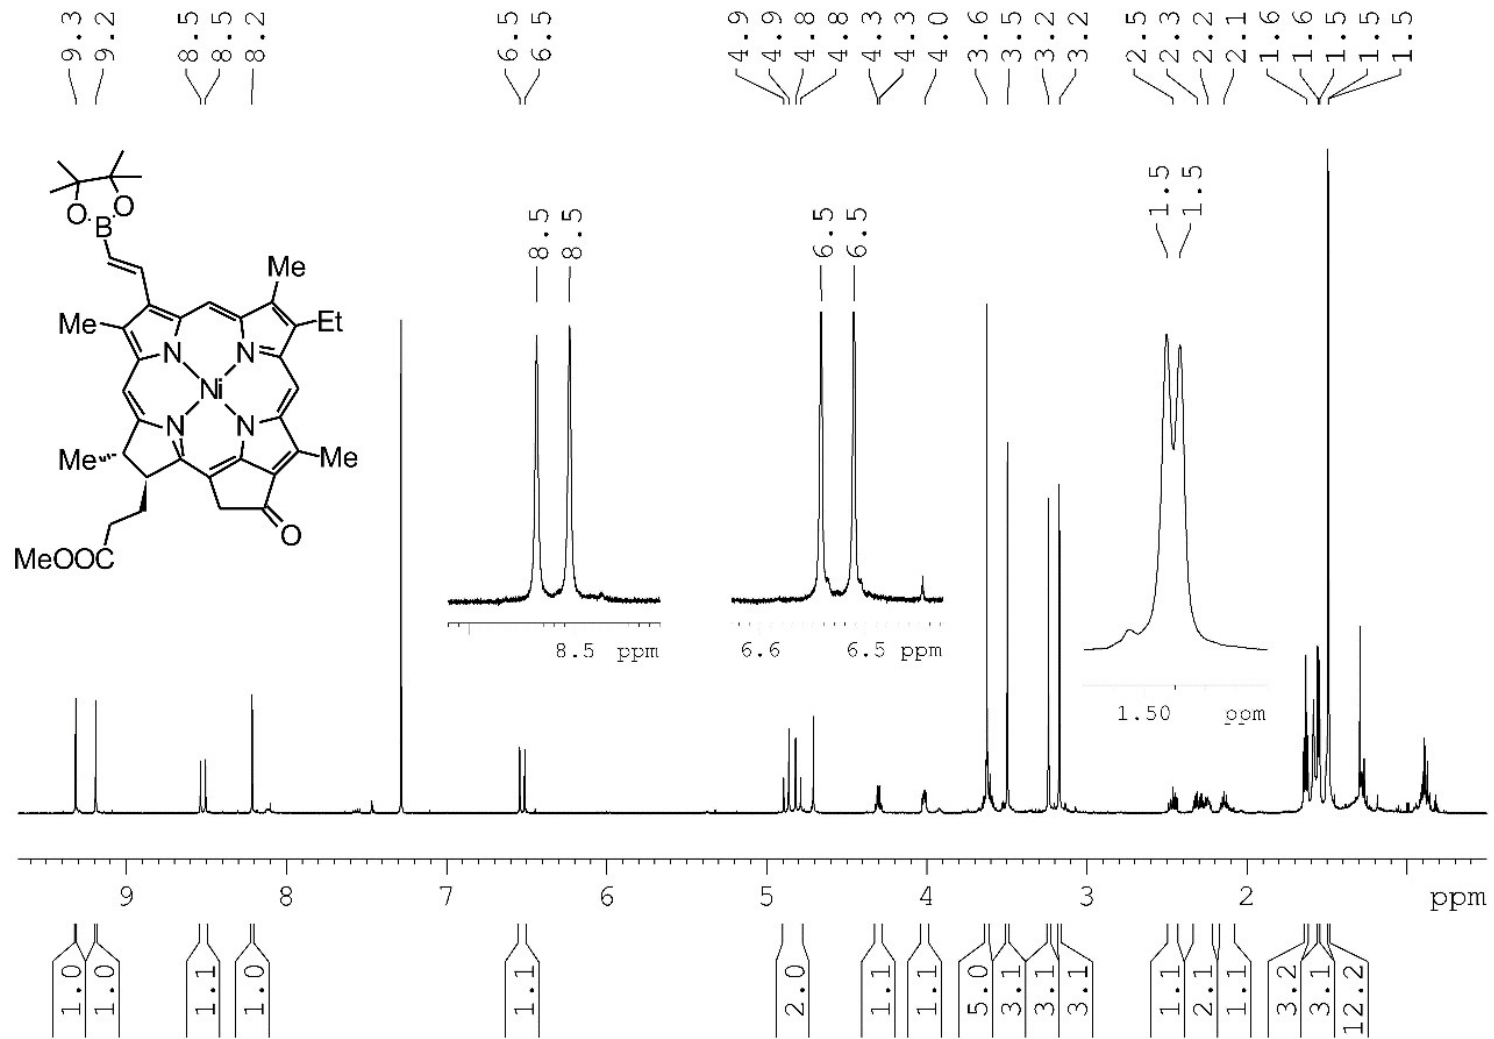

**Fig. S7.** <sup>1</sup>H NMR spectrum of Ni(II) methyl (*E*)-3<sup>2</sup>-(4,4,5,5-tetramethyl-1,3,2-dioxaborolane-2-yl)pyropheophorbide-*a* (**3c**) in CDCl<sub>3</sub>.

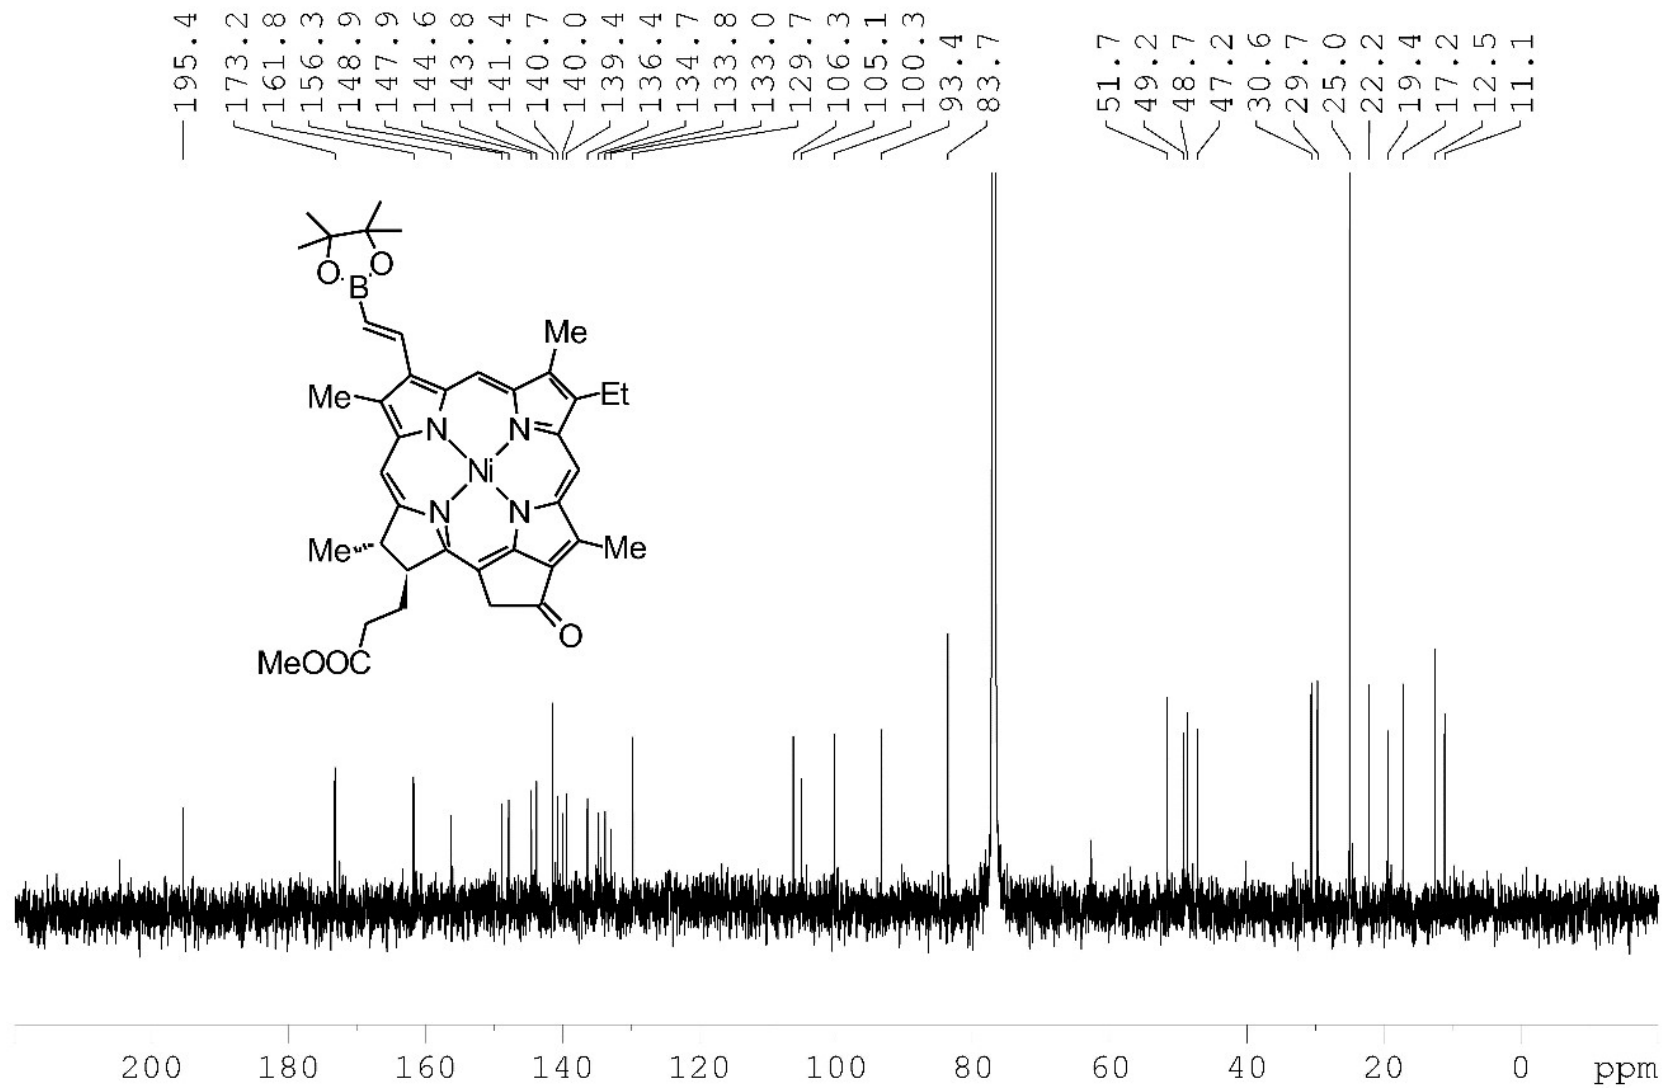

**Fig. S8.** <sup>13</sup>C NMR spectrum of Ni(II) methyl (*E*)-3'-(4,4,5,5-tetramethyl-1,3,2-dioxaborolane-2-yl)pyropheophorbide-*a* (3c) in CDCl<sub>3</sub>.

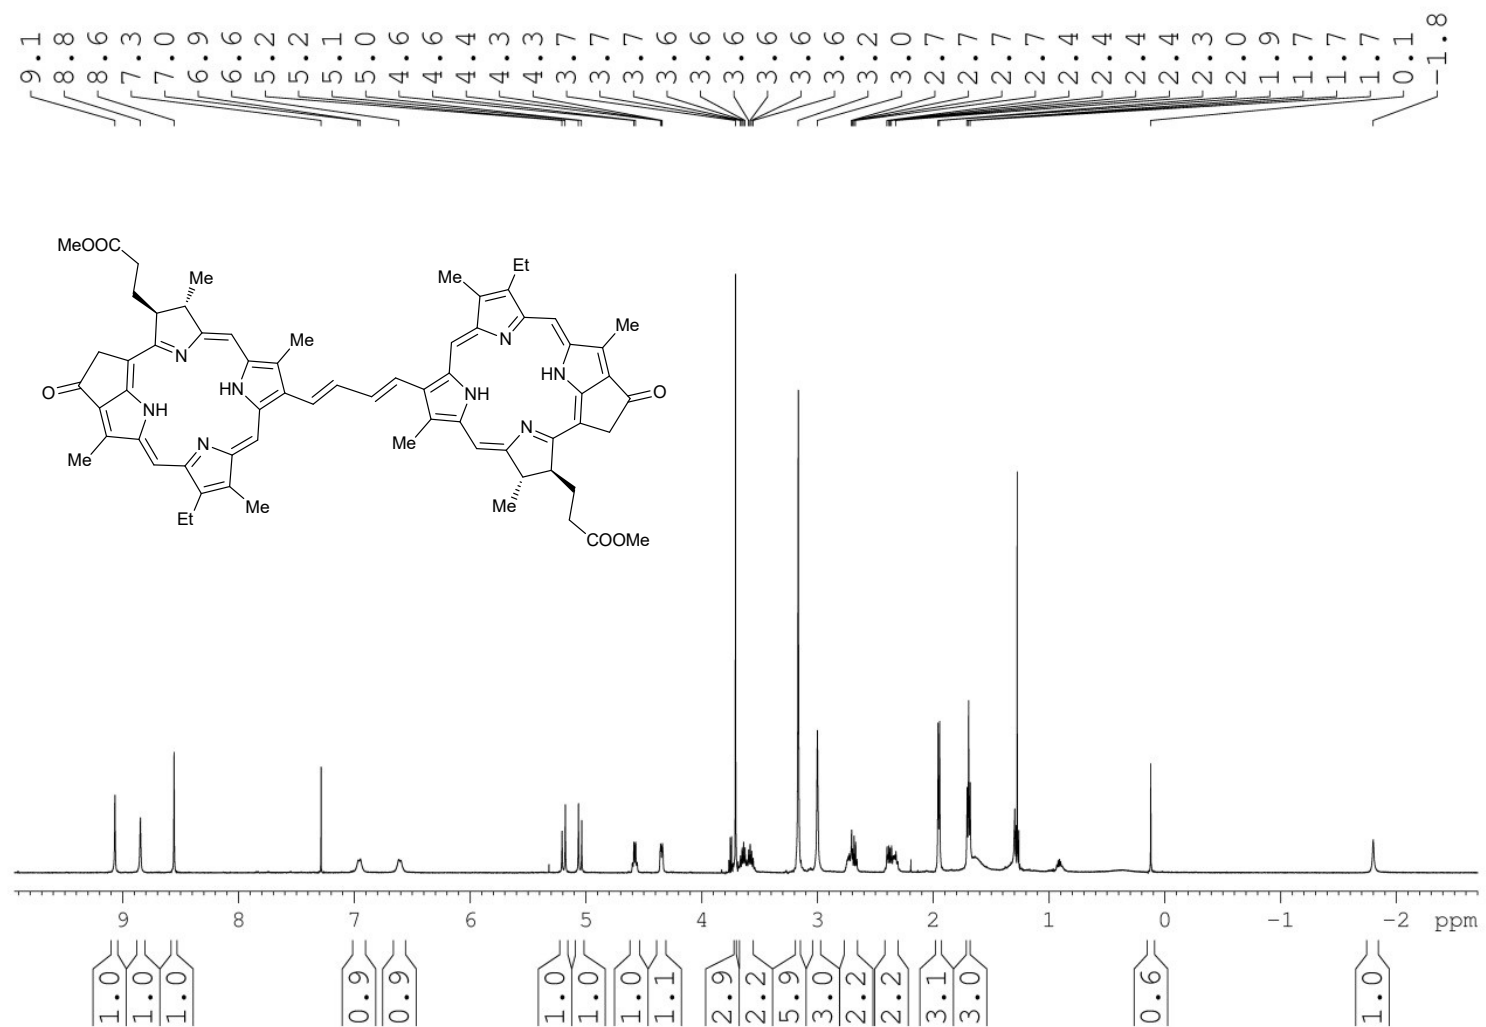

**Fig. S9.** <sup>1</sup>H NMR spectrum of methyl pyropheophorbide-*a* dimer (4) in CDCl<sub>3</sub>.

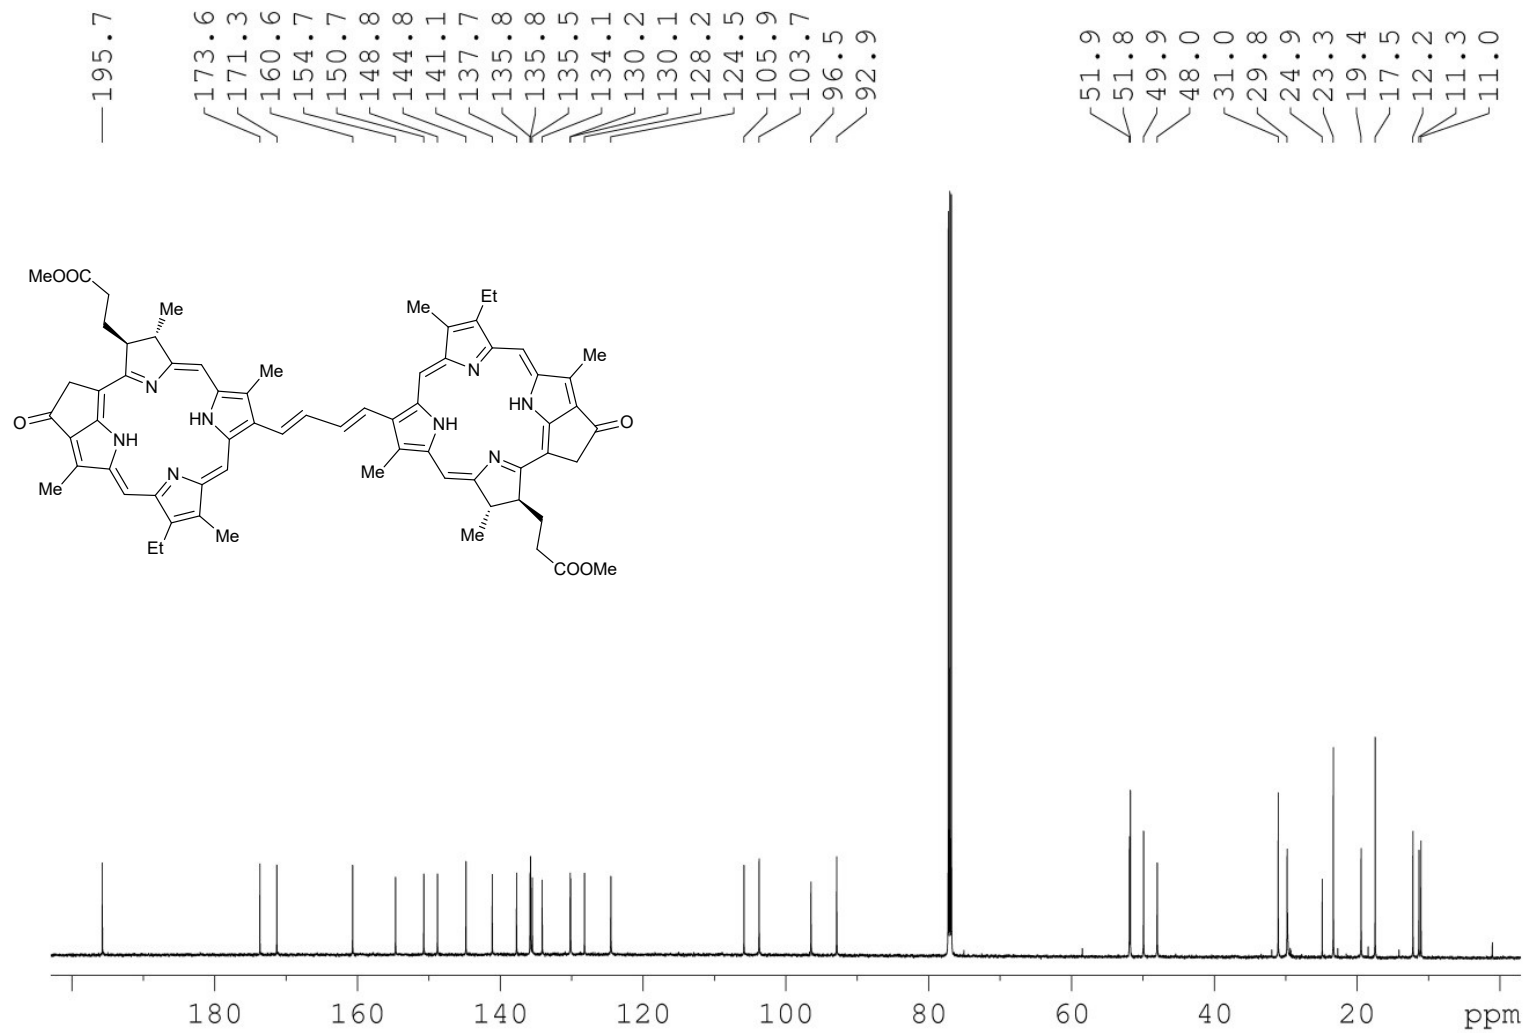

**Fig. S10.** <sup>13</sup>C NMR spectrum of methyl pyropheophorbide-*a* dimer (**4**) in CDCl<sub>3</sub>.

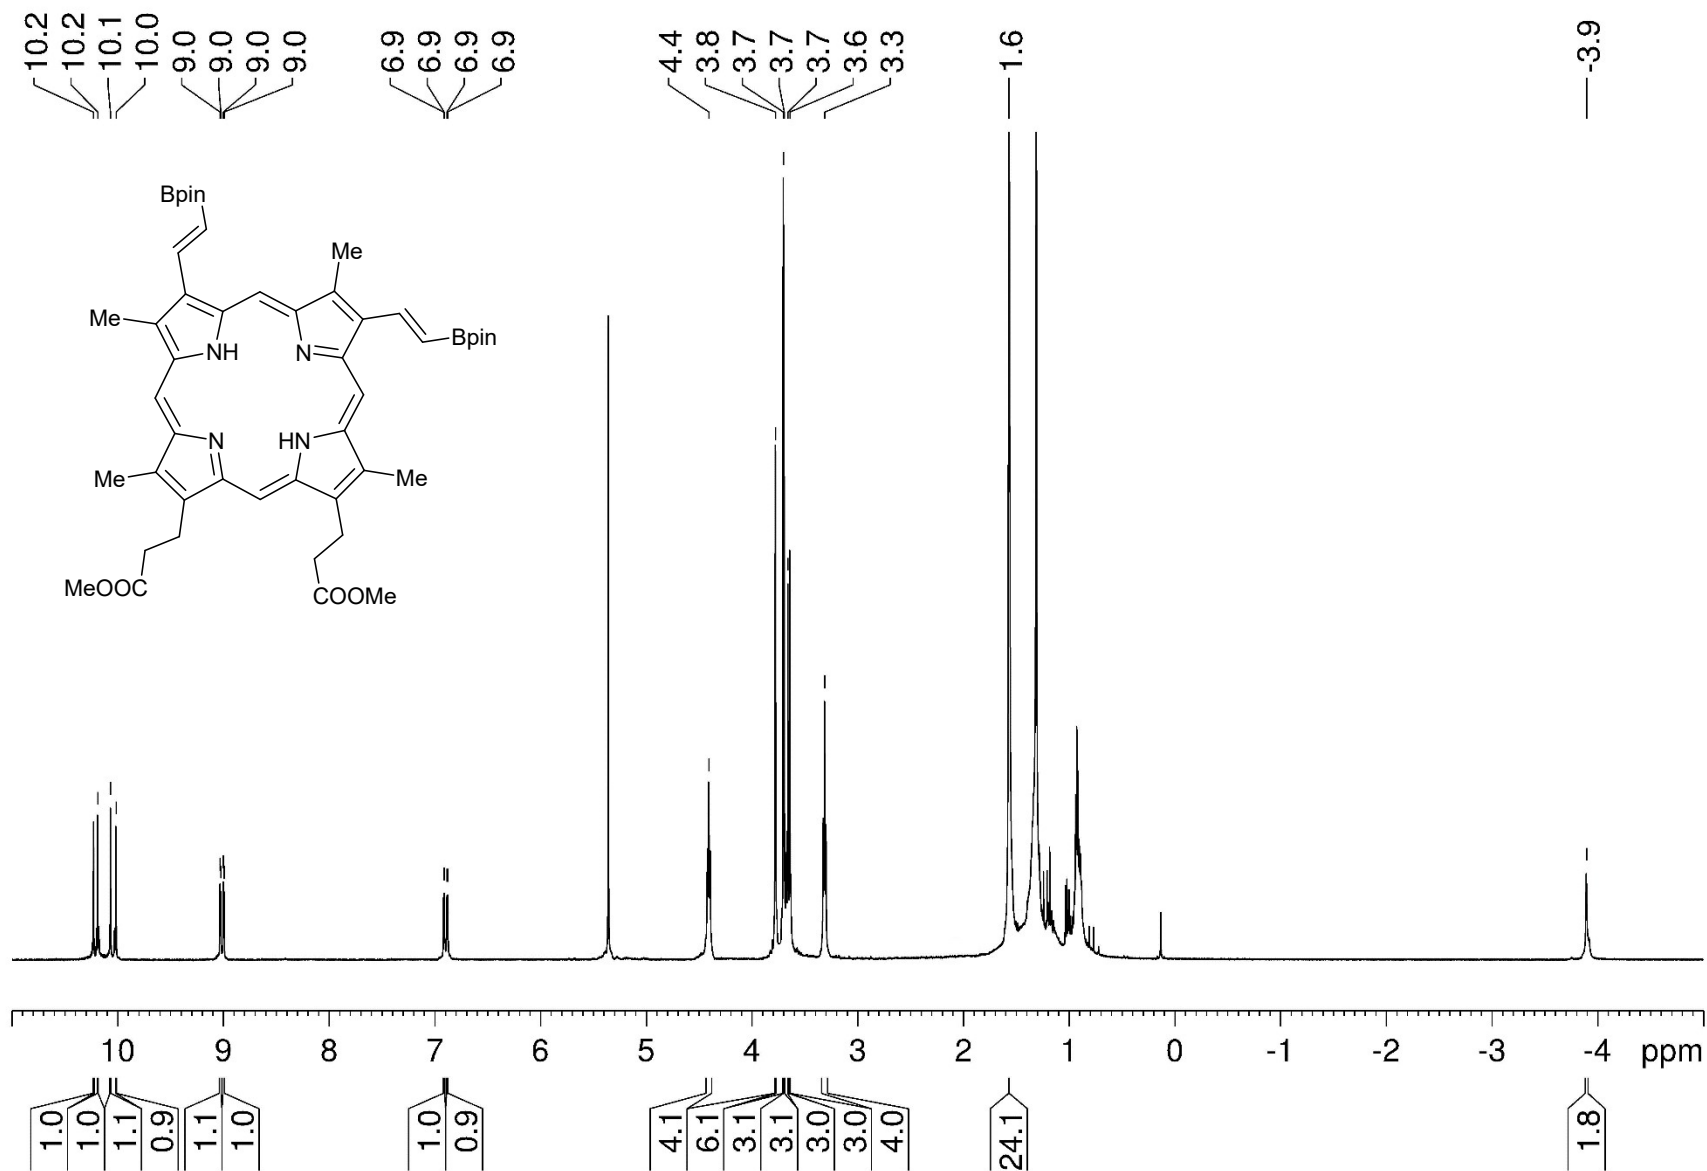

**Fig. S11.** <sup>1</sup>H NMR spectrum of dimethyl (*E,E*)-3<sup>2</sup>,8<sup>2</sup>-bis(4,4,5,5-tetramethyl-1,3,2-dioxaborolane-2-yl)protoporphyrin IX (**7a**) in CDCl<sub>3</sub>.



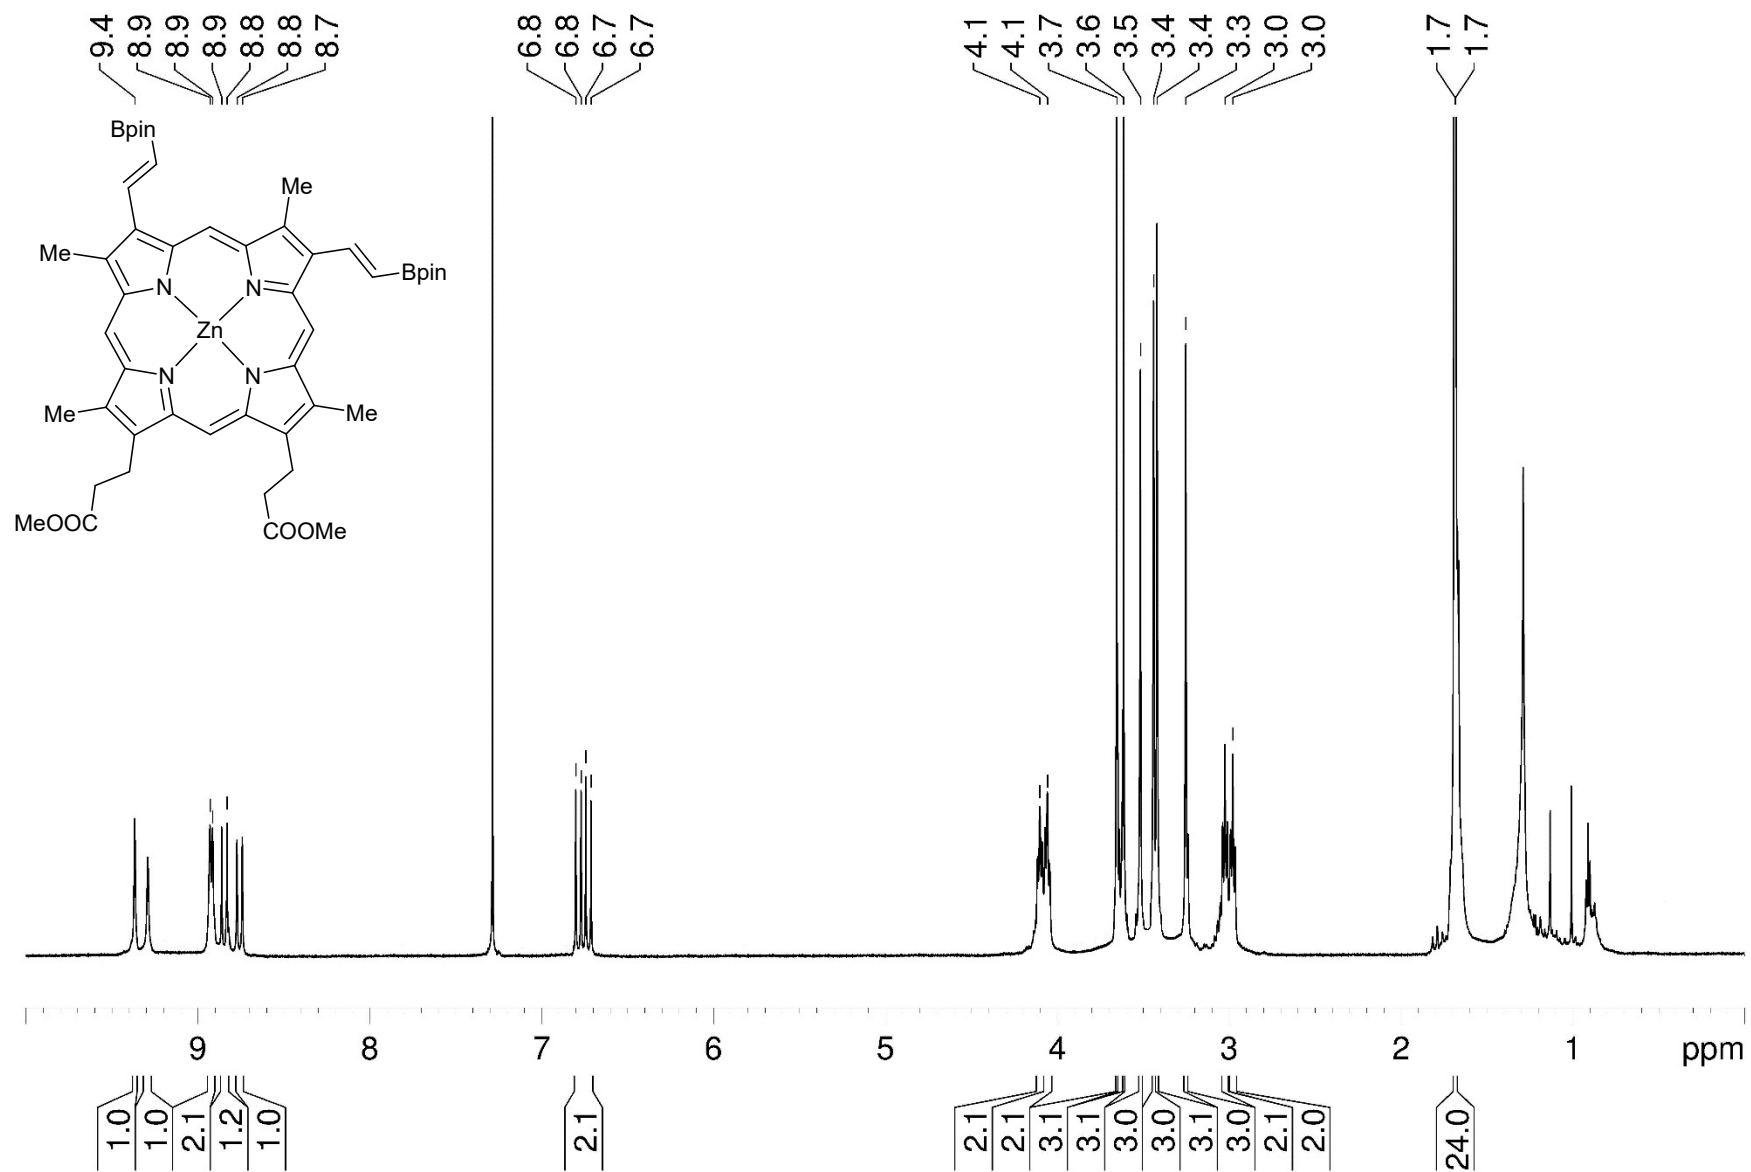

**Fig. S12.** <sup>1</sup>H NMR spectrum of Ni(II) dimethyl (*E,E*)-3<sup>2</sup>,8<sup>2</sup>-bis(4,4,5,5-tetramethyl-1,3,2-dioxaborolane-2-yl)protoporphyrin IX (**7b**) in CDCl<sub>3</sub>.

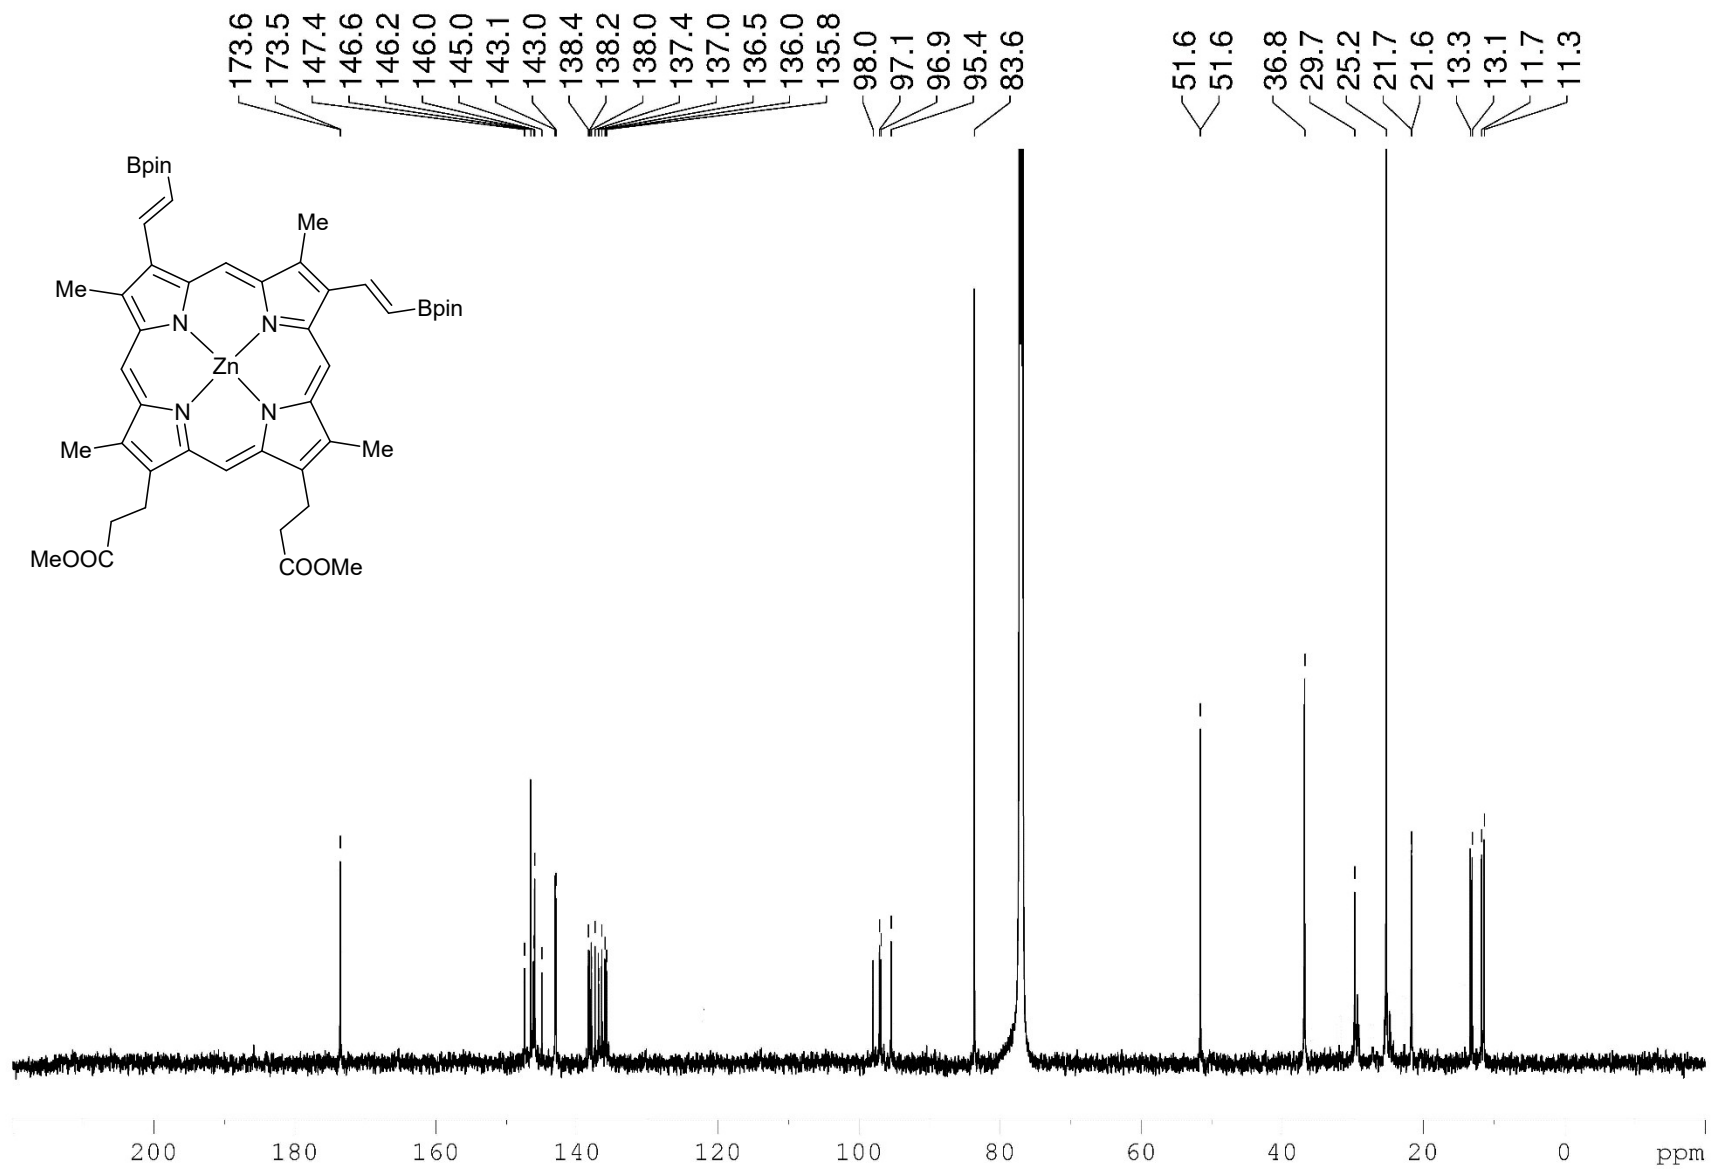

**Fig. S13.** <sup>13</sup>C NMR spectrum of Ni(II) dimethyl (*E,E*)-3<sup>2</sup>,8<sup>2</sup>-bis(4,4,5,5-tetramethyl-1,3,2-dioxaborolane-2-yl)protoporphyrin IX (**7b**) in CDCl<sub>3</sub>.

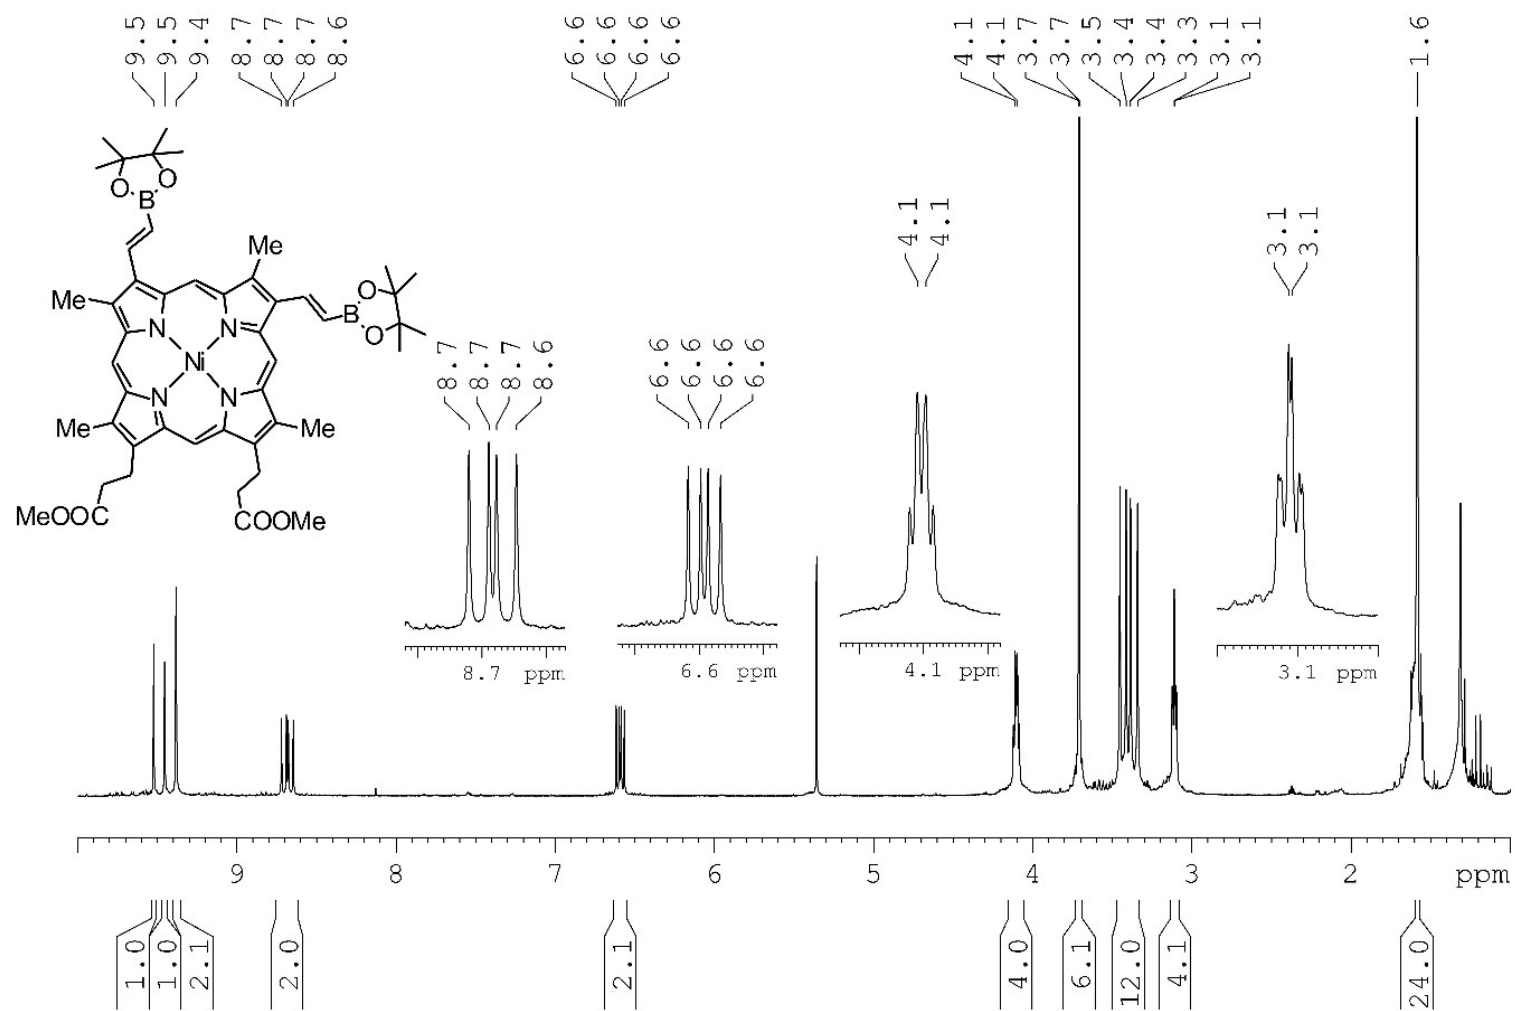

**Fig. S14.** <sup>1</sup>H NMR spectrum of Ni(II) dimethyl (*E,E*)-3,8-bis(4,4,5,5-tetramethyl-1,3,2-dioxaborolane-2-yl)protoporphyrin IX (**7c**) in CDCl<sub>3</sub>.

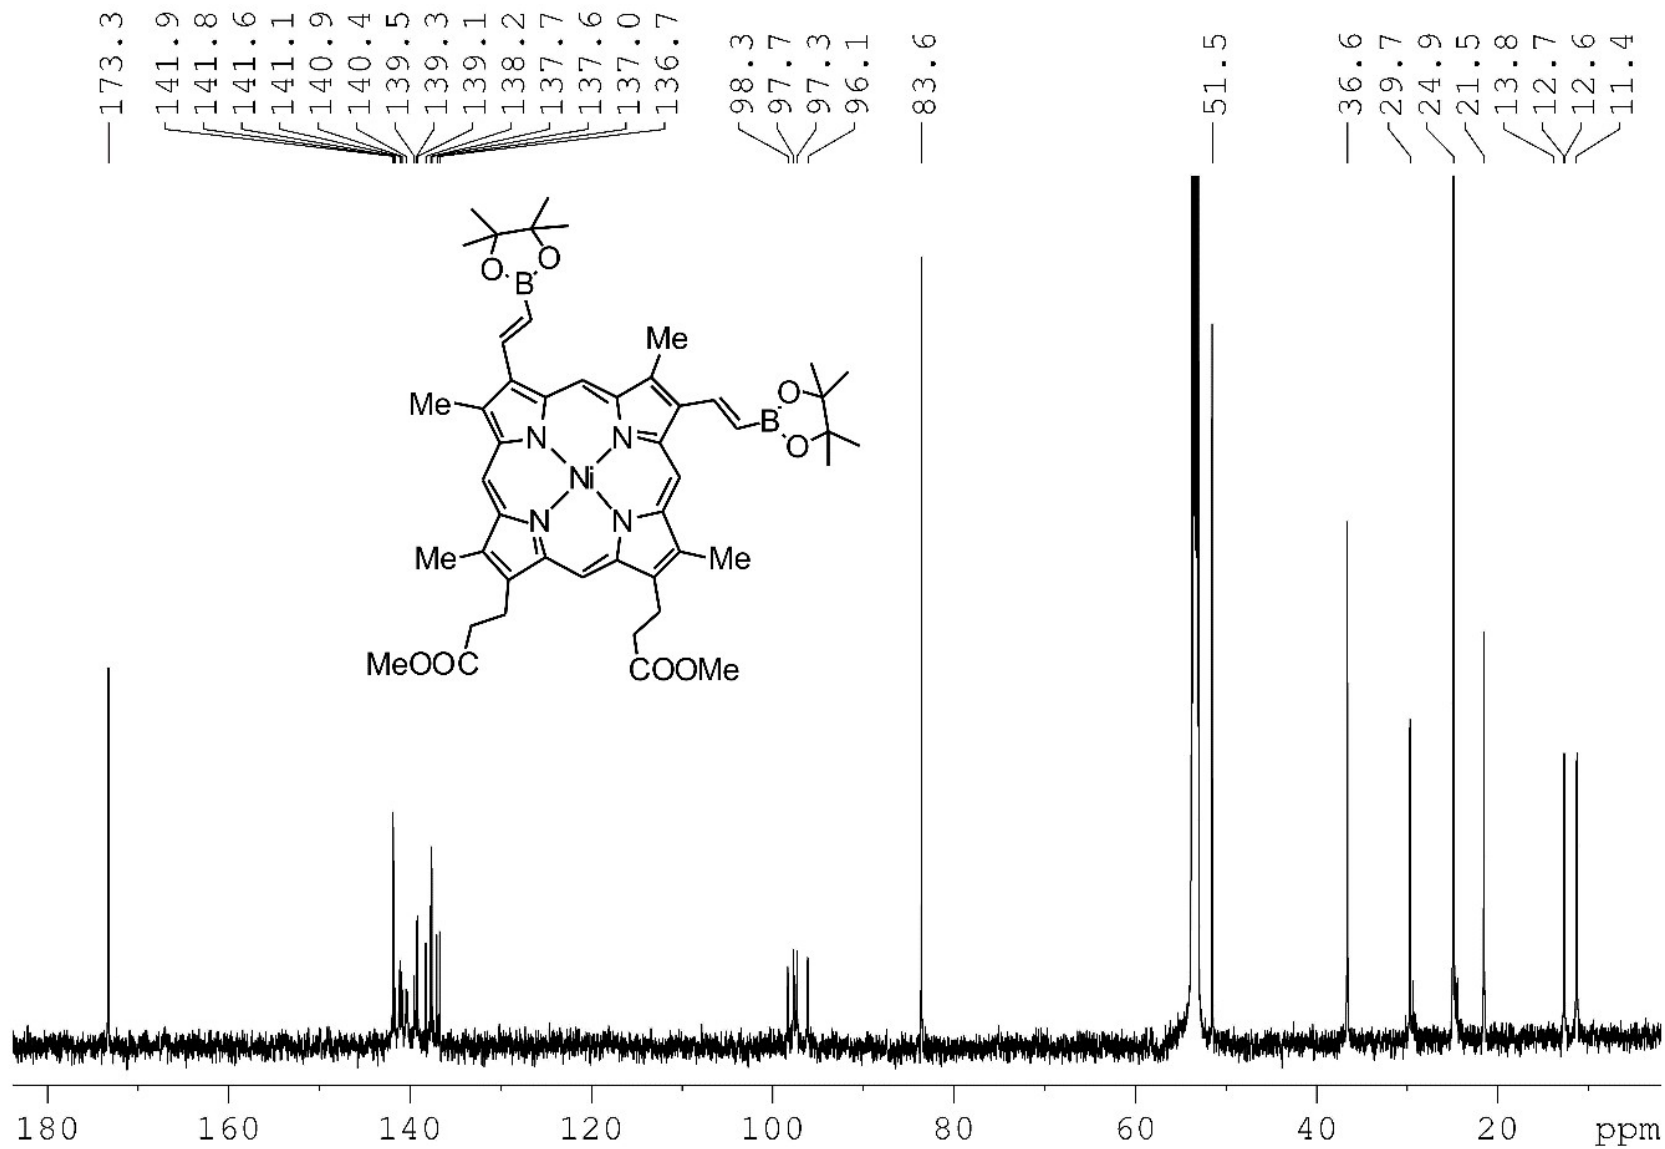

**Fig. S15.** <sup>13</sup>C NMR spectrum of Ni(II) dimethyl (*E,E*)-3<sup>2</sup>,8<sup>2</sup>-bis(4,4,5,5-tetramethyl-1,3,2-dioxaborolane-2-yl)protoporphyrin IX (7c) in CDCl<sub>3</sub>.

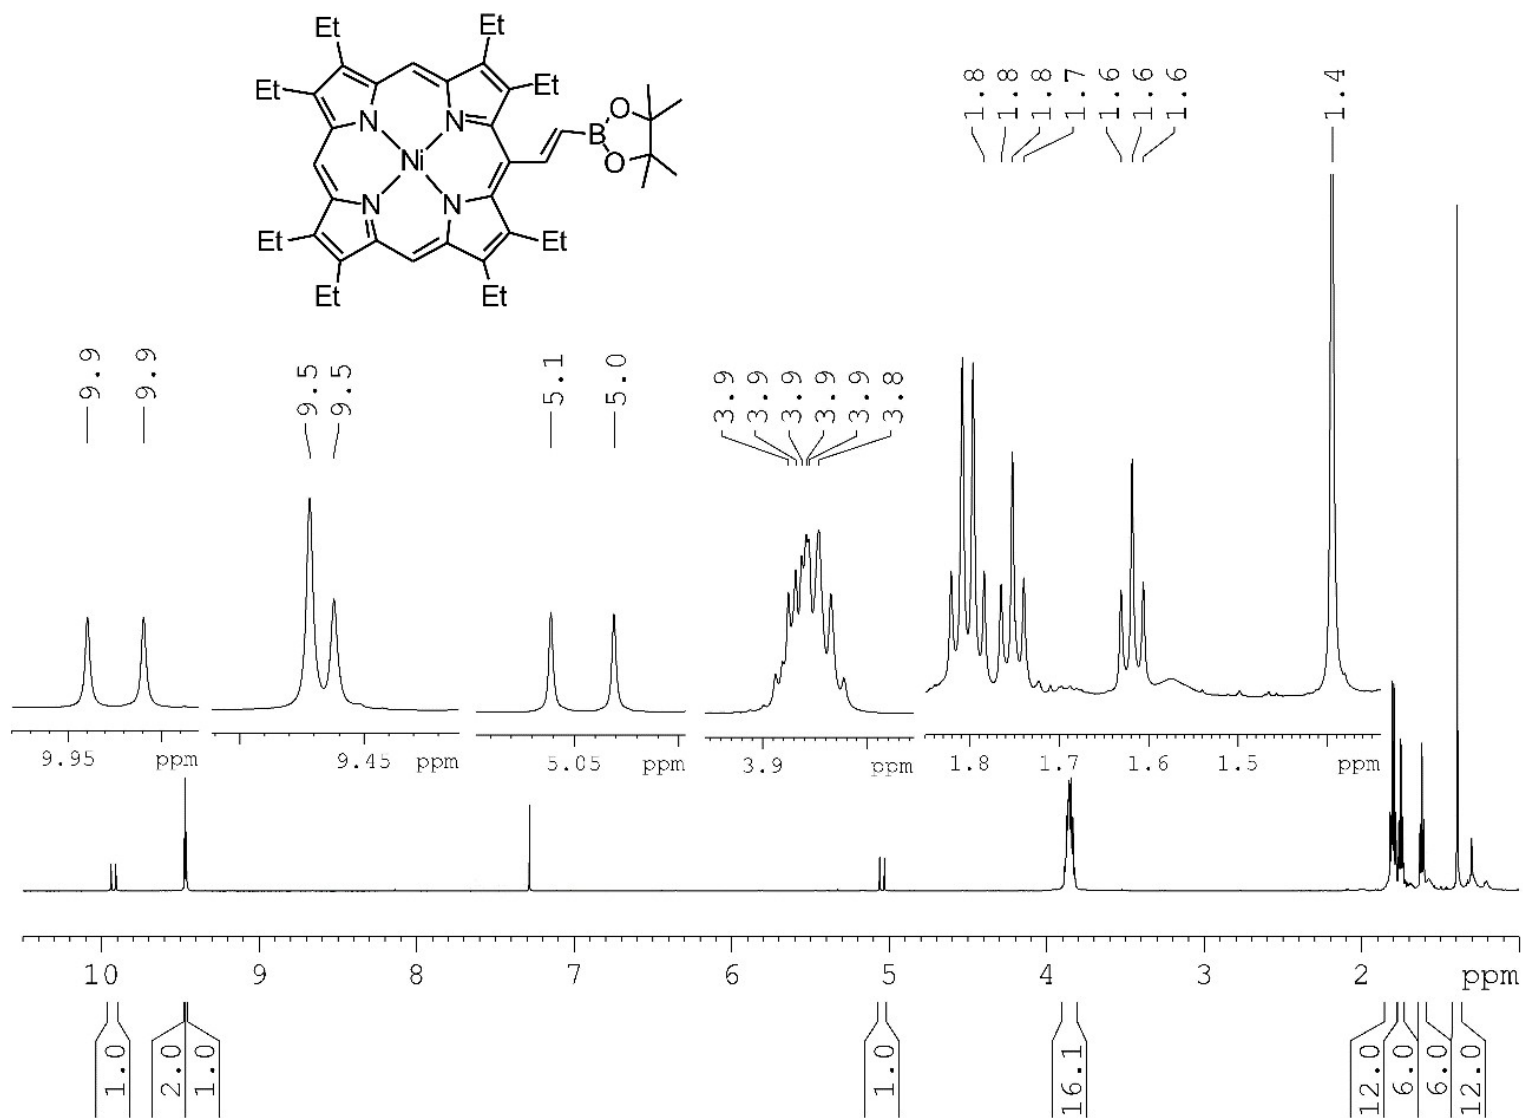

**Fig. S16.** <sup>1</sup>H NMR spectrum of Ni (II) (*E*)-5-(2-(4,4,5,5-tetramethyl-1,3,2-dioxaborolane-2-yl)vinyl)-2,3,7,8,12,13,17,18-octaethylporphyrin (**9**) in CDCl<sub>3</sub>.

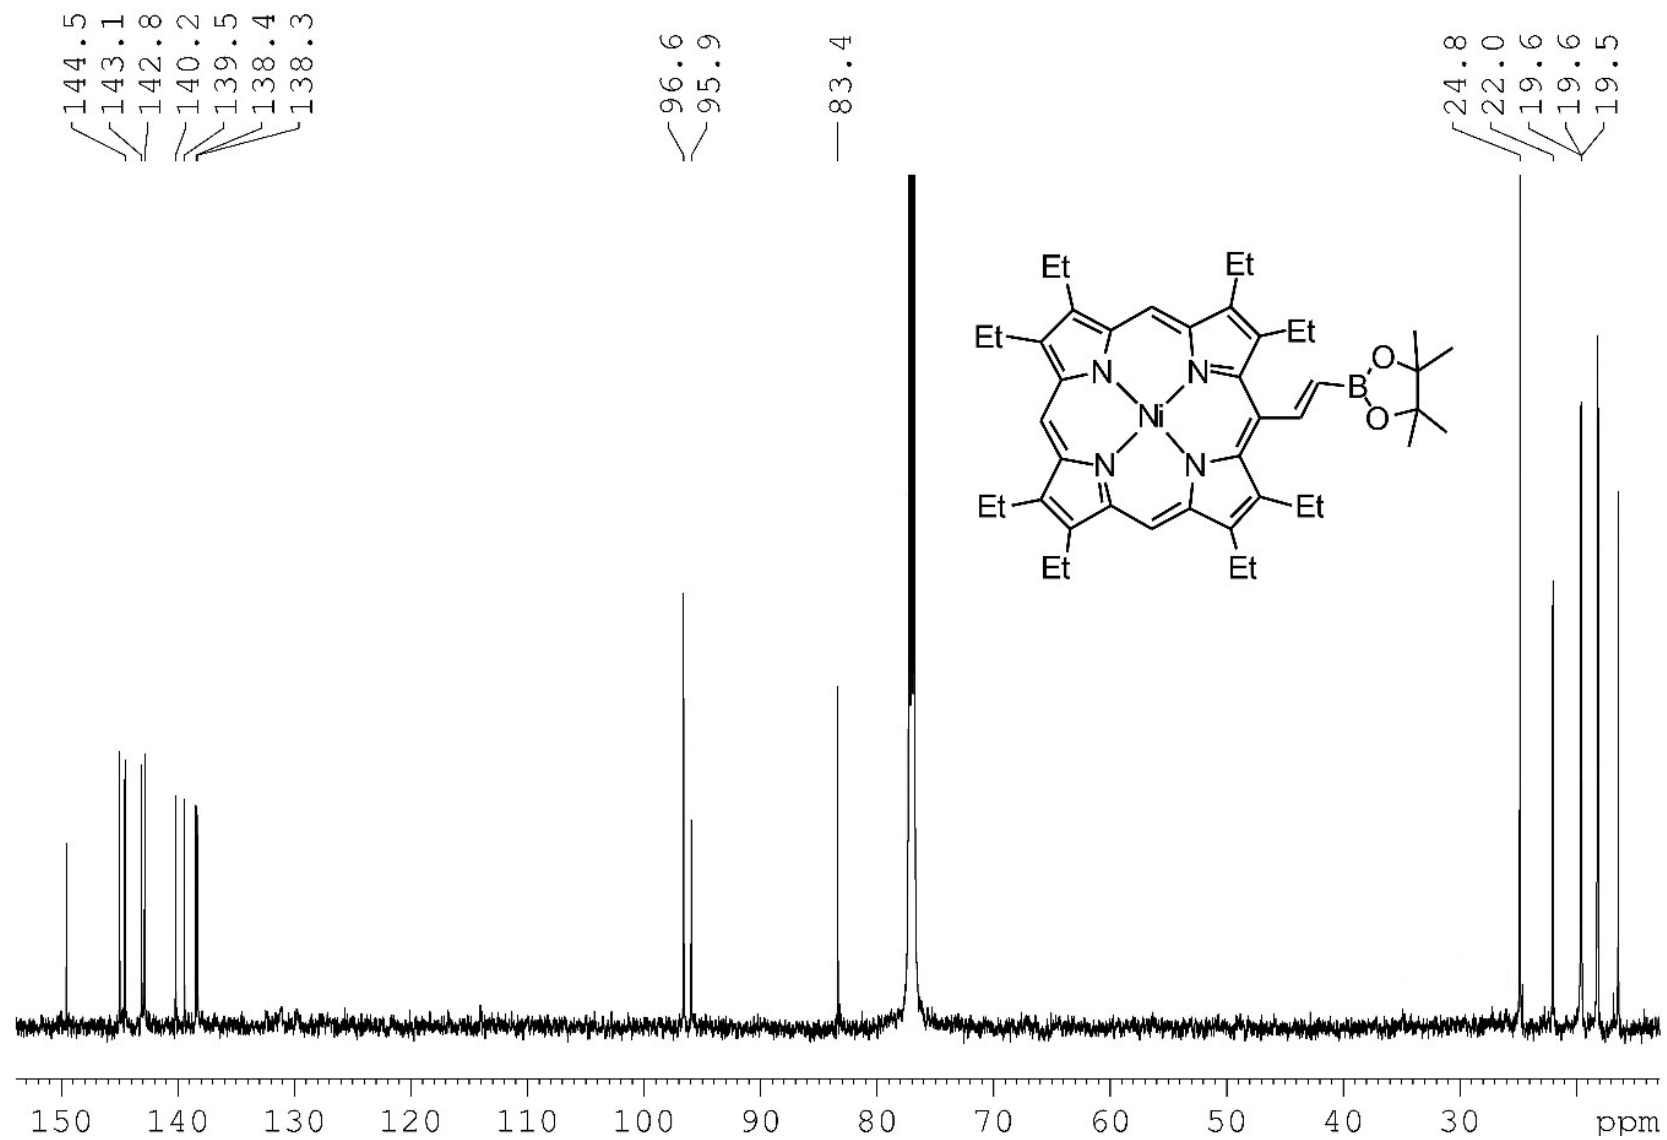

**Fig. S17.** <sup>13</sup>C NMR spectrum of Ni (II) (*E*) 5-(2-(4,4,5,5-tetramethyl-1,3,2-dioxaborolane-2-yl)vinyl)-2,3,7,8,12,13,17,18-octaethylporphyrin (9) in CDCl<sub>3</sub>.

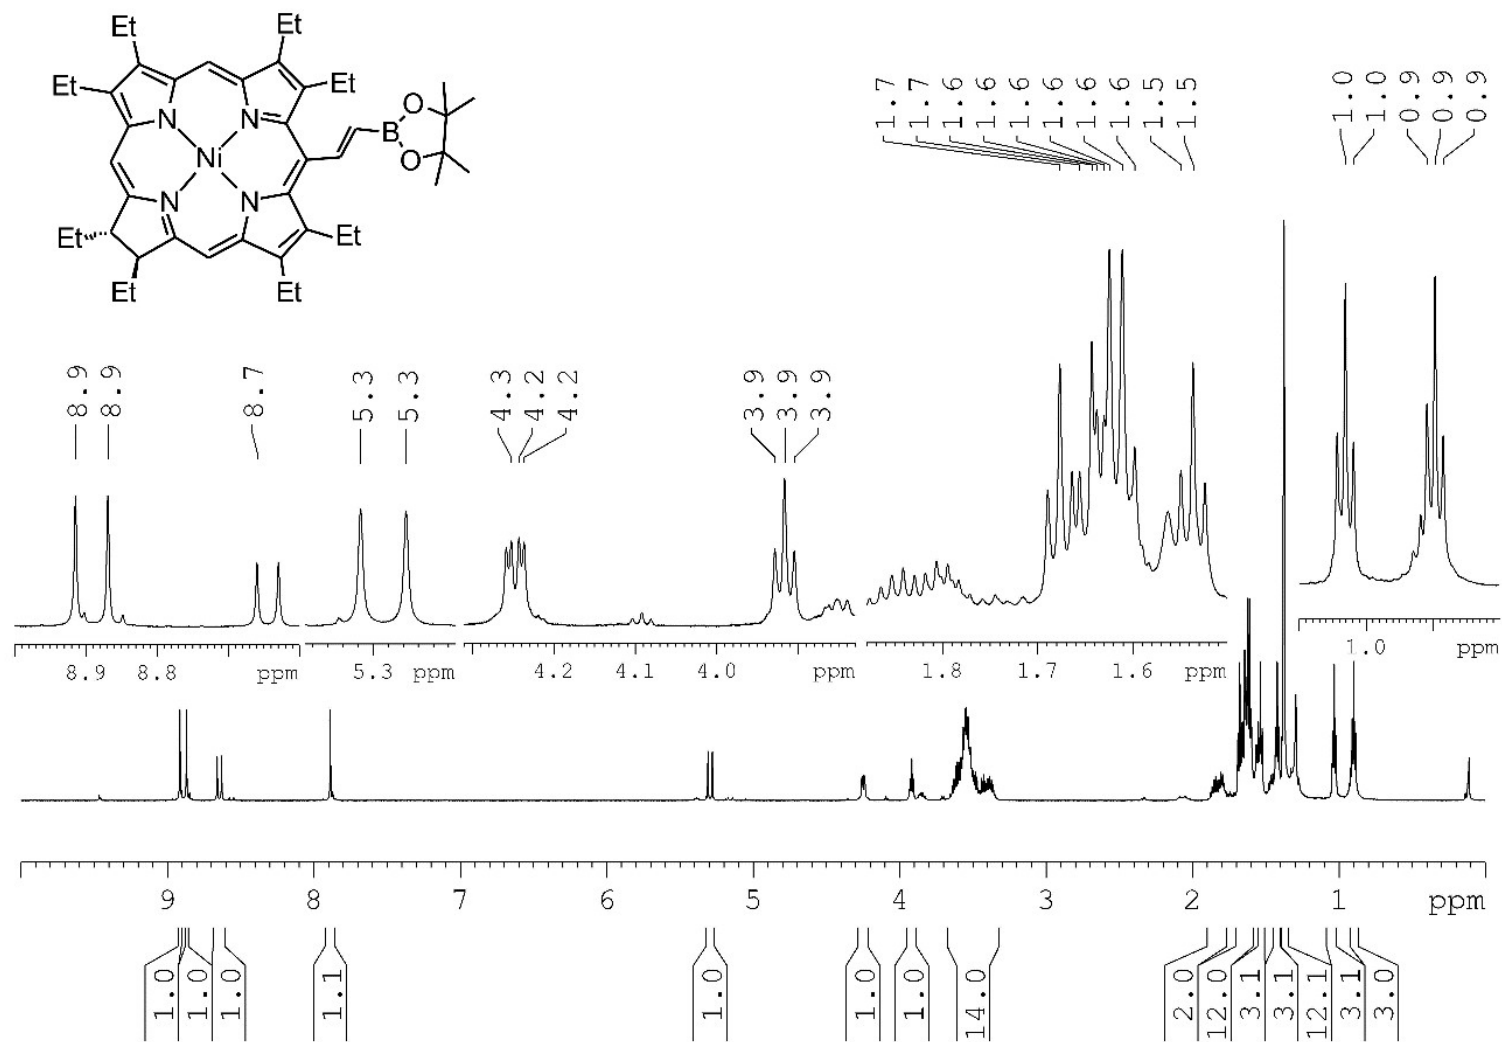

**Fig. S18.** <sup>1</sup>H NMR spectrum of Ni (II) (*E*) 5-(2-(4,4,5,5-tetramethyl-1,3,2-dioxaborolane-2-yl)vinyl)-2,3,7,8,12,13,17,18-octaethyl-17,18-*trans*-dihydroporphyrin (**11**) in CDCl<sub>3</sub>.

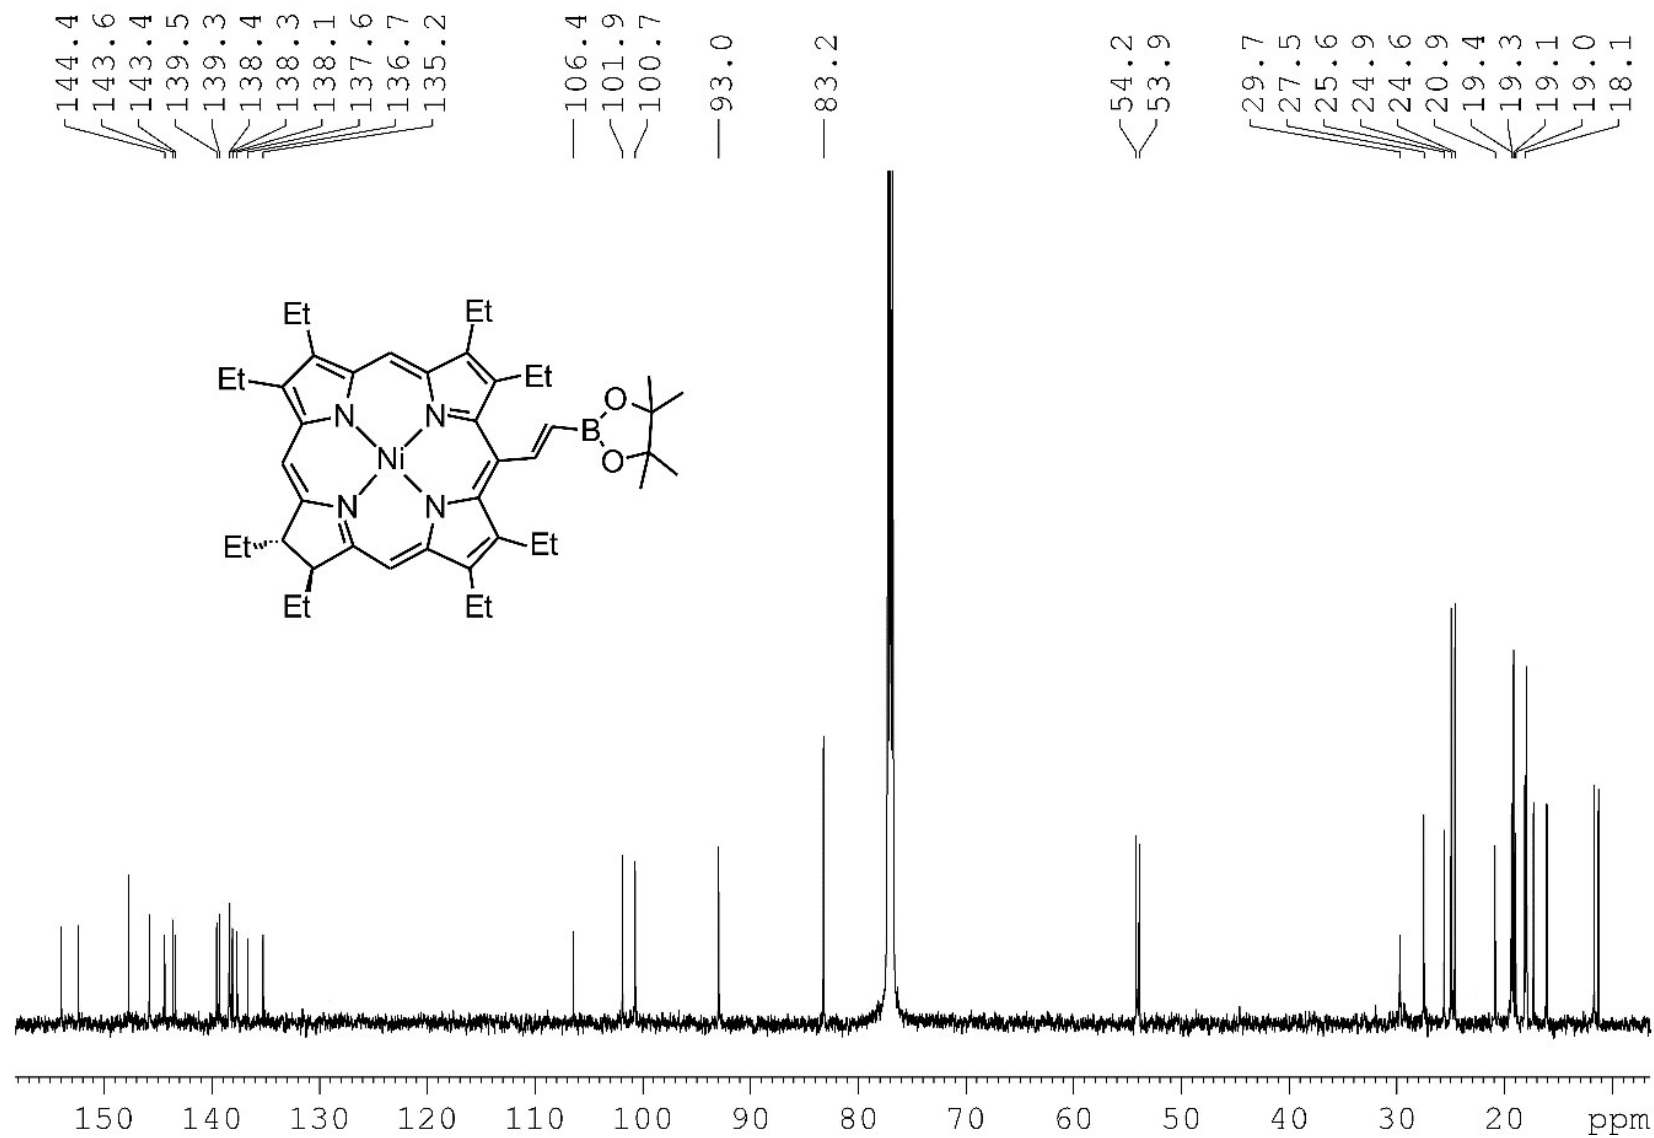

**Fig. S19.** <sup>13</sup>C NMR spectrum of Ni(II) (*E*)-5-(2-(4,4,5,5-tetramethyl-1,3,2-dioxaborolane-2-yl)vinyl)-2,3,7,8,12,13,17,18-octaethyl-17,18-*trans*-dihydroporphyrin (**11**) in CDCl<sub>3</sub>.



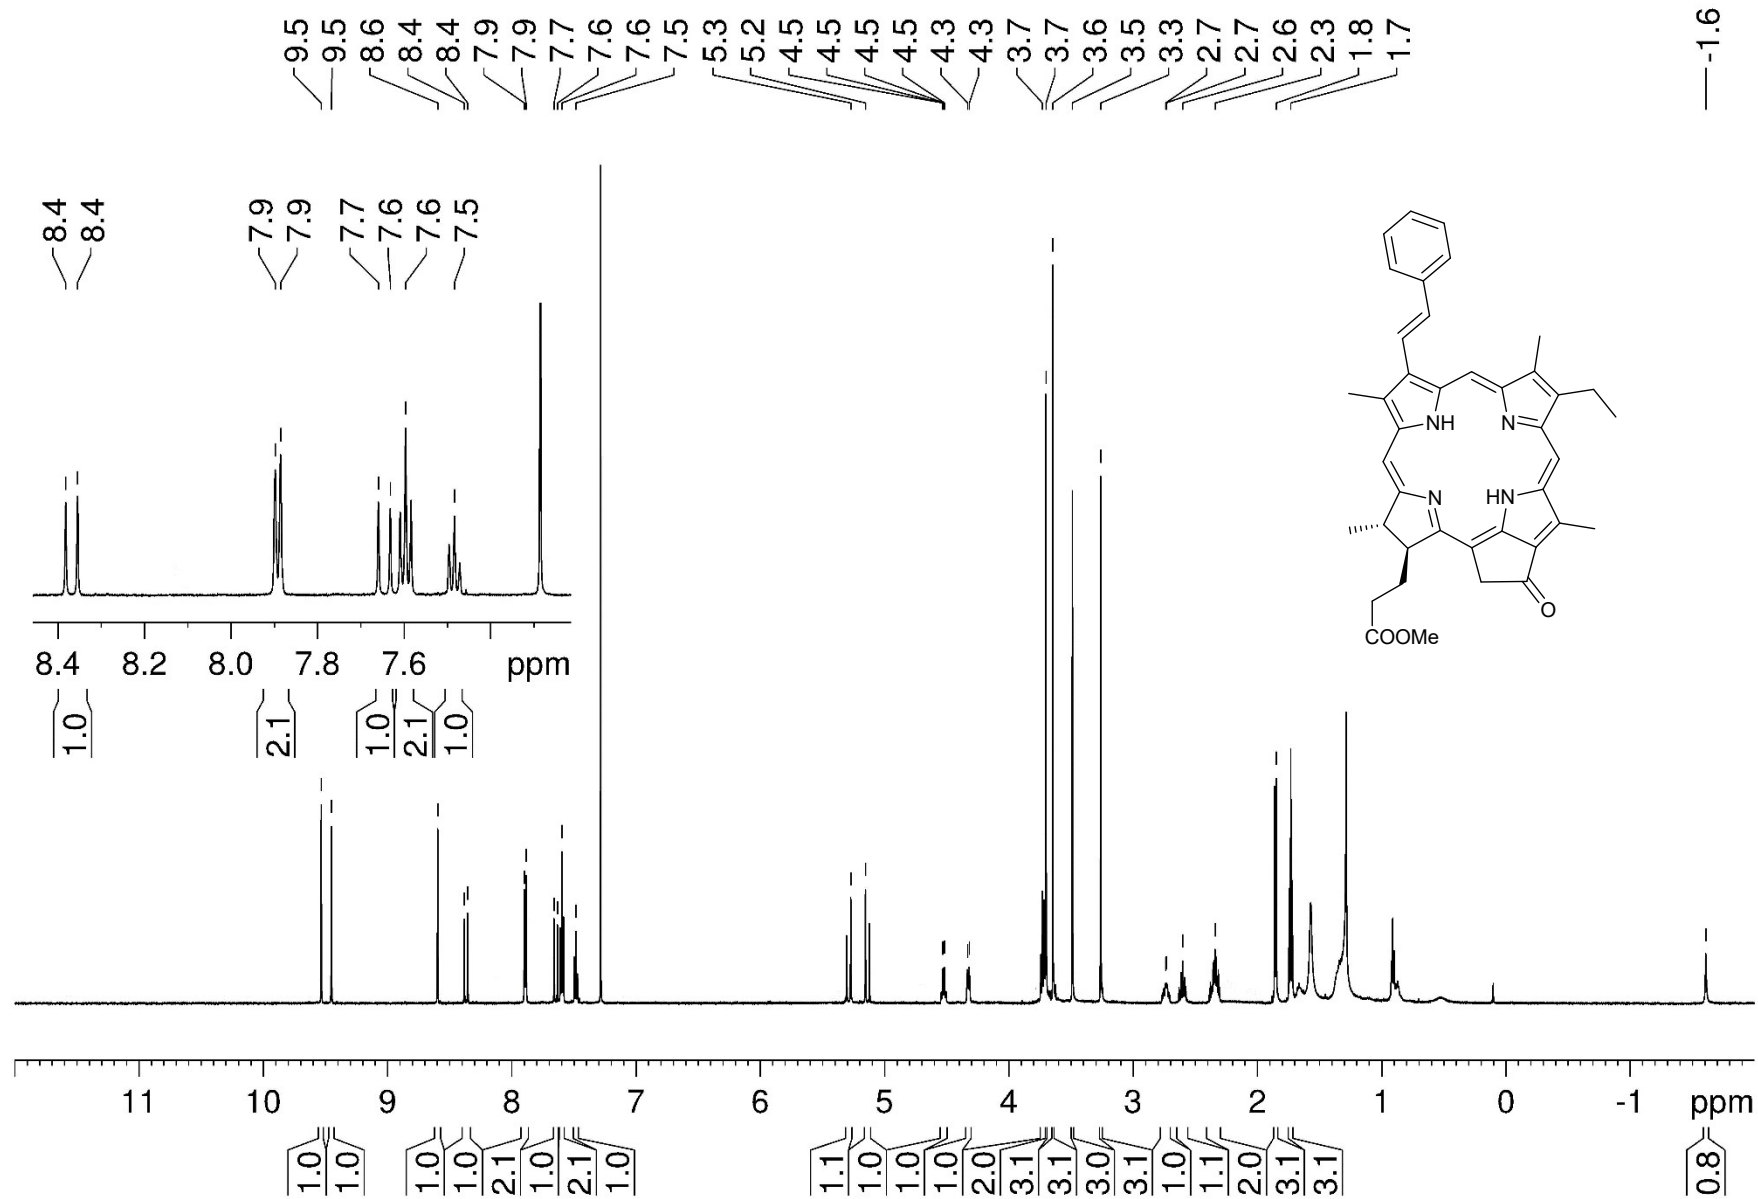

Fig. S20. <sup>1</sup>H NMR spectrum of methyl (*E*)-3<sup>2</sup>-phenylpyropheophorbide-*a* (12a) in CDCl<sub>3</sub>.

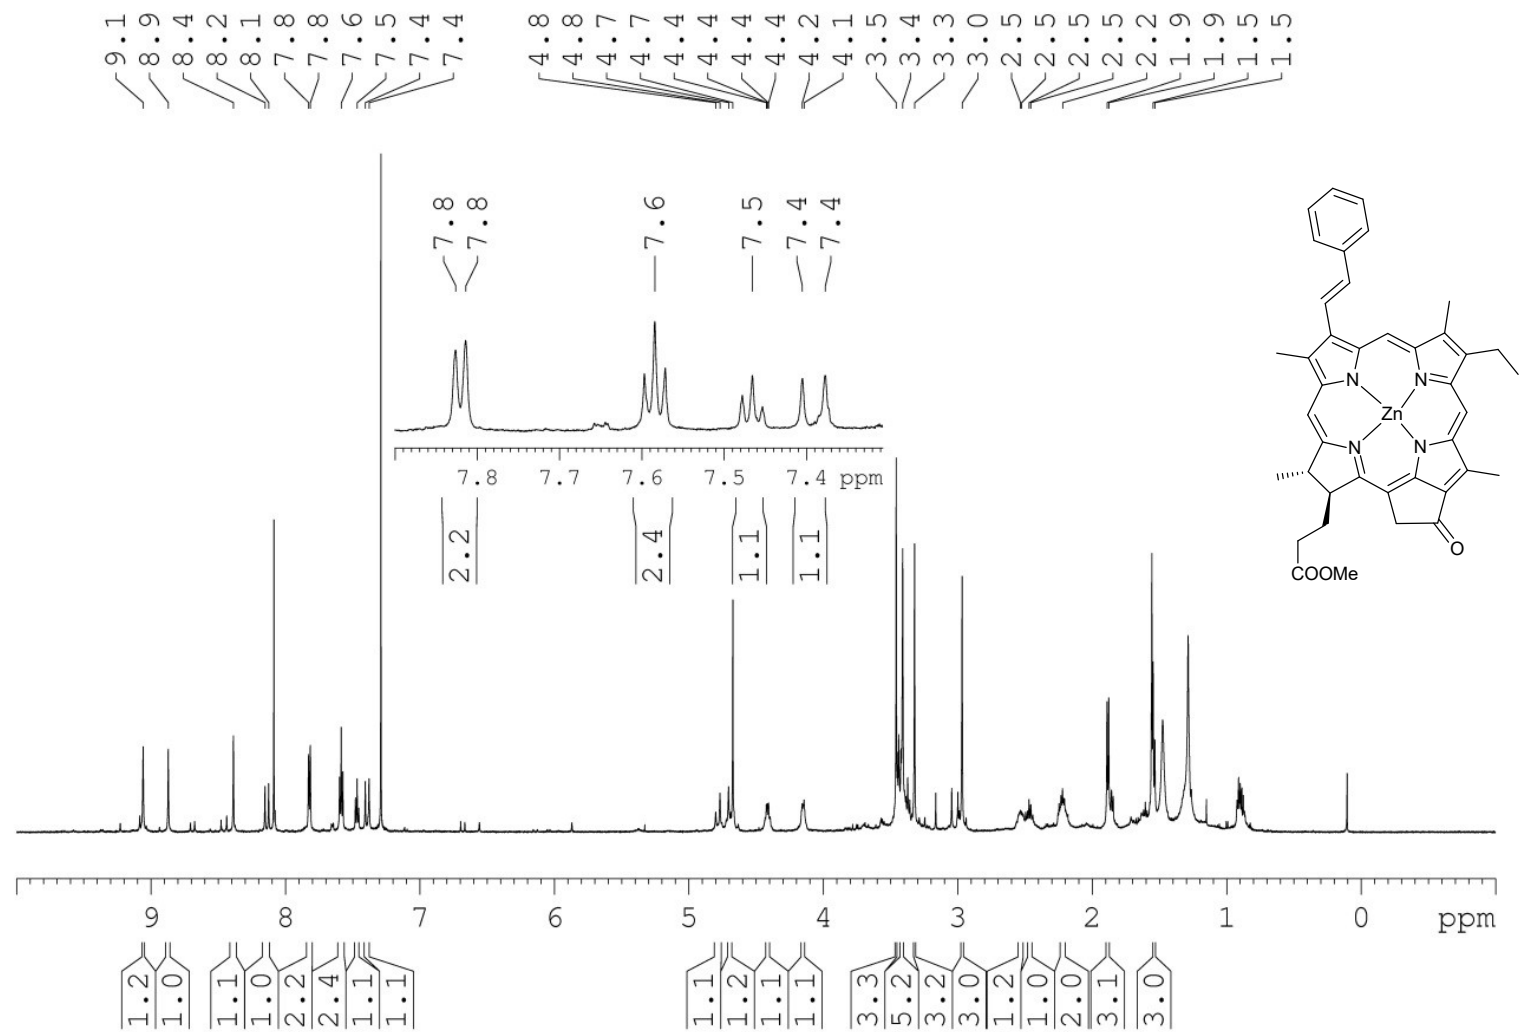

**Fig. S21.** <sup>1</sup>H NMR spectrum of Zn(II) methyl (*E*)-3<sup>2</sup>-phenylpyropheophorbide-*a* (**12b**) in CDCl<sub>3</sub>.

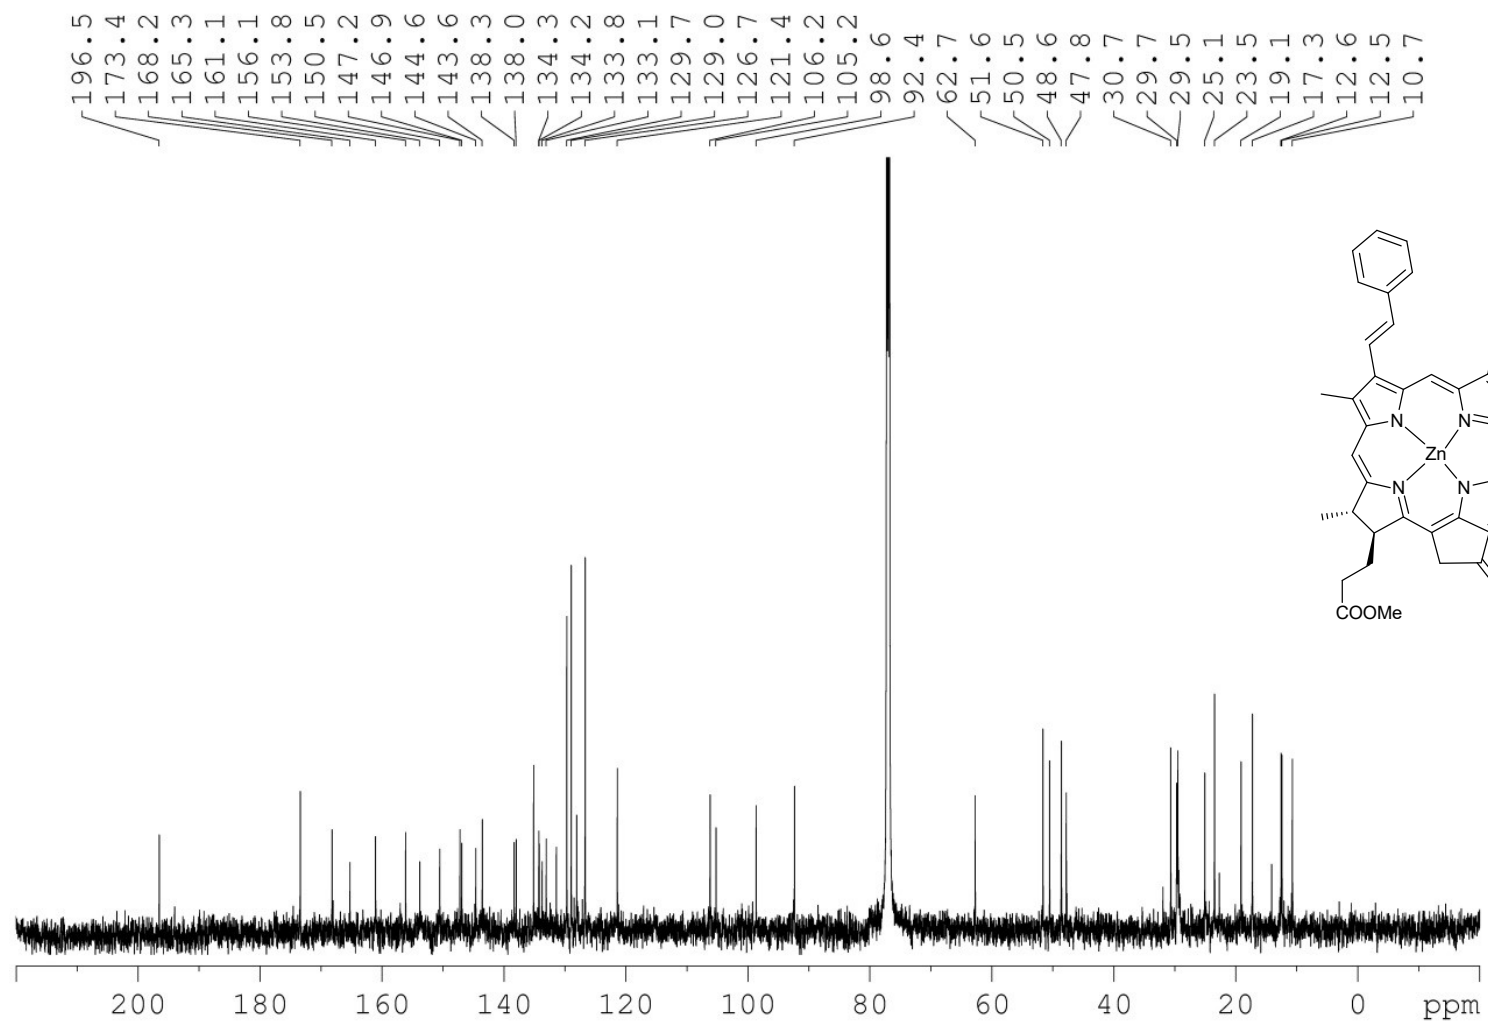

**Fig. S22.**  $^{13}\text{C}$  NMR spectrum of Zn(II) methyl (*E*)-3<sup>2</sup>-phenylpyropheophorbide-*a* (**12b**) in  $\text{CDCl}_3$ .

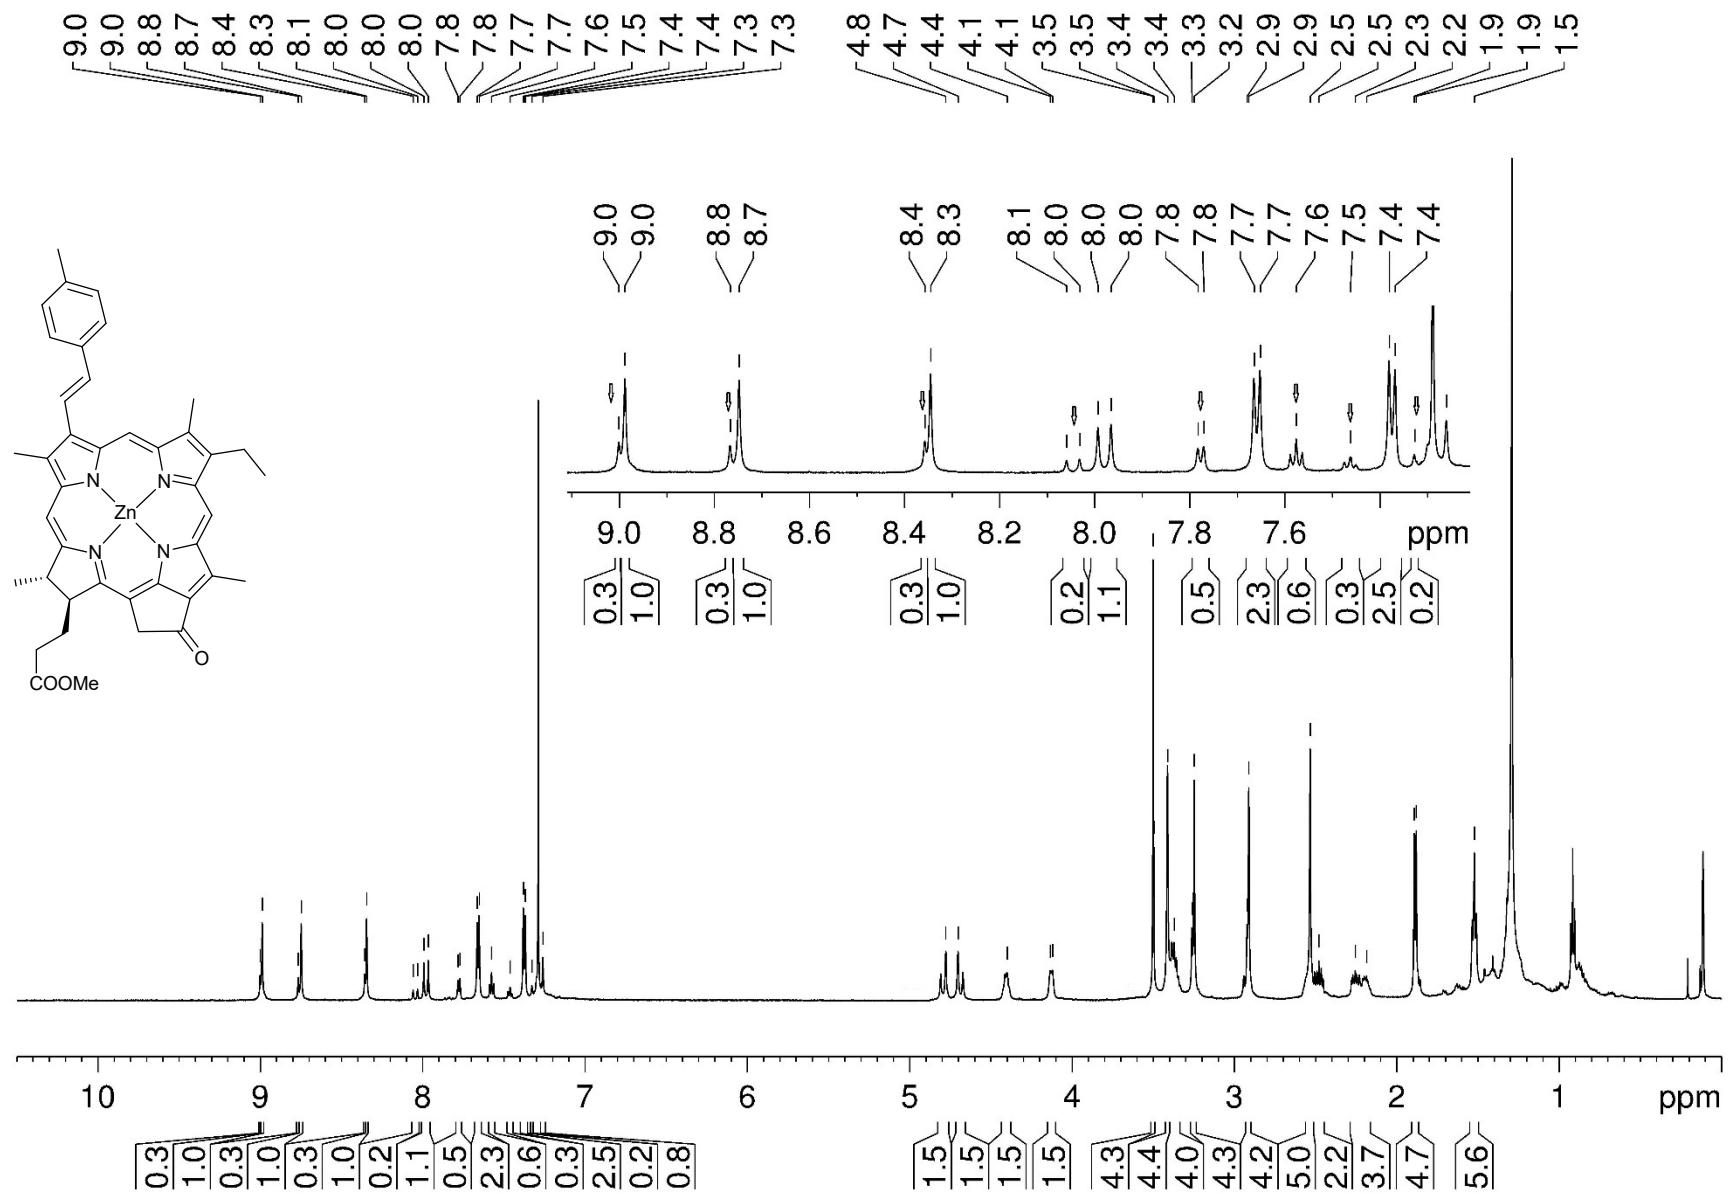

Fig. S23. <sup>1</sup>H NMR spectrum of Zn(II) methyl (*E*)-3<sup>2</sup>-(4-methylphenyl)pyropheophorbide-*a* (**13b**) in CDCl<sub>3</sub>.

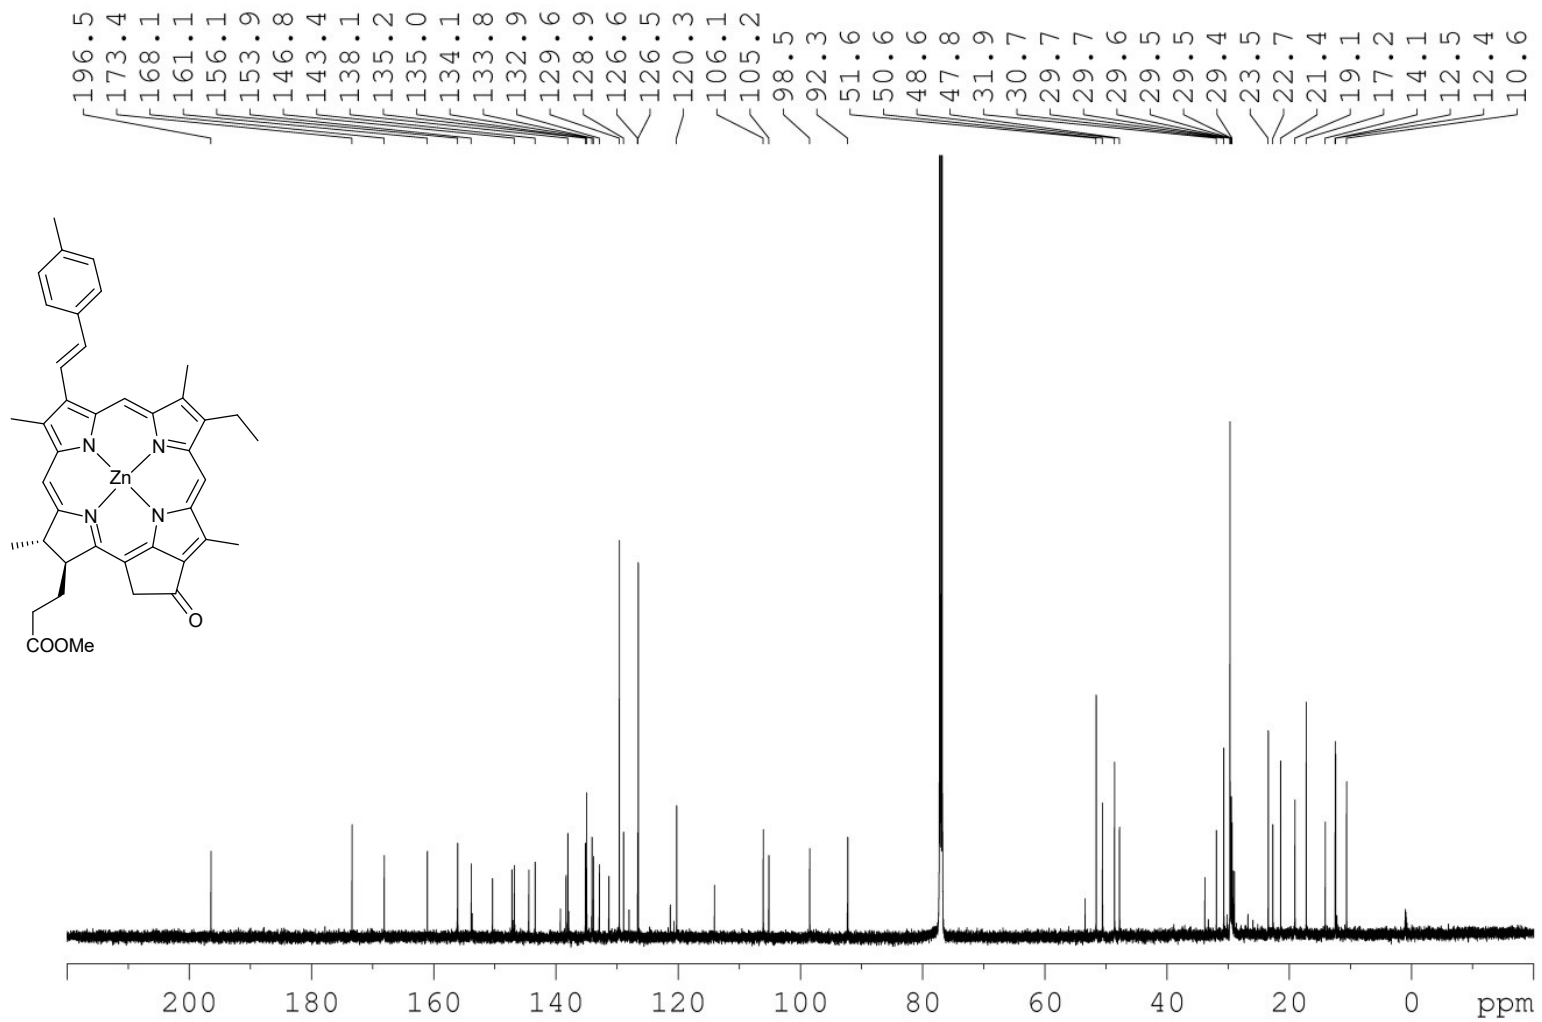

**Fig. S24.** <sup>13</sup>C NMR spectrum of Zn(II) methyl (E)-3<sup>2</sup>-(4-methylphenyl)pyropheophorbide-*a* (**13b**) in CDCl<sub>3</sub>.

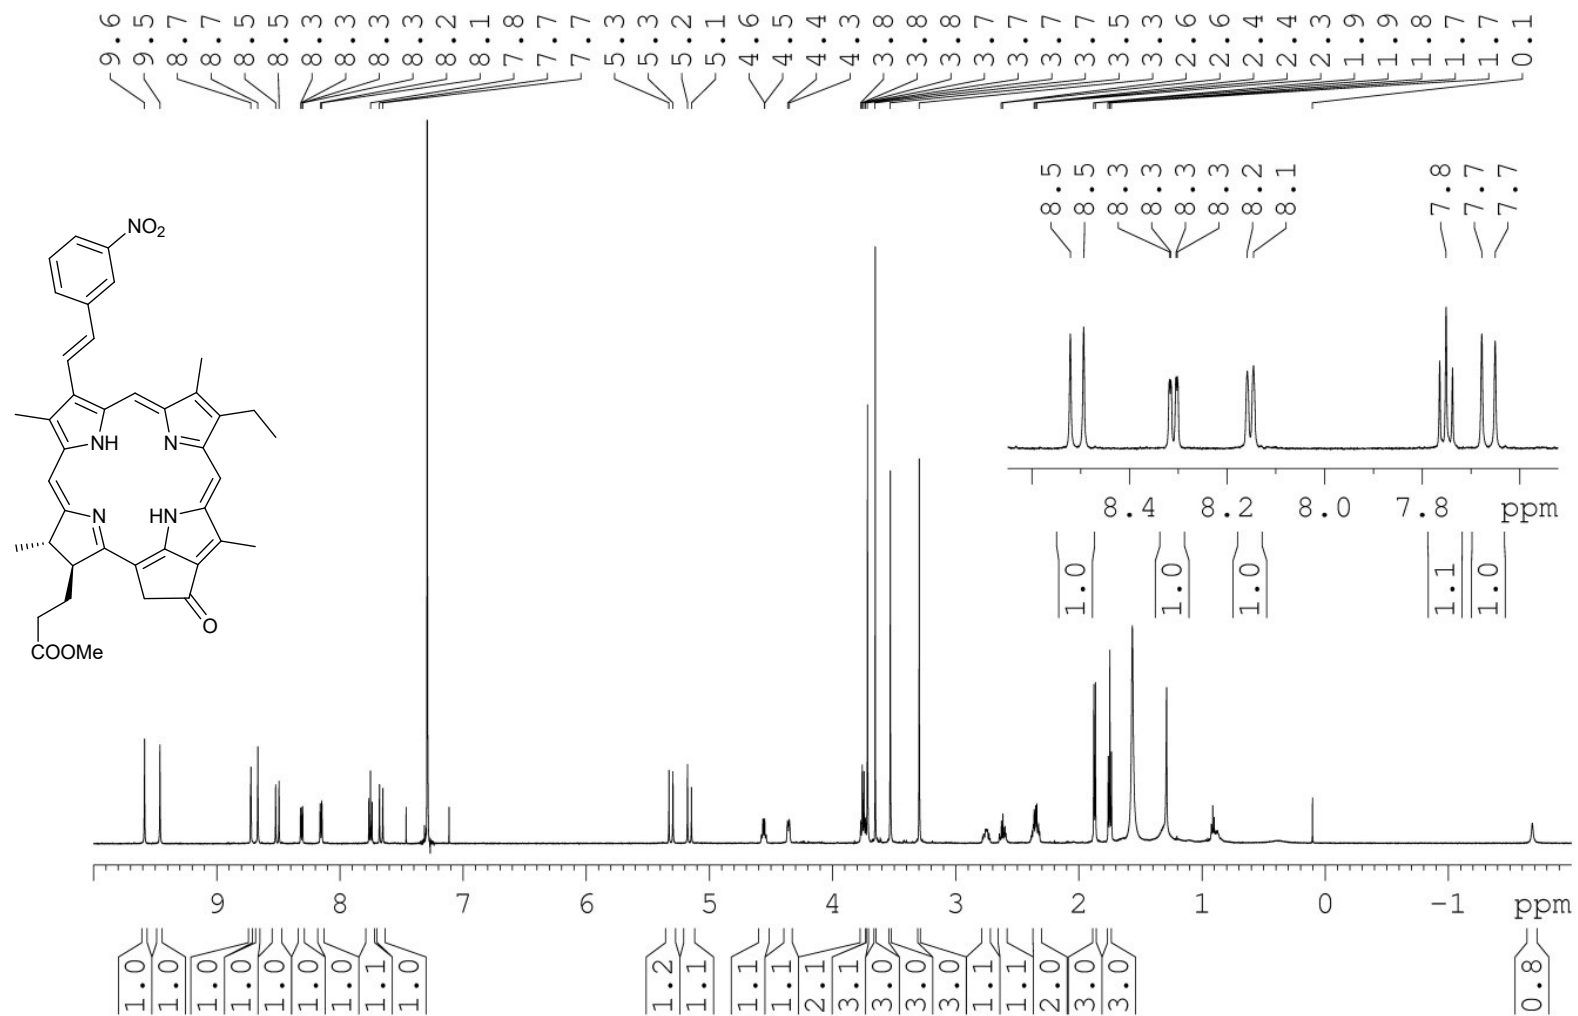

Fig. S25. <sup>1</sup>H NMR spectrum of methyl (*E*)-3<sup>2</sup>-(3-nitrophenyl)pyropheophorbide-*a* (**14a**) in CDCl<sub>3</sub>.

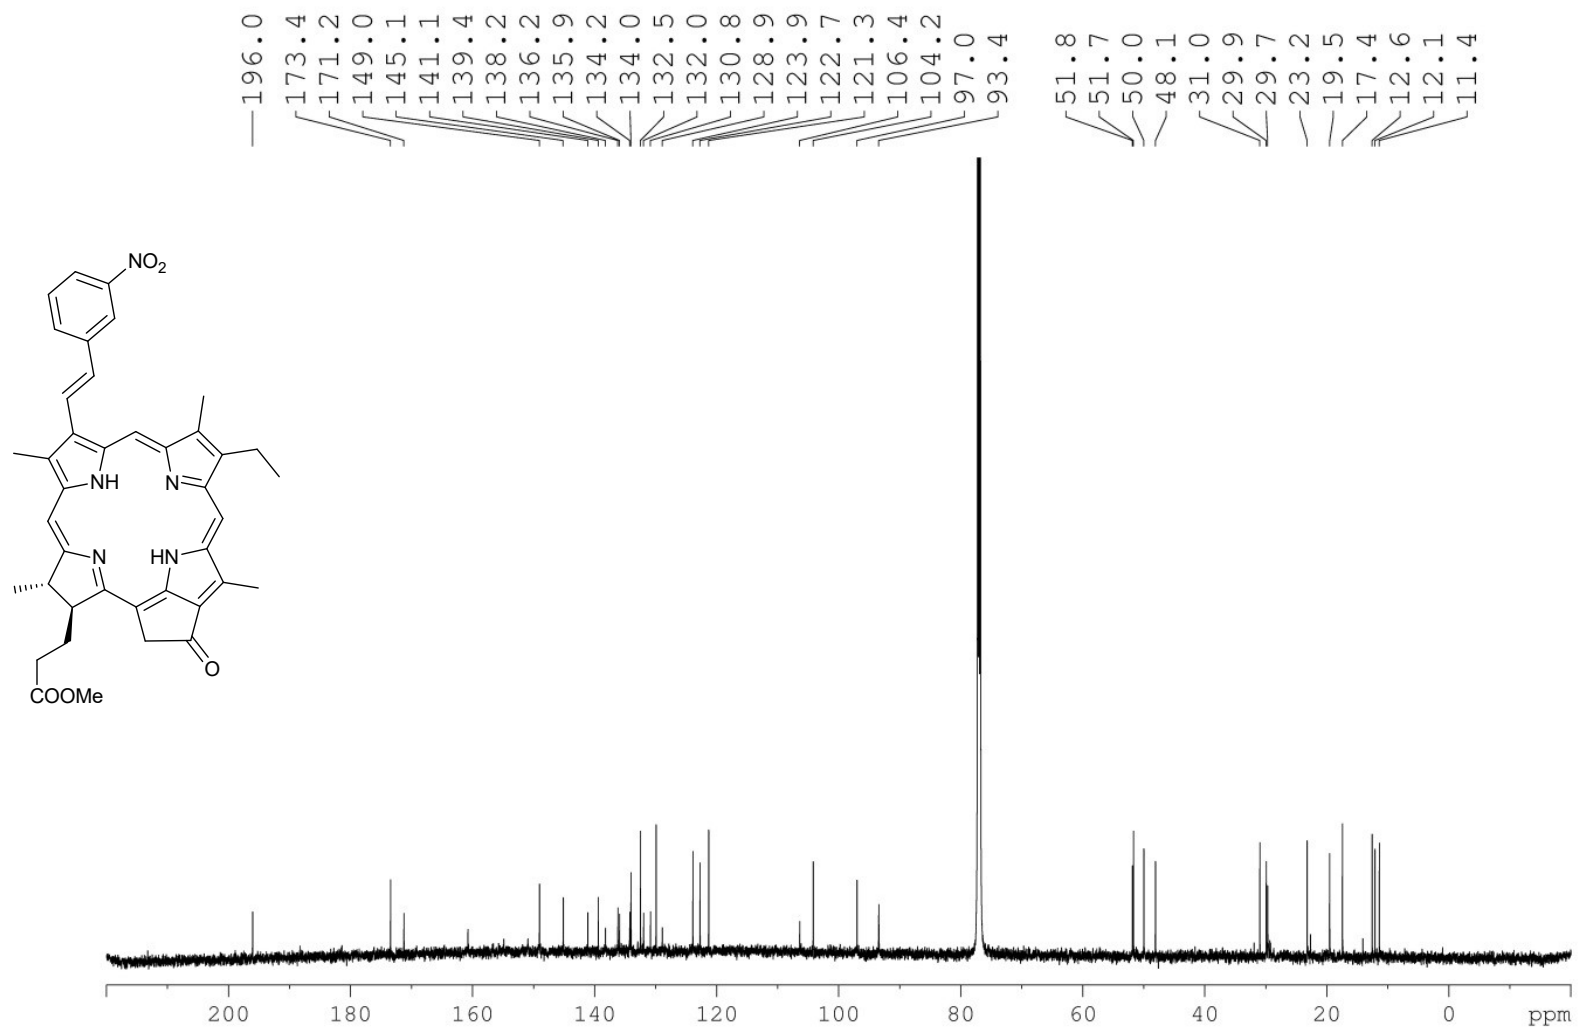

**Fig. S26.** <sup>13</sup>C NMR spectrum of methyl (*E*)-3<sup>2</sup>-(3-nitrophenyl)pyropheophorbide-*a* (**14a**) in CDCl<sub>3</sub>.

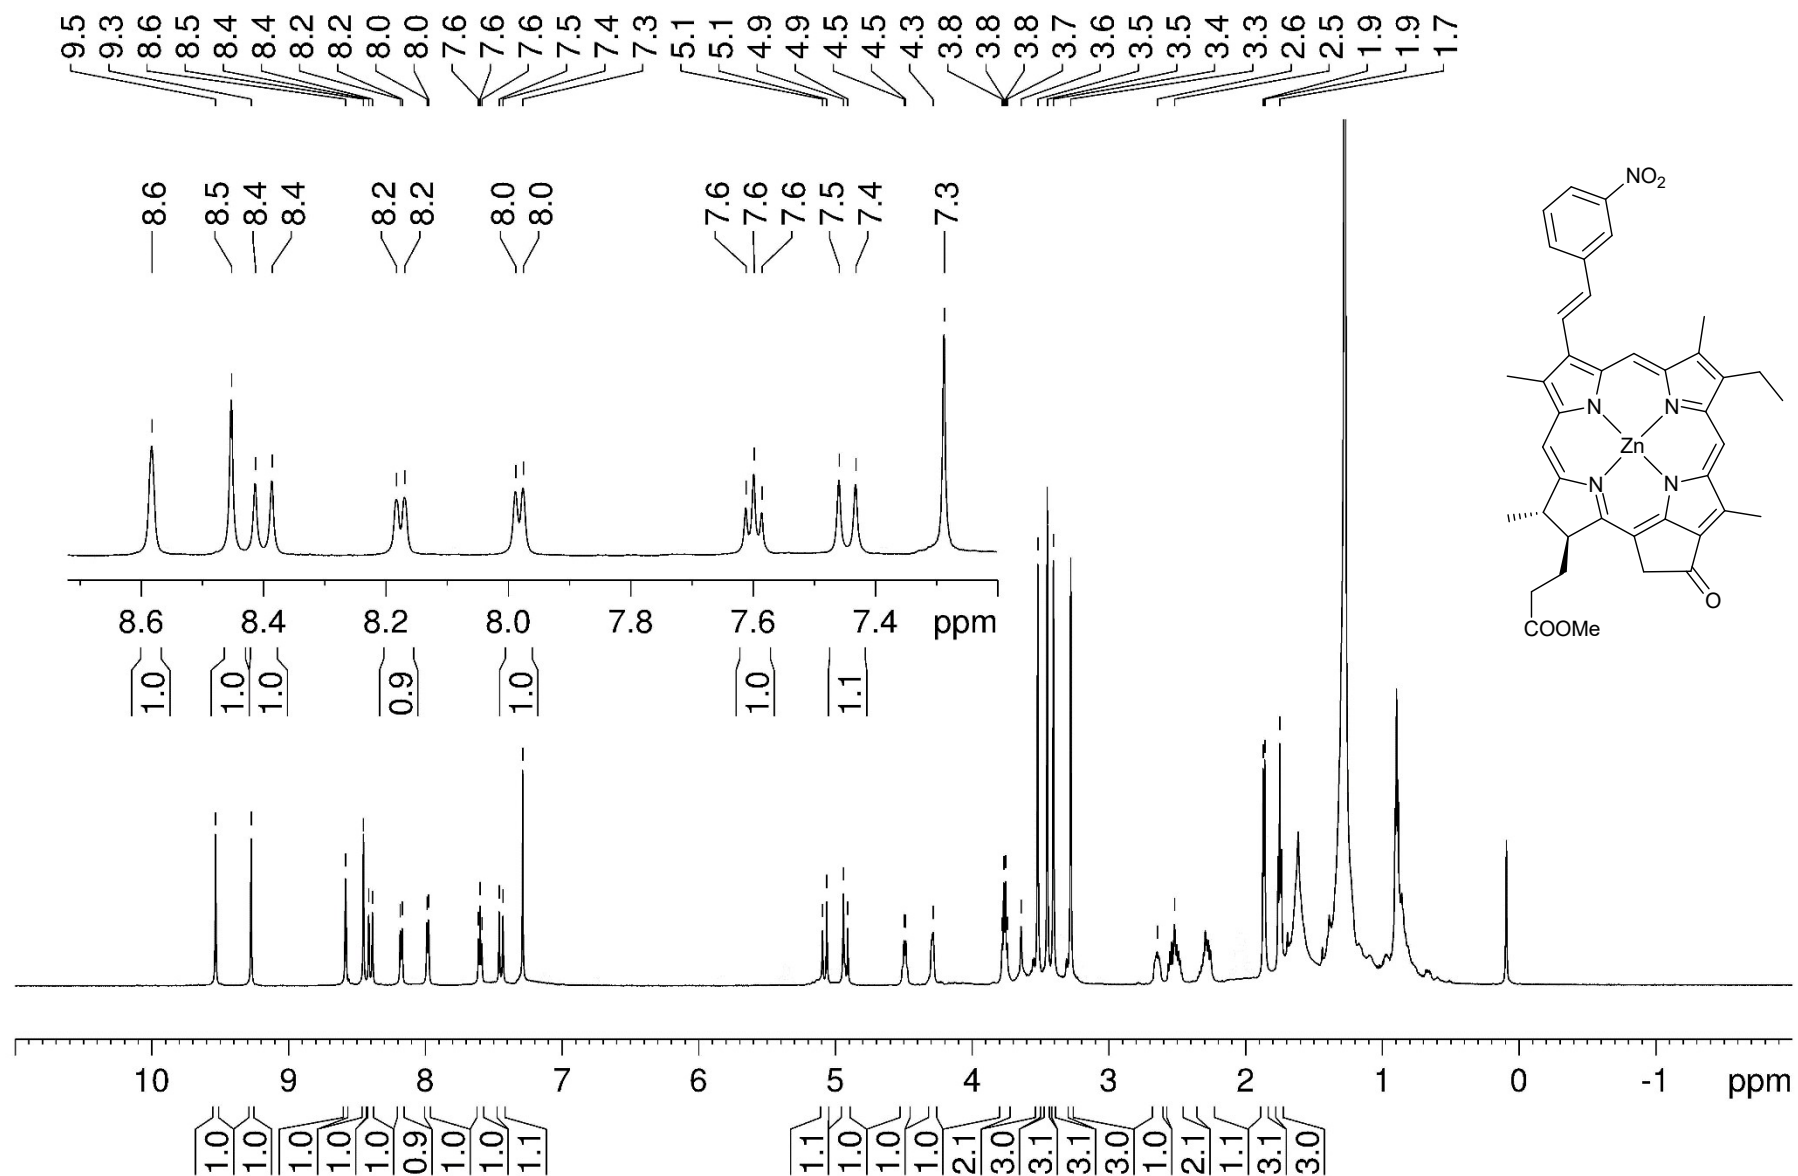

Fig. S27. <sup>1</sup>H NMR spectrum of Zn(II) methyl (*E*)-3<sup>2</sup>-(3-nitrophenyl)pyropheophorbide-*a* (**14b**) in CDCl<sub>3</sub>.



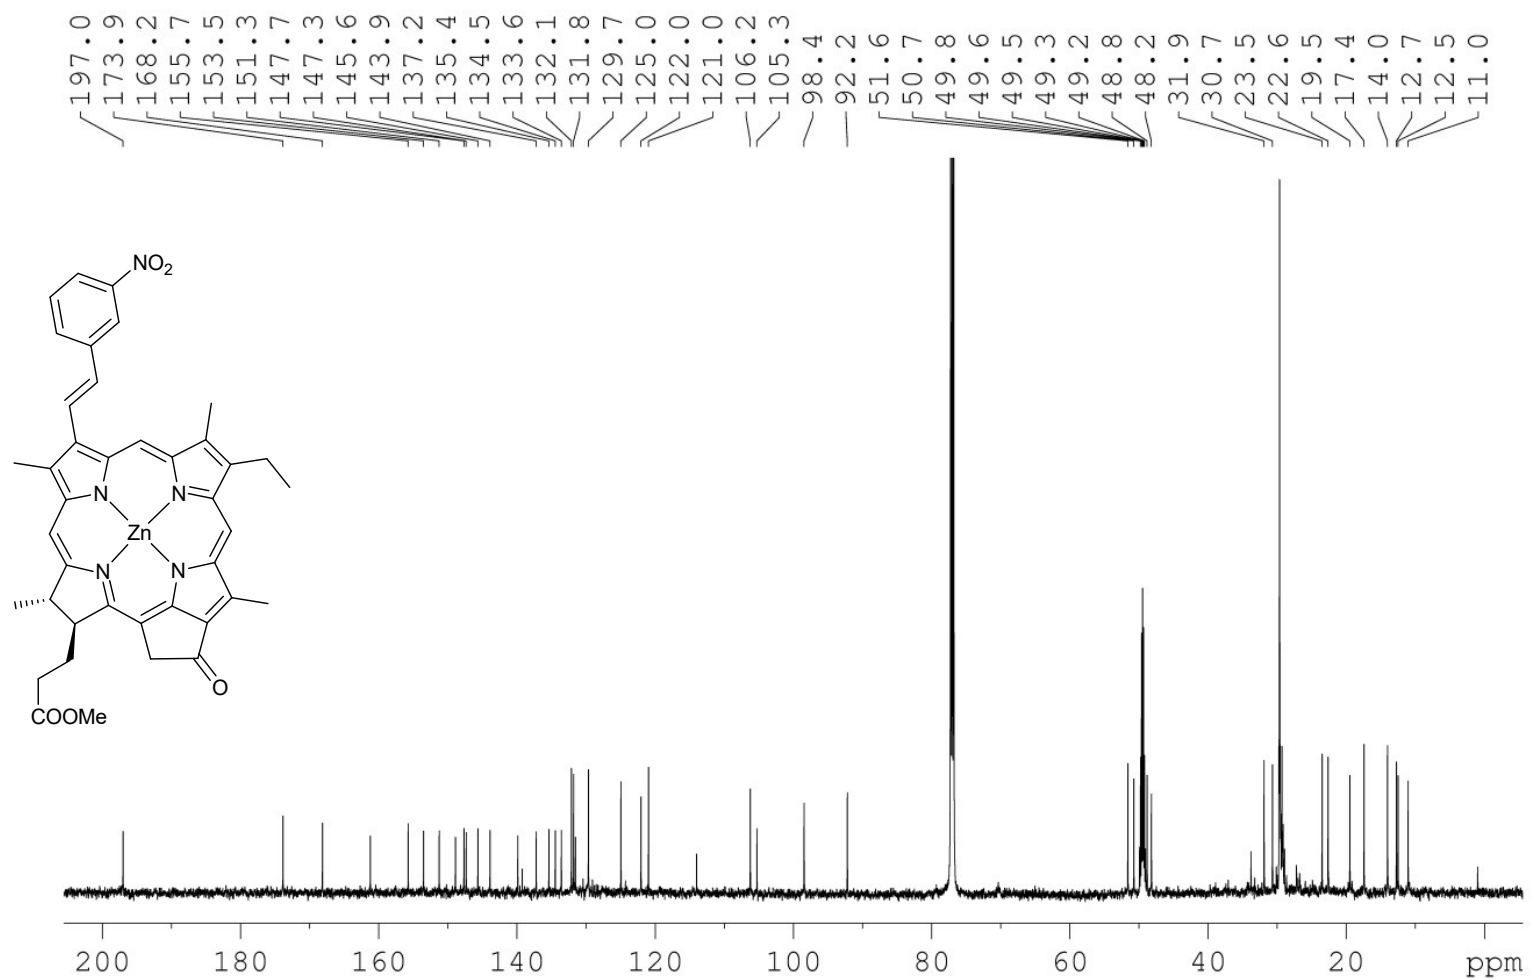

**Fig. S28.** <sup>13</sup>C NMR spectrum of Zn(II) methyl (*E*)-3<sup>2</sup>-(3-nitrophenyl)pyropheophorbide-*a* (**14b**) in CDCl<sub>3</sub>.

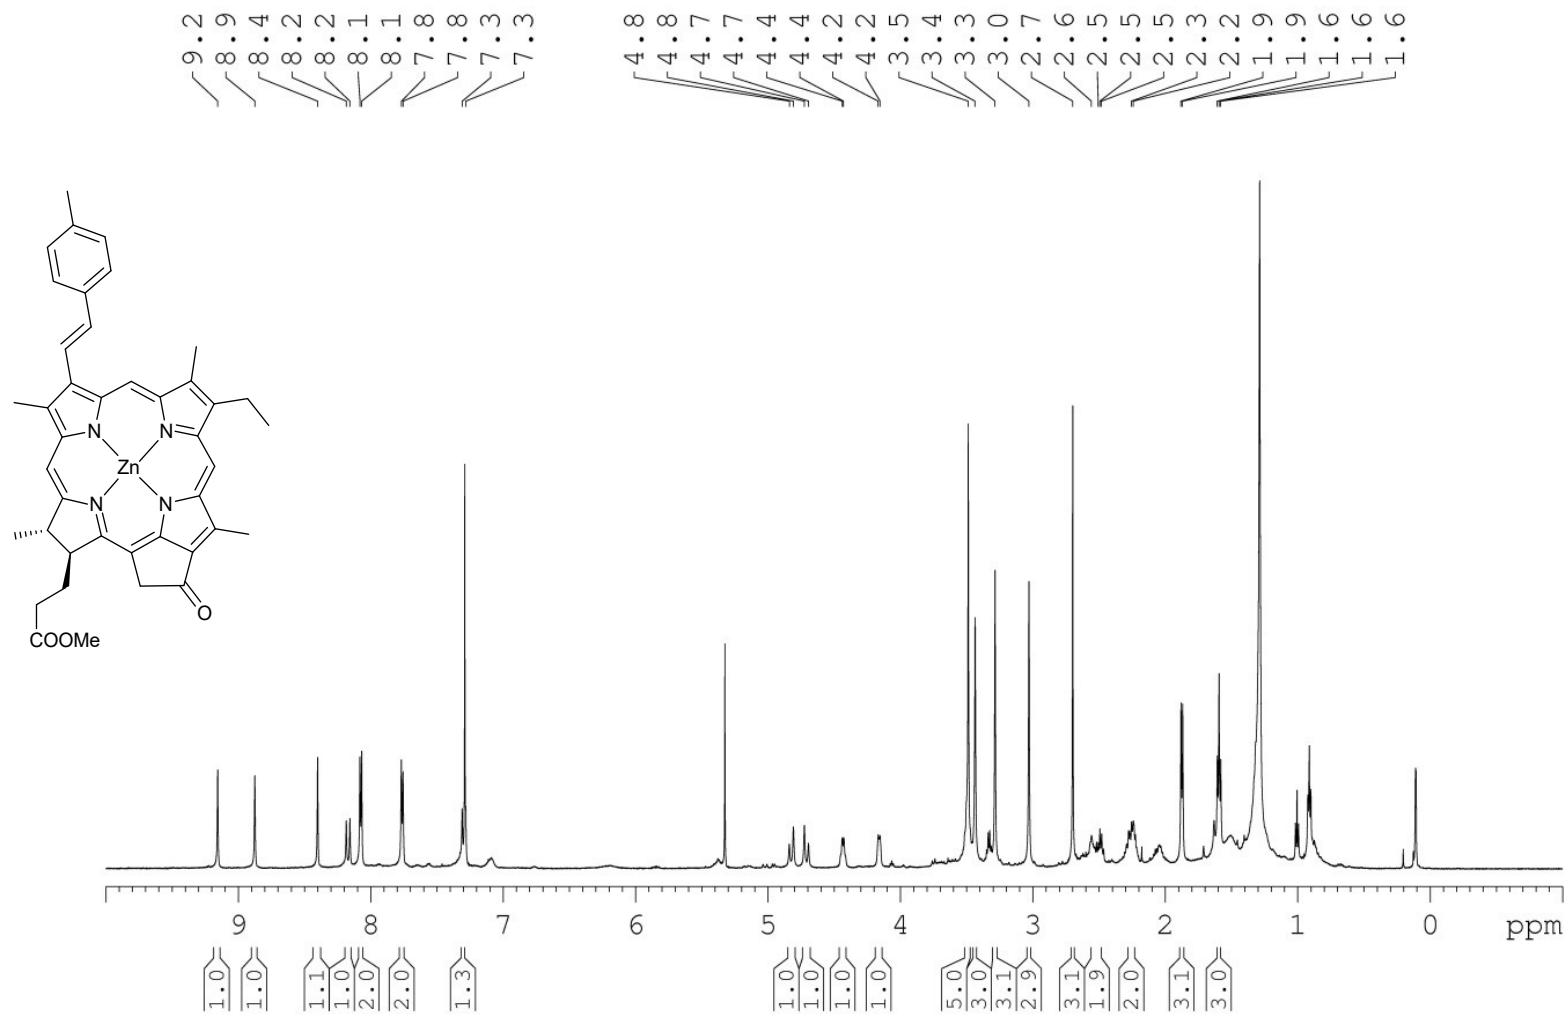

**Fig. S29.** <sup>1</sup>H NMR spectrum of Zn(II) methyl (*E*)-3<sup>2</sup>-(4-acetophenyl)pyropheophorbide-*a* (**15b**) in CDCl<sub>3</sub>.

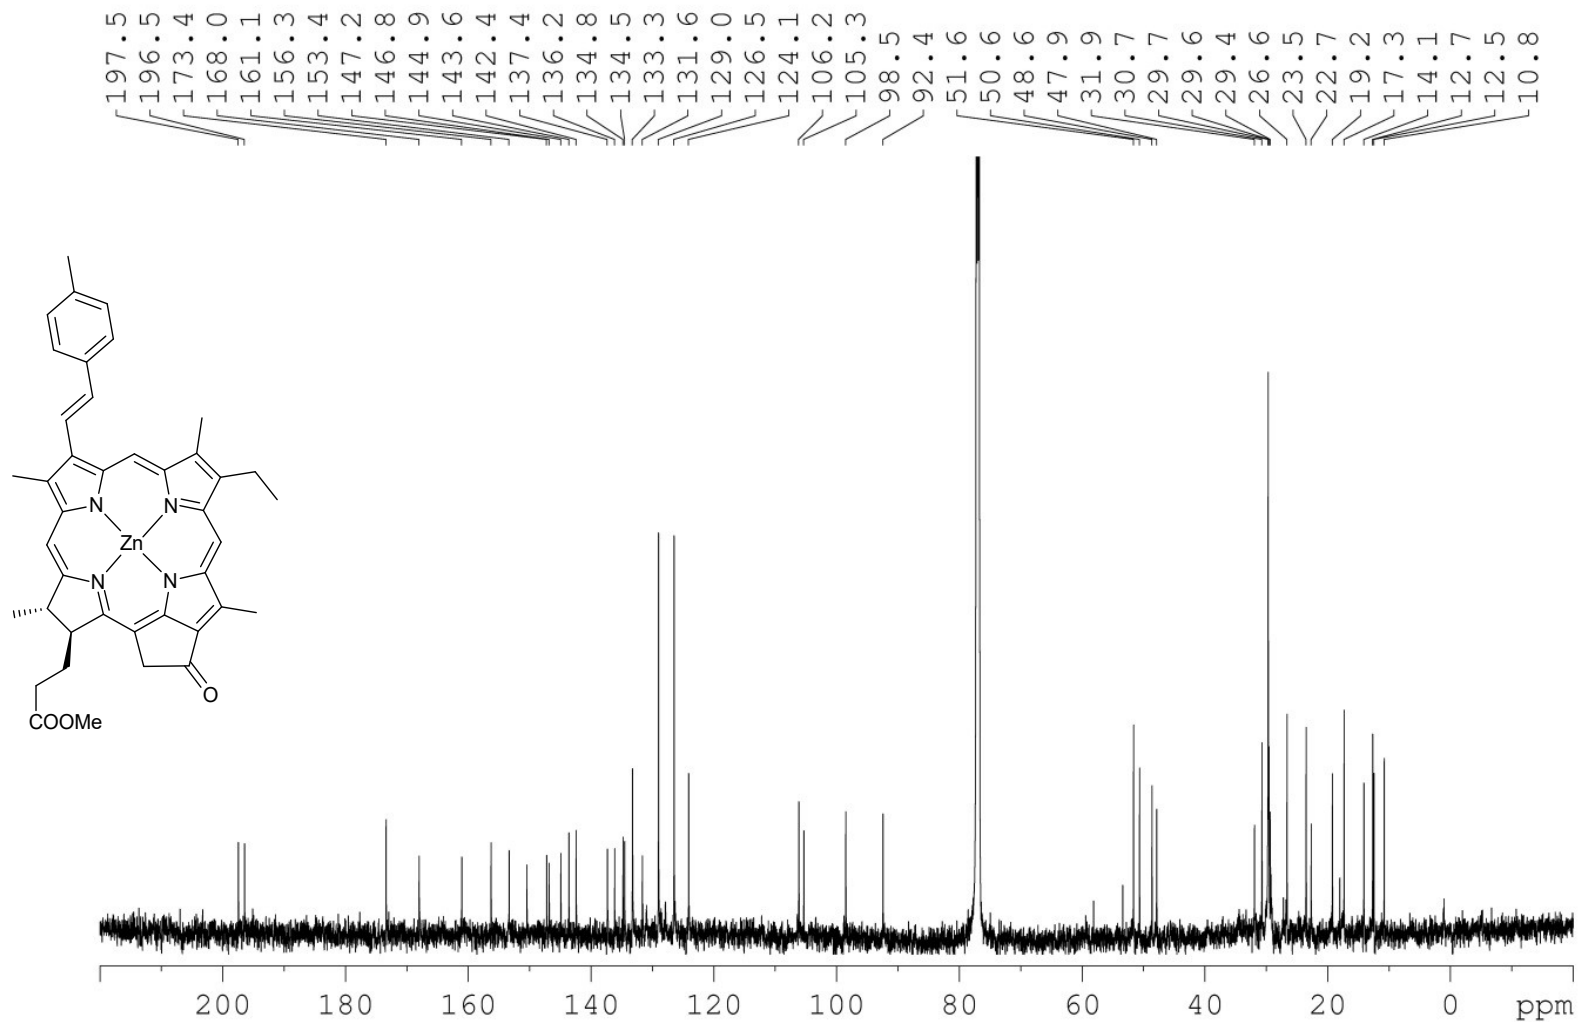

**Fig. S30.**  $^{13}\text{C}$  NMR spectrum of Zn(II) methyl (*E*)-3<sup>2</sup>-(4-acetophenyl)pyropheophorbide-*a* (**15b**) in  $\text{CDCl}_3$ .

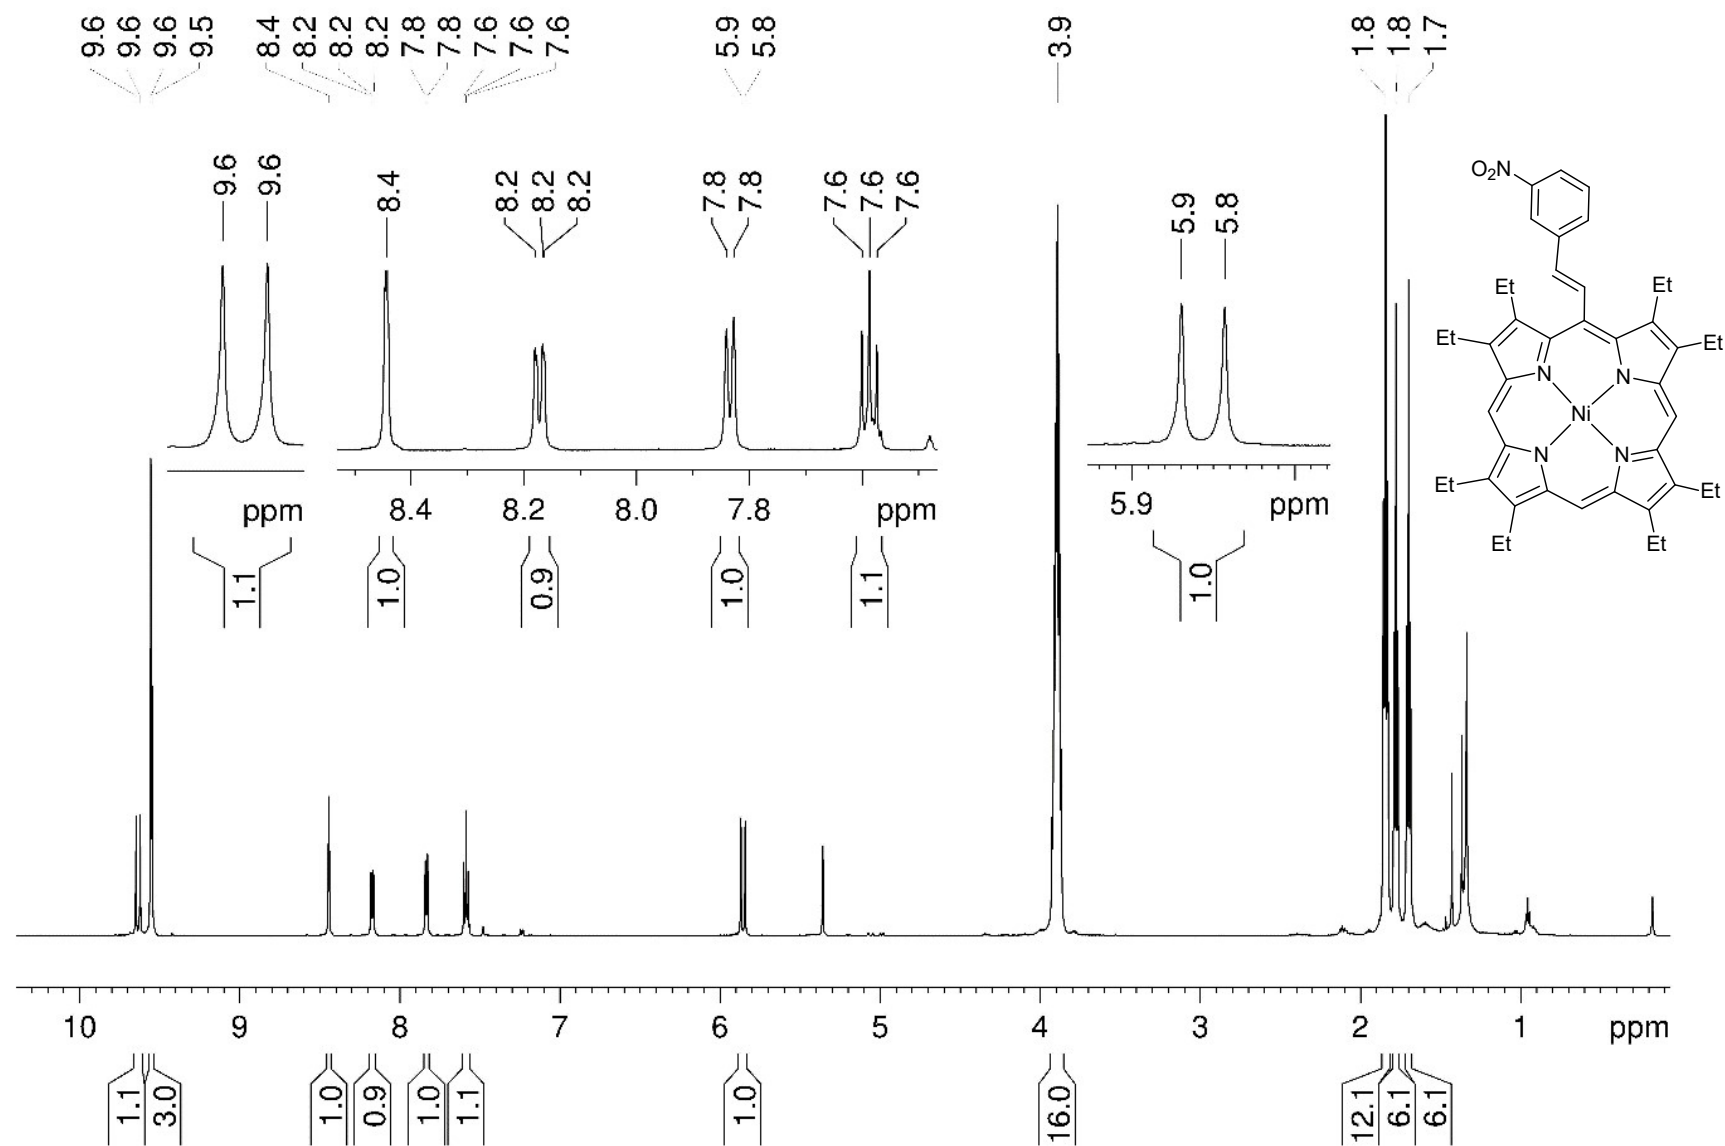

Fig. S31. <sup>1</sup>H NMR spectrum of Ni(II) (*E*)-5-(2-(3-nitrophenyl)ethenyl)-2,3,7,8,12,13,17,18-octaethylporphyrin (**16**) in CDCl<sub>3</sub>.

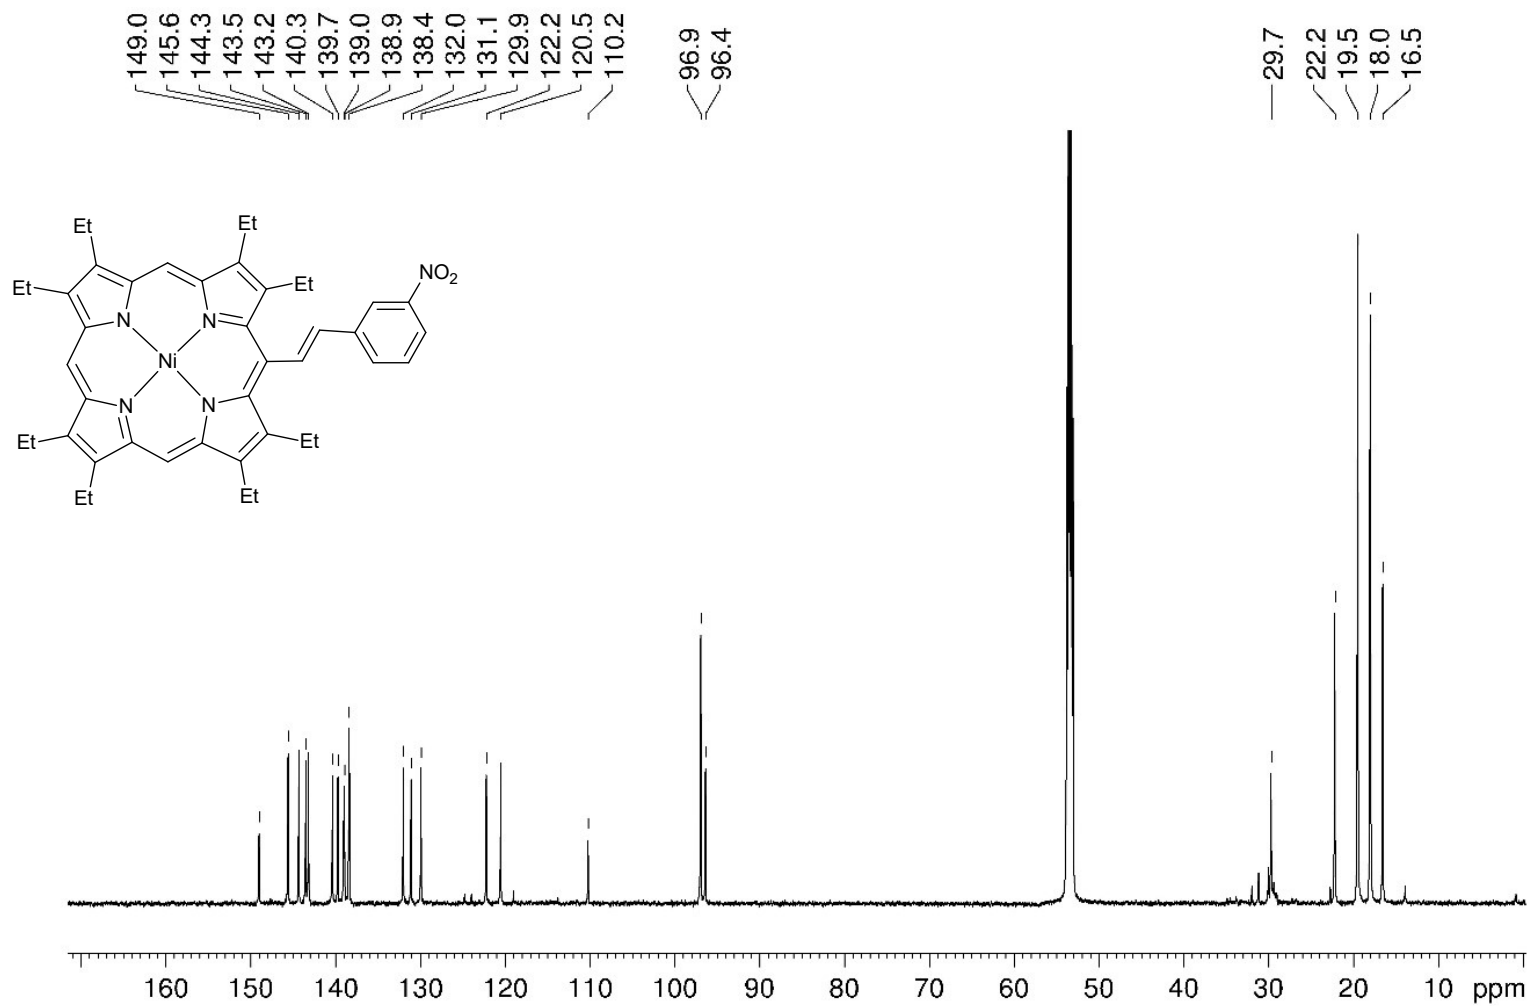

**Fig. S32.**  $^{13}\text{C}$  NMR spectrum of Ni(II) (*E*)-5-(2-(3-nitrophenyl)ethenyl)-2,3,7,8,12,13,17,18-octaethylporphyrin (**16**) in  $\text{CDCl}_3$ .

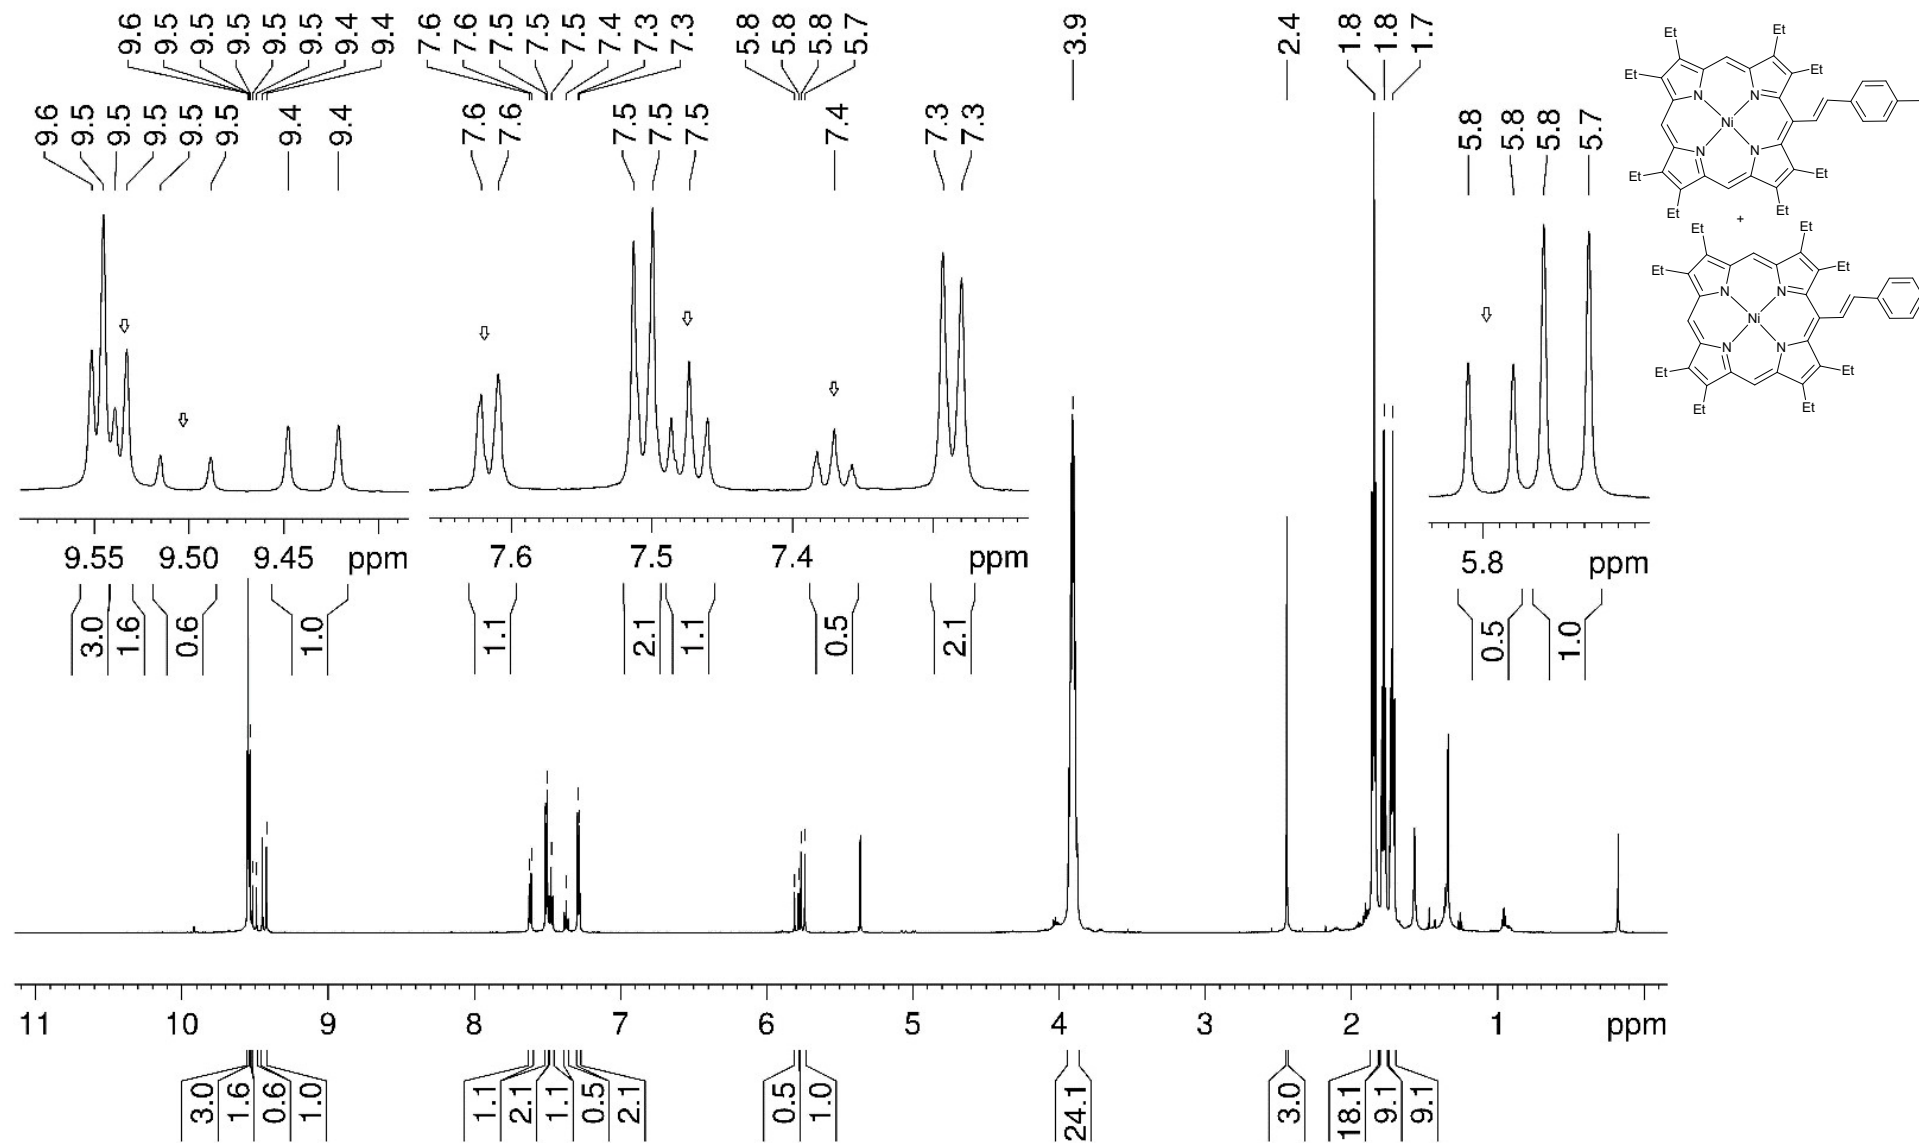

**Fig. S33.**  $^1\text{H}$  NMR spectrum of the mixture of Ni(II) (*E*)-5-(2-(4-methylphenyl)ethenyl)-2,3,7,8,12,13,17,18-octaethylporphyrin (**17**) and Ni(II) (*E*)-5-(2-phenylethenyl)-2,3,7,8,12,13,17,18-octaethylporphyrin (**18**) in  $\text{CDCl}_3$ . Peaks of **18** are noted with arrows.

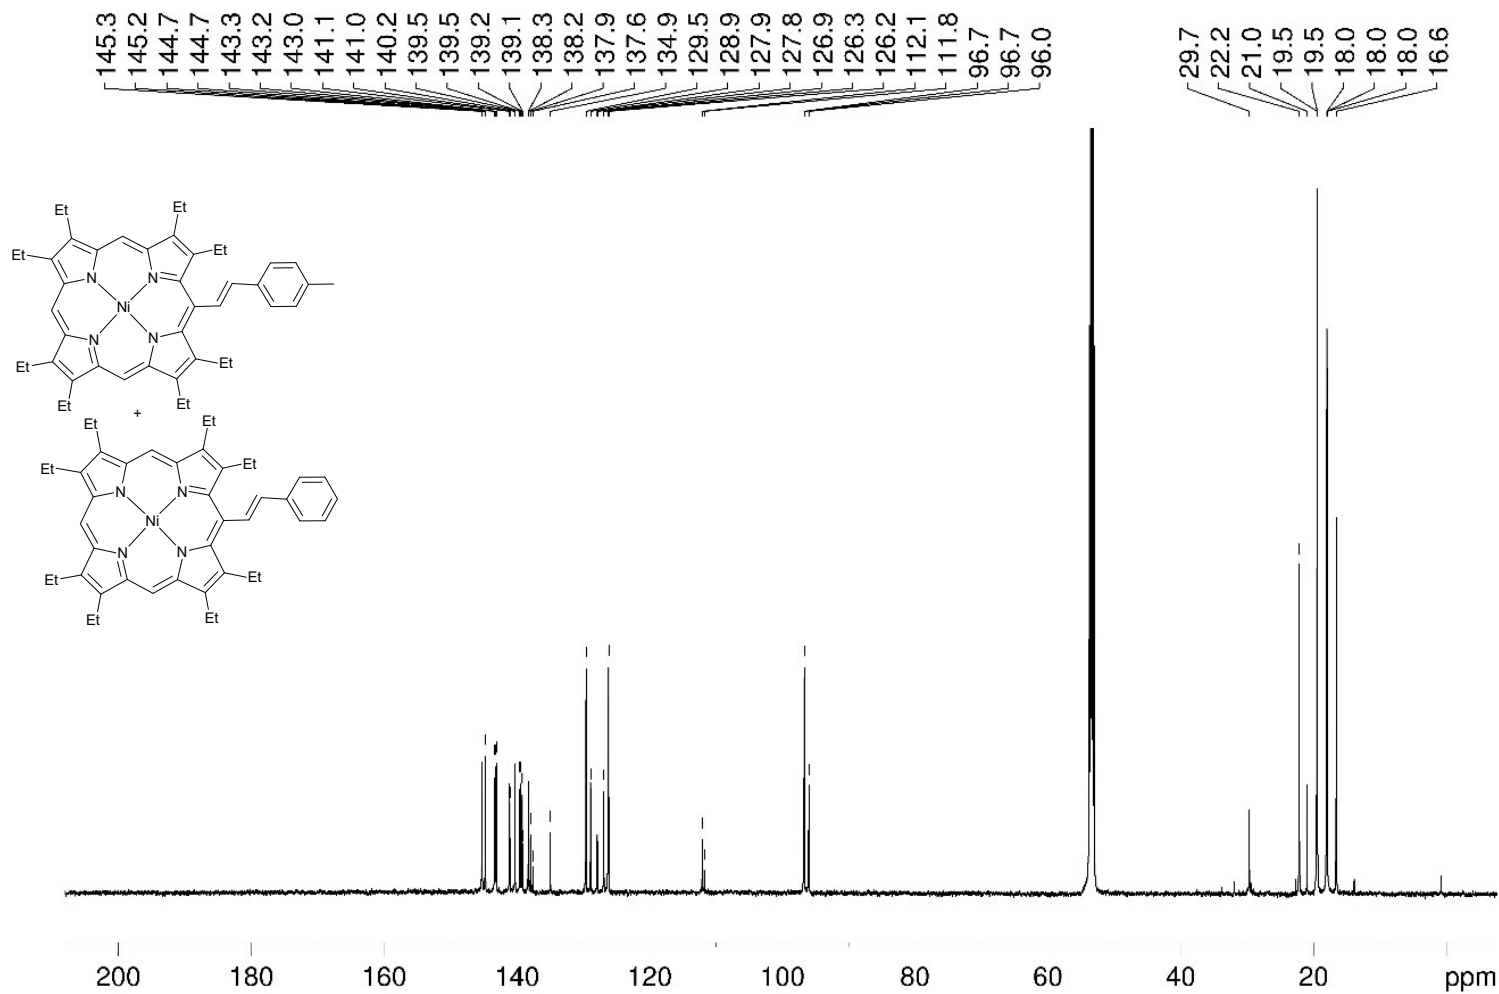

**Fig. S34.**  $^{13}\text{C}$  NMR spectrum of the mixture of Ni(II) (*E*)-5-(2-(4-methylphenyl)ethenyl)-2,3,7,8,12,13,17,18-octaethylporphyrin (**17**) and Ni(II) (*E*)-5-(2-phenylethenyl)-2,3,7,8,12,13,17,18-octaethylporphyrin (**18**) in  $\text{CDCl}_3$ .

### UV-Vis absorption spectra

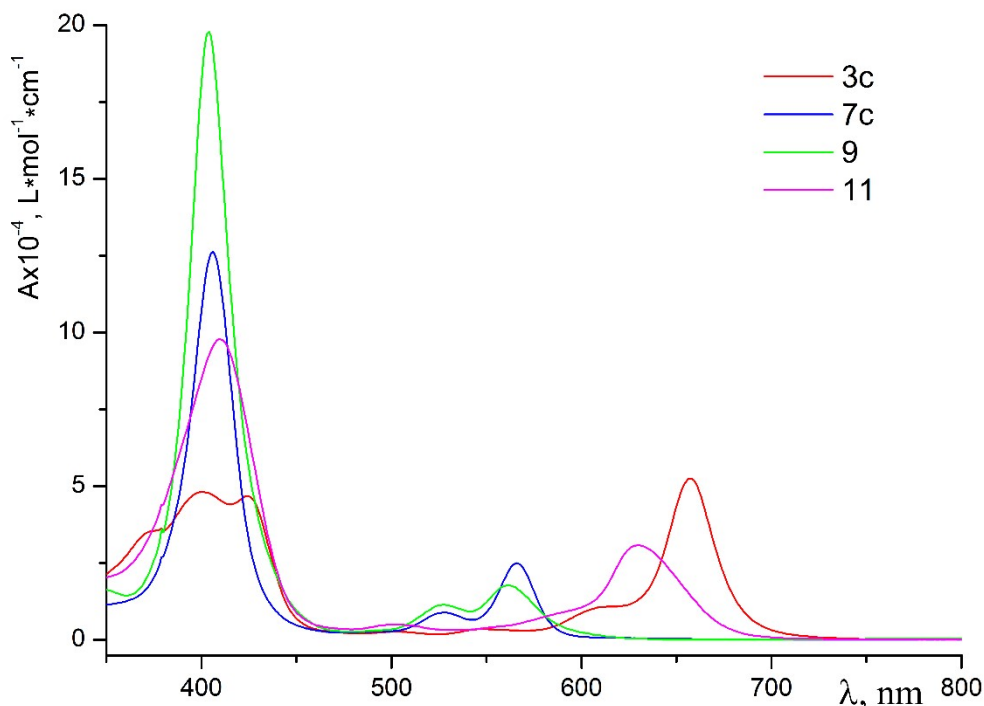

**Fig. S32.** Molar extinction normalized UV-Vis absorption spectra of Ni(II) methyl (*E*)-3<sup>2</sup>-(4,4,5,5-tetramethyl-1,3,2-dioxaborolane-2-yl)pyropheophorbide-*a* (**3c**), Ni(II) dimethyl (*E,E*)-3<sup>2</sup>,8<sup>2</sup>-bis(4,4,5,5-tetramethyl-1,3,2-dioxaborolane-2-yl)protoporphyrin IX (**7c**), Ni (II) (*E*) 5-(2-(4,4,5,5-tetramethyl-1,3,2-dioxaborolane-2-yl)viny)l)-2,3,7,8,12,13,17,18-octaethylporphyrin (**9**), Ni (II) (*E*) 5-(2-(4,4,5,5-tetramethyl-1,3,2-dioxaborolane-2-yl)viny)l)-2,3,7,8,12,13,17,18-octaethyl-17,18-*trans*-dihydroporphyrin (**11**) in CH<sub>2</sub>Cl<sub>2</sub>.

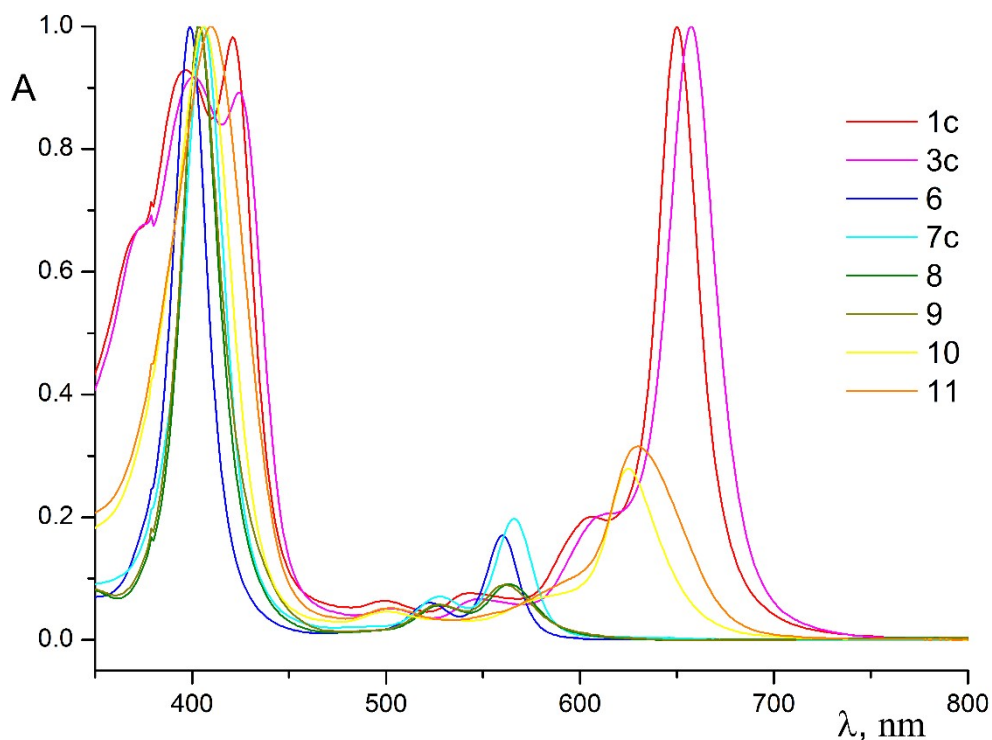

**Fig. S33.** Normalized UV-Vis absorption spectra of the starting vinylporphyrins **1c**, **4**, **6c**, **8** and the corresponding borylation products **3c**, **5**, **7c**, **9** in CH<sub>2</sub>Cl<sub>2</sub>.



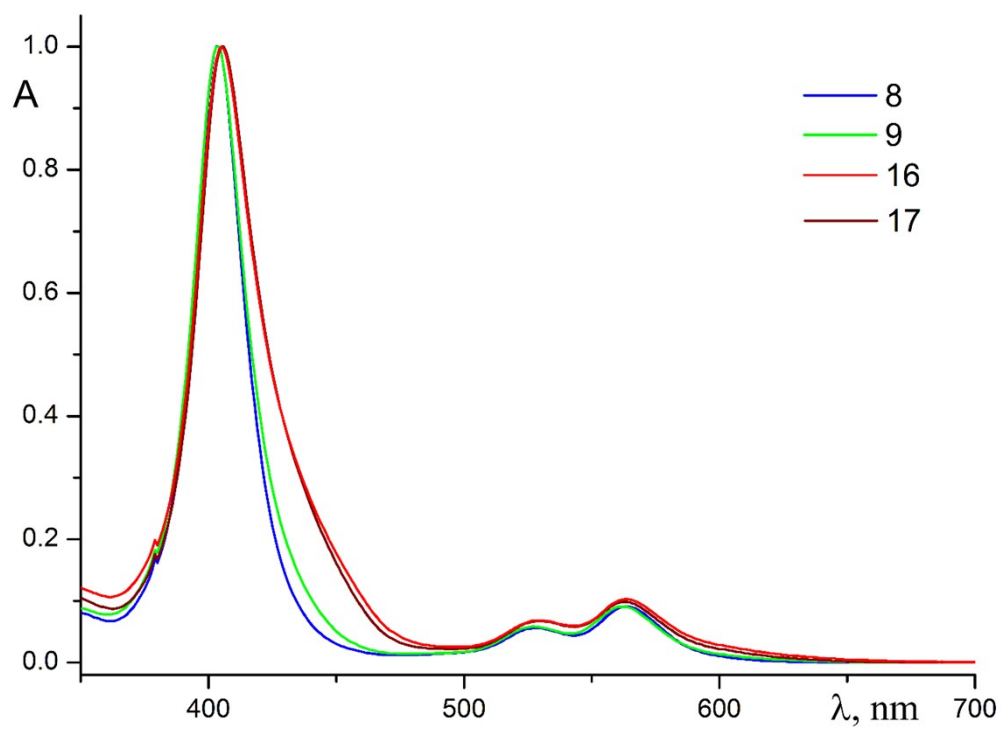

**Fig. S34.** Normalized UV-Vis absorption spectra of the starting vinylporphyrin **8**, its borylation product **9**, and the corresponding arylation products **16**, **17** in  $\text{CH}_2\text{Cl}_2$ .

## References

1. M. Katterle, A. R. Holzwarth and A. Jesorka, *European Journal of Organic Chemistry*, 2006, **2006**, 414-422.
2. H. Morishita and H. Tamiaki, *Spectrochimica Acta Part A: Molecular and Biomolecular Spectroscopy*, 2009, **72**, 274-279.
3. H. Tamiaki, S. Machida and K. Mizutani, *The Journal of Organic Chemistry*, 2012, **77**, 4751-4758.
4. I. S. Lonin, A. S. Kuzovlev, E. S. Belyaev, G. V. Ponomarev, O. I. Koifman and A. Y. Tsivadze, *J. Porphyr. Phthalocyanines*, 2014, **18**, 123-128.
5. A. D. Adler, F. R. Longo, F. Kampas and J. Kim, *Journal of Inorganic and Nuclear Chemistry*, 1970, **32**, 2443-2445.
6. H. W. Whitlock, R. Hanauer, M. Y. Oester and B. K. Bower, *Journal of the American Chemical Society*, 1969, **91**, 7485-7489.
7. W. W. Kalisch, M. O. Senge and K. Ruhlandt-Senge, *Photochemistry and Photobiology*, 1998, **67**, 312-323.
8. A. O. Shkirdova, I. A. Zamilatskov, N. M. Stanetskaya, V. A. Tafeenko, V. S. Tyurin, V. V. Chernyshev, G. V. Ponomarev and A. Y. Tsivadze, *Macroheterocycles*, 2017, **10**, 480-486.
9. D. P. Arnold and R. D. Hartnell, *Tetrahedron*, 2001, **57**, 1335-1345.
10. J. M. O'Brien, E. Sitte, K. J. Flanagan, H. Kühner, L. J. Hallen, D. Gibbons and M. O. Senge, *The Journal of Organic Chemistry*, 2019, **84**, 6158-6173.
11. D. P. Arnold, R. Gaete-Holmes, A. W. Johnson, A. R. P. Smith and G. A. Williams, *Journal of the Chemical Society, Perkin Transactions 1*, 1978, DOI: 10.1039/P19780001660, 1660-1670.
